# Supplementary material for: Integrative Meta-Analysis of Differential Gene Expression in Acute Myeloid Leukemia
Source: PubMed Central journal article supplement (PMC2830886; doi:10.1371/journal.pone.0009466), 2010-03-01
Supplement: pone.0009466.s001.pdf [file pone.0009466.s001.pdf]

**Table S1. List of identification tags and descriptions**

| Identification Tag name            | No. of references | No. of differentially expressed features | Identification Tag description                                                   |
|------------------------------------|-------------------|------------------------------------------|----------------------------------------------------------------------------------|
| <i>11q23</i>                       | 5                 | 559                                      | 11q23 abnormalities                                                              |
| <i>abnormal cytogenetics</i>       | 1                 | 150                                      | abnormal cytogenetics                                                            |
| <i>adult</i>                       | 12                | 7254                                     | greater than or equal to 18 years of age                                         |
| <i>ALL</i>                         | 3                 | 212                                      | acute lymphocytic leukemia                                                       |
| <i>AML</i>                         | 25                | 15697                                    | acute myeloid leukemia                                                           |
| <i>aneuploid</i>                   | 1                 | 64                                       | aneuploid chromosome number                                                      |
| <i>CBF</i>                         | 2                 | 2410                                     | core binding factor translocation                                                |
| <i>CD34+CD38- fraction</i>         | 1                 | 411                                      | CD34+CD38- cell fraction from AML                                                |
| <i>CD34+CD38+ fraction</i>         | 1                 | 411                                      | CD34+CD38+ cell fraction from AML                                                |
| <i>CEBPA mutation</i>              | 2                 | 402                                      | <i>CEBPA</i> gene mutation                                                       |
| <i>CEBPA silenced</i>              | 1                 | 304                                      | <i>CEBPA</i> gene silenced                                                       |
| <i>control</i>                     | 2                 | 55                                       | CD34+ cells from normal patient                                                  |
| <i>del(7q)</i>                     | 1                 | 48                                       | deletion of long arm of chromosome 7                                             |
| <i>euploid</i>                     | 1                 | 64                                       | euploid chromosome number                                                        |
| <i>EVI1 overexpression</i>         | 1                 | 28                                       | <i>EVI1</i> gene overexpression                                                  |
| <i>FAB</i>                         | 1                 | 213                                      | Associated with FAB, unspecified subtype                                         |
| <i>FAB-M3</i>                      | 1                 | 20                                       | FAB subtype M3                                                                   |
| <i>FAB-M3v</i>                     | 1                 | 20                                       | FAB subtype M3v                                                                  |
| <i>FAB-M4</i>                      | 1                 | 40                                       | FAB subtype M4                                                                   |
| <i>FAB-M5</i>                      | 1                 | 40                                       | FAB subtype M5                                                                   |
| <i>FAB-M7</i>                      | 1                 | 100                                      | FAB subtype M7                                                                   |
| <i>FLT3 mutation</i>               | 4                 | 663                                      | <i>FLT3</i> gene mutation                                                        |
| <i>FLT3-ALM</i>                    | 1                 | 23                                       | <i>FLT3</i> gene activating loop mutations                                       |
| <i>FLT3-ITD</i>                    | 4                 | 355                                      | <i>FLT3</i> gene internal tandem duplications in juxtamembrane region            |
| <i>FLT3-TKD</i>                    | 1                 | 84                                       | <i>FLT3</i> gene point mutation in second tyrosine kinase domain                 |
| <i>good prognosis</i>              | 11                | 2177                                     | increased overall survival or disease free survival or response to therapy       |
| <i>high centrosome aberrations</i> | 1                 | 21                                       | high number of abnormal centrosomes                                              |
| <i>high RUNX3-ATRX ratio</i>       | 1                 | 13                                       | high <i>RUNX3</i> gene to <i>ATRX</i> gene ratio                                 |
| <i>human</i>                       | 25                | 15809                                    | human sample                                                                     |
| <i>inv(16)</i>                     | 9                 | 1748                                     | <i>inv(16)</i>                                                                   |
| <i>low centrosome aberrations</i>  | 1                 | 21                                       | low number of abnormal centrosomes                                               |
| <i>low RUNX3-ATRX ratio</i>        | 1                 | 13                                       | low <i>RUNX3</i> gene to <i>ATRX</i> gene ratio                                  |
| <i>microarray</i>                  | 25                | 15686                                    | microarray experiment                                                            |
| <i>MLL fusion gene</i>             | 2                 | 944                                      | <i>MLL</i> gene chimeric fusions                                                 |
| <i>MLL-PTD</i>                     | 1                 | 19                                       | <i>MLL</i> gene partial tandem duplications                                      |
| <i>monocytic</i>                   | 1                 | 50                                       | monocytic differentiation                                                        |
| <i>normal cytogenetics</i>         | 6                 | 925                                      | cytogenetically normal (CN) AML                                                  |
| <i>NPM1 mutation</i>               | 5                 | 1802                                     | <i>NPM1</i> gene mutation                                                        |
| <i>NRAS-PM</i>                     | 1                 | 67                                       | <i>NRAS</i> gene mutation                                                        |
| <i>patient</i>                     | 25                | 15809                                    | patient sample                                                                   |
| <i>pediatric</i>                   | 5                 | 4297                                     | less than 18 years of age                                                        |
| <i>poor prognosis</i>              | 12                | 2336                                     | decreased overall survival or disease free survival or response to therapy       |
| <i>prognosis</i>                   | 2                 | 138                                      | associated with overall survival or disease free survival or response to therapy |
| <i>RT-PCR</i>                      | 7                 | 123                                      | RT-PCR experiment                                                                |
| <i>t(11;19)</i>                    | 1                 | 10                                       | <i>t(11;19)</i>                                                                  |
| <i>t(15;17)</i>                    | 9                 | 401                                      | <i>t(15;17)</i>                                                                  |
| <i>t(8;14)</i>                     | 1                 | 15                                       | <i>t(8;14)</i>                                                                   |
| <i>t(8;21)</i>                     | 9                 | 1671                                     | <i>t(8;21)</i>                                                                   |
| <i>t(9;11)</i>                     | 1                 | 144                                      | <i>t(9;11)</i>                                                                   |
| <i>t(9;22)</i>                     | 1                 | 16                                       | <i>t(9;22)</i>                                                                   |
| <i>T-ALL</i>                       | 1                 | 15                                       | T-cell acute lymphocytic leukemia                                                |
| <i>trisomy 8</i>                   | 1                 | 14                                       | trisomy 8                                                                        |

Definitions of identification tags with associated studies and number of features.
