# Supplementary material for: Integrative Meta-Analysis of Differential Gene Expression in Acute Myeloid Leukemia
Source: PubMed Central journal article supplement (PMC2830886; doi:10.1371/journal.pone.0009466), 2010-03-01
Supplement: pone.0009466.s002.pdf [file pone.0009466.s002.pdf]

**Table S2. List of comparison conditions**

| Comparison condition                                                                                                                 | No. of references | No. of differentially expressed features |
|--------------------------------------------------------------------------------------------------------------------------------------|-------------------|------------------------------------------|
| <b>Baseline - none</b>                                                                                                               |                   |                                          |
| "11q23" vs "t(8;14)"                                                                                                                 | 1                 | 6                                        |
| "11q23" vs "t(9;22)"                                                                                                                 | 1                 | 8                                        |
| "11q23" vs "T-ALL"                                                                                                                   | 1                 | 6                                        |
| "AML" vs "ALL"                                                                                                                       | 1                 | 100                                      |
| "CBF" with "good prognosis" vs "CBF" with "poor prognosis"                                                                           | 1                 | 2310                                     |
| "CD34+CD38- fraction" vs "CD34+CD38+ fraction"                                                                                       | 1                 | 822                                      |
| "CEBPA silenced" vs "CEBPA mutation"                                                                                                 | 1                 | 608                                      |
| "euploid" vs "aneuploid"                                                                                                             | 1                 | 128                                      |
| "FLT3 mutation" with "good prognosis" and "low RUNX3-ATRX ratio" vs "FLT3 mutation" with "poor prognosis" and "high RUNX-ATRX ratio" | 1                 | 26                                       |
| "FLT3 mutation" with "good prognosis" vs "FLT3 mutation" with "poor prognosis"                                                       | 1                 | 260                                      |
| "FLT3-ITD" vs "FLT3-TKD"                                                                                                             | 1                 | 64                                       |
| "FLT3-ITD" vs "NRAS-PM"                                                                                                              | 1                 | 52                                       |
| "FLT3-TKD" vs "NRAS-PM"                                                                                                              | 1                 | 36                                       |
| "FLT3-ITD" vs "FLT3-ALM"                                                                                                             | 1                 | 46                                       |
| "good prognosis" vs "poor prognosis"                                                                                                 | 6                 | 884                                      |
| "inv(16)" vs "11q23"                                                                                                                 | 1                 | 8                                        |
| "inv(16)" vs "t(8;21)"                                                                                                               | 2                 | 52                                       |
| "inv(16)" vs "t(8;21)"                                                                                                               | 1                 | 1810                                     |
| "low centrosome aberrations" vs "high centrosome aberrations"                                                                        | 1                 | 42                                       |
| "normal cytogenetics" with "good prognosis" vs "normal cytogenetics" with "poor prognosis"                                           | 2                 | 394                                      |
| "t(15;17)" with "FAB-M3v" vs "t(15;17)" with "FAB-M3"                                                                                | 1                 | 20                                       |
| "t(15;17)" vs "11q23"                                                                                                                | 1                 | 8                                        |
| "t(15;17)" vs "inv(16)"                                                                                                              | 3                 | 104                                      |
| "t(15;17)" vs "t(8;21)"                                                                                                              | 2                 | 60                                       |
| "t(8;14)" vs "t(9;22)"                                                                                                               | 1                 | 8                                        |
| "t(8;14)" vs "T-ALL"                                                                                                                 | 1                 | 8                                        |
| "t(8;21)" vs "11q23"                                                                                                                 | 1                 | 8                                        |
| "t(9;22)" vs "T-ALL"                                                                                                                 | 1                 | 8                                        |
| "trisomy 8" vs "normal cytogenetics"                                                                                                 | 1                 | 28                                       |
| <b>Baseline - AML</b>                                                                                                                |                   |                                          |
| "11q23" cluster                                                                                                                      | 5                 | 531                                      |
| "abnormal cytogenetics" cluster                                                                                                      | 1                 | 150                                      |
| "AML" cluster                                                                                                                        | 1                 | 435                                      |
| "CBF" cluster                                                                                                                        | 1                 | 100                                      |
| "CEBPA mutation" cluster                                                                                                             | 1                 | 98                                       |
| "control" cluster                                                                                                                    | 1                 | 15                                       |
| "del(7q)" cluster                                                                                                                    | 1                 | 48                                       |
| "EV11 overexpression" cluster                                                                                                        | 1                 | 28                                       |
| "FAB" cluster                                                                                                                        | 1                 | 213                                      |
| "FAB-M4" and "FAB-M5" cluster                                                                                                        | 1                 | 40                                       |
| "FAB-M7" cluster                                                                                                                     | 1                 | 100                                      |
| "FLT3 mutation" cluster                                                                                                              | 2                 | 98                                       |
| "FLT3-ITD" cluster                                                                                                                   | 3                 | 193                                      |
| "good prognosis" and "normal cytogenetics" and "NPM1 mutation" cluster                                                               | 1                 | 156                                      |
| "inv(16)" subgroup cluster                                                                                                           | 1                 | 42                                       |
| "inv(16)" cluster                                                                                                                    | 7                 | 719                                      |
| "MLL fusion gene" cluster                                                                                                            | 2                 | 844                                      |
| "MLL-PTD" cluster                                                                                                                    | 1                 | 19                                       |
| "monocytic" cluster                                                                                                                  | 1                 | 50                                       |
| "normal cytogenetics" and "NPM1 mutation" cluster                                                                                    | 1                 | 40                                       |
| "normal cytogenetics" with "good prognosis" cluster                                                                                  | 1                 | 85                                       |
| "normal cytogenetics" with "poor prognosis" cluster                                                                                  | 1                 | 61                                       |
| "normal cytogenetics" with "prognosis" cluster                                                                                       | 1                 | 86                                       |
| "normal cytogenetics" cluster                                                                                                        | 3                 | 89                                       |
| "NPM1 mutation" and "FLT3-ITD" cluster                                                                                               | 1                 | 40                                       |
| "NPM1 mutation" cluster                                                                                                              | 3                 | 1566                                     |
| "poor prognosis" and "control" cluster                                                                                               | 1                 | 40                                       |
| "poor prognosis" cluster                                                                                                             | 1                 | 299                                      |
| "prognosis" cluster                                                                                                                  | 1                 | 50                                       |

|                                           |   |     |
|-------------------------------------------|---|-----|
| "t(11;19)" cluster                        | 1 | 10  |
| "t(15;17)" cluster                        | 7 | 295 |
| "t(8;21)" subgroup cluster                | 1 | 28  |
| "t(8;21)" cluster                         | 7 | 678 |
| "t(9;11)" cluster                         | 1 | 144 |
| "cluster 1" cluster                       | 1 | 39  |
| "cluster 16" cluster                      | 1 | 40  |
| "cluster 3" cluster                       | 1 | 40  |
| "cluster 4" cluster                       | 1 | 40  |
| "cluster 7" cluster                       | 1 | 40  |
| "cluster 8" cluster                       | 1 | 40  |
| "cluster E" cluster                       | 1 | 50  |
| <b>Baseline - ALL</b>                     |   |     |
| "11q23" cluster                           | 1 | 6   |
| "t(8;14)" cluster                         | 1 | 4   |
| "T-ALL" cluster                           | 1 | 4   |
| "t(9;22)" cluster                         | 1 | 4   |
| <b>Baseline - AML and ALL</b>             |   |     |
| "MLL fusion gene" cluster                 | 1 | 100 |
| <b>Baseline - Normal Cytogenetics AML</b> |   |     |
| "FLT3-ITD" cluster                        | 1 | 41  |
| "FLT3-TKD" cluster                        | 1 | 34  |
| "NRAS-PM" cluster                         | 1 | 23  |

Standardized annotation of experiment conditions organized by the baseline of the experiment. The number of studies and features associated with each comparison condition are listed. Identification tag descriptions can be found in Table S1.
