# Supplementary material for: Integrative Meta-Analysis of Differential Gene Expression in Acute Myeloid Leukemia
Source: PubMed Central journal article supplement (PMC2830886; doi:10.1371/journal.pone.0009466), 2010-03-01
Supplement: pone.0009466.s003.pdf [file pone.0009466.s003.pdf]

**Table S3. Expression summaries of HOX and TALE genes**

| Gene symbol | No. of references | No. of platforms | No. of differentially expressed features | Expression Summary                                                                                         |                                                                                                                                |                                                                                                   |
|-------------|-------------------|------------------|------------------------------------------|------------------------------------------------------------------------------------------------------------|--------------------------------------------------------------------------------------------------------------------------------|---------------------------------------------------------------------------------------------------|
|             |                   |                  |                                          | AML Baseline                                                                                               |                                                                                                                                | No Baseline<br>(bold tag is up-regulated)                                                         |
|             |                   |                  |                                          | up-regulated tags                                                                                          | down-regulated tags                                                                                                            |                                                                                                   |
| HOXB2       | 12                | 6                | 32                                       | <i>FLT3-ITD</i><br><i>NPM1 mutation</i><br><i>normal cytogenetics</i>                                      | <i>CEBPA mutation</i><br><i>MLL fusion gene</i><br><i>abnormal cytogenetics</i>                                                | <b><i>inv(16)</i></b> vs <i>t(15;17)</i><br><b><i>inv(16)</i></b> vs <i>t(8;21)</i><br>prognosis* |
| PBX3        | 12                | 5                | 31                                       | <i>MLL fusion gene</i><br><i>NPM1 mutation</i><br><i>normal cytogenetics</i>                               | <i>abnormal cytogenetics</i><br><i>inv(16)</i><br><i>t(15;17)</i><br><i>control</i>                                            | <b><i>inv(16)</i></b> vs <i>t(8;21)</i><br>prognosis*                                             |
| HOXA9       | 11                | 4                | 35                                       | <i>MLL fusion gene</i><br><i>11q23</i><br><i>NPM1 mutation</i><br><i>normal cytogenetics</i>               | <i>CEBPA mutation</i><br><i>t(8;21)</i><br><i>abnormal cytogenetics</i><br><i>inv(16)</i><br><i>t(15;17)</i><br><i>control</i> | <b>AML</b> vs <i>ALL</i>                                                                          |
| HOXB5       | 9                 | 5                | 32                                       | <i>NRAS-PM</i><br><i>FLT3-ITD</i><br><i>FLT3-TKD</i><br><i>normal cytogenetics</i><br><i>NPM1 mutation</i> | <i>CEBPA mutation</i><br><i>11q23</i><br><i>t(8;21)</i><br><i>inv(16)</i><br><i>t(15;17)</i>                                   | <b>poor prognosis</b> vs <i>good prognosis</i><br><b>euploid</b> vs <i>aneuploid</i>              |
| HOXA10      | 9                 | 4                | 34                                       | <i>MLL fusion gene</i><br><i>NPM1 mutation</i><br><i>normal cytogenetics</i>                               | <i>CEBPA mutation</i><br><i>abnormal cytogenetics</i><br><i>inv(16)</i><br><i>t(15;17)</i><br><i>control</i>                   | <b>poor prognosis</b> vs <i>good prognosis</i><br><b><i>inv(16)</i></b> vs. <i>t(15;17)</i>       |
| MEIS1       | 9                 | 3                | 16                                       | <i>MLL fusion gene</i><br><i>NPM1 mutation</i><br><i>normal cytogenetics</i><br><i>good prognosis</i>      | <i>CEBPA mutation</i><br><i>t(15;17)</i>                                                                                       | <b><i>inv(16)</i></b> vs <i>t(8;21)</i>                                                           |
| HOXA4       | 8                 | 4                | 18                                       | <i>MLL fusion gene</i><br><i>11q23</i><br><i>NPM1 mutation</i><br><i>normal cytogenetics</i>               | <i>t(8;21)</i><br><i>t(15;17)</i><br><i>inv(16)</i>                                                                            | <b>poor prognosis</b> vs <i>good prognosis</i>                                                    |
| HOXA5       | 6                 | 1                | 15                                       | <i>MLL fusion gene</i><br><i>NPM1 mutation</i><br><i>FLT3-ITD</i>                                          | <i>inv(16)</i><br><i>t(15;17)</i><br><i>control</i>                                                                            |                                                                                                   |
| HOXB6       | 5                 | 2                | 7                                        | <i>NPM1 mutation</i><br><i>FLT3-ITD</i>                                                                    |                                                                                                                                |                                                                                                   |
| HOXA7       | 5                 | 1                | 12                                       | <i>MLL fusion gene</i><br><i>NPM1 mutation</i>                                                             | <i>inv(16)</i><br><i>t(15;17)</i><br><i>control</i>                                                                            |                                                                                                   |
| PBX1        | 3                 | 3                | 3                                        | <i>t(11;19)</i><br><i>poor prognosis</i>                                                                   |                                                                                                                                |                                                                                                   |
| HOXA2       | 3                 | 2                | 4                                        | <i>NPM1 mutation</i><br><i>normal cytogenetics</i>                                                         | <i>t(15;17)</i>                                                                                                                |                                                                                                   |
| HOXA6       | 3                 | 1                | 6                                        | <i>MLL fusion gene</i><br><i>NPM1 mutation</i>                                                             |                                                                                                                                |                                                                                                   |
| HOXB3       | 3                 | 1                | 3                                        | <i>NPM1 mutation</i>                                                                                       |                                                                                                                                |                                                                                                   |
| PBX2        | 3                 | 1                | 3                                        |                                                                                                            | <i>MLL fusion gene</i><br><i>NPM1 mutation</i>                                                                                 |                                                                                                   |
| HOXB4       | 2                 | 2                | 4                                        | <i>NPM1 mutation</i><br><i>FLT3-ITD</i><br><i>normal cytogenetics</i>                                      |                                                                                                                                |                                                                                                   |
| HOXB9       | 2                 | 1                | 4                                        | <i>MLL fusion gene</i><br><i>NPM1 mutation</i>                                                             |                                                                                                                                |                                                                                                   |
| HOXA1       | 1                 | 1                | 2                                        | <i>NPM1 mutation</i>                                                                                       |                                                                                                                                |                                                                                                   |
| HOXB7       | 1                 | 1                | 2                                        | <i>NPM1 mutation</i>                                                                                       |                                                                                                                                |                                                                                                   |
| HOXA11      | 1                 | 1                | 1                                        | <i>NPM1 mutation</i>                                                                                       |                                                                                                                                |                                                                                                   |
| HOXA3       | 1                 | 1                | 1                                        | <i>NPM1 mutation</i>                                                                                       |                                                                                                                                |                                                                                                   |
| HOXC4       | 1                 | 1                | 1                                        |                                                                                                            | <i>NPM1 mutation</i>                                                                                                           |                                                                                                   |
| HOXC6       | 1                 | 1                | 1                                        |                                                                                                            |                                                                                                                                |                                                                                                   |
| HOXD4       | 1                 | 1                | 1                                        | <i>NPM1 mutation</i>                                                                                       |                                                                                                                                |                                                                                                   |

Listing of all HOX/TALE family genes in our analysis. Gene symbols are approved by HUGO Gene Nomenclature Committee. Identification tag descriptions can be found in Table S1.

\*Contradictory prognosis expression directions.
