# Supplementary material for: Integrative Meta-Analysis of Differential Gene Expression in Acute Myeloid Leukemia
Source: PubMed Central journal article supplement (PMC2830886; doi:10.1371/journal.pone.0009466), 2010-03-01
Supplement: pone.0009466.s005.pdf [file pone.0009466.s005.pdf]

**Table S5. Functional categories of up-regulated genes associated with poor prognosis**

| GO category                                                                                  | Corrected p-value | No. of genes | Other tags with upregulated genes                                                                                    | Other tags with downregulated genes                                                                                                                   |
|----------------------------------------------------------------------------------------------|-------------------|--------------|----------------------------------------------------------------------------------------------------------------------|-------------------------------------------------------------------------------------------------------------------------------------------------------|
| <b>Biological Processes</b>                                                                  |                   |              |                                                                                                                      |                                                                                                                                                       |
| cell cycle                                                                                   | 2.49E-15          | 50           | <i>abnormal cytogenetics</i><br><i>aneuploid</i><br><i>CD34+CD38+ fraction</i><br><i>high centrosome aberrations</i> | <i>CD34+CD38- fraction</i><br><i>euploid</i><br><i>FLT3-ITD</i><br><i>low centrosome aberrations</i><br><i>MLL fusion gene</i>                        |
| cell cycle process                                                                           | 8.04E-12          | 33           | <i>aneuploid</i><br><i>CD34+CD38+ fraction</i><br><i>high centrosome aberrations</i>                                 | <i>CD34+CD38- fraction</i><br><i>euploid</i><br><i>FLT3-ITD</i><br><i>good prognosis</i><br><i>low centrosome aberrations</i><br><i>NPM1 mutation</i> |
| mitotic cell cycle                                                                           | 6.61E-10          | 26           | <i>aneuploid</i><br><i>CD34+CD38+ fraction</i><br><i>high centrosome aberrations</i>                                 | <i>CD34+CD38- fraction</i><br><i>euploid</i><br><i>FLT3-ITD</i><br><i>good prognosis</i><br><i>low centrosome aberrations</i><br><i>NPM1 mutation</i> |
| cell cycle phase                                                                             | 6.37E-09          | 26           | <i>aneuploid</i><br><i>CD34+CD38+ fraction</i><br><i>high centrosome aberrations</i>                                 | <i>CD34+CD38- fraction</i><br><i>euploid</i><br><i>FLT3-ITD</i><br><i>good prognosis</i><br><i>low centrosome aberrations</i><br><i>NPM1 mutation</i> |
| cell division                                                                                | 2.18E-08          | 21           | <i>aneuploid</i><br><i>CD34+CD38+ fraction</i><br><i>high centrosome aberrations</i>                                 | <i>CD34+CD38- fraction</i><br><i>euploid</i><br><i>good prognosis</i><br><i>low centrosome aberrations</i><br><i>NPM1 mutation</i>                    |
| mitosis                                                                                      | 4.00E-08          | 20           | <i>aneuploid</i><br><i>CD34+CD38+ fraction</i>                                                                       | <i>CD34+CD38- fraction</i><br><i>euploid</i><br><i>FLT3-ITD</i><br><i>good prognosis</i><br><i>NPM1 mutation</i>                                      |
| M phase of mitotic cell cycle                                                                | 6.37E-08          | 20           | <i>aneuploid</i><br><i>CD34+CD38+ fraction</i>                                                                       | <i>CD34+CD38- fraction</i><br><i>euploid</i><br><i>FLT3-ITD</i><br><i>good prognosis</i><br><i>NPM1 mutation</i>                                      |
| regulation of cell cycle                                                                     | 2.91E-07          | 21           | <i>abnormal cytogenetics</i><br><i>aneuploid</i><br><i>CD34+CD38+ fraction</i><br><i>high centrosome aberrations</i> | <i>CD34+CD38- fraction</i><br><i>euploid</i><br><i>good prognosis</i><br><i>low centrosome aberrations</i>                                            |
| M phase                                                                                      | 8.37E-07          | 21           | <i>aneuploid</i><br><i>CD34+CD38+ fraction</i>                                                                       | <i>CD34+CD38- fraction</i><br><i>euploid</i><br><i>good prognosis</i><br><i>NPM1 mutation</i>                                                         |
| negative regulation of transcription                                                         | 3.84E-06          | 20           | <i>good prognosis</i>                                                                                                |                                                                                                                                                       |
| negative regulation of nucleobase, nucleoside, nucleotide and nucleic acid metabolic process | 4.31E-06          | 21           | <i>good prognosis</i>                                                                                                |                                                                                                                                                       |
| interphase of mitotic cell cycle                                                             | 1.90E-04          | 10           | <i>aneuploid</i><br><i>CD34+CD38+ fraction</i><br><i>high centrosome aberrations</i>                                 | <i>CD34+CD38- fraction</i><br><i>euploid</i><br><i>good prognosis</i><br><i>low centrosome aberrations</i><br><i>NPM1 mutation</i>                    |
| regulation of cellular component organization and biogenesis                                 | 3.20E-04          | 17           |                                                                                                                      |                                                                                                                                                       |
| interphase                                                                                   | 3.70E-04          | 10           | <i>aneuploid</i><br><i>CD34+CD38+ fraction</i><br><i>high centrosome aberrations</i>                                 | <i>CD34+CD38- fraction</i><br><i>euploid</i><br><i>good prognosis</i><br><i>low centrosome aberrations</i><br><i>NPM1 mutation</i>                    |
| organelle organization and biogenesis                                                        | 1.47E-03          | 45           | <i>aneuploid</i>                                                                                                     | <i>euploid</i>                                                                                                                                        |

|                                                        |          |    |                                                                                        |                                                                              |
|--------------------------------------------------------|----------|----|----------------------------------------------------------------------------------------|------------------------------------------------------------------------------|
| G1 phase of mitotic cell cycle                         | 1.85E-03 | 5  | <i>CD34+CD38+ fraction</i>                                                             | <i>CD34+CD38- fraction</i><br><i>good prognosis</i>                          |
| regulation of organelle organization and biogenesis    | 1.95E-03 | 10 |                                                                                        |                                                                              |
| organic acid metabolic process                         | 1.95E-03 | 28 |                                                                                        | <i>good prognosis</i>                                                        |
| microtubule-based process                              | 2.00E-03 | 19 |                                                                                        |                                                                              |
| DNA metabolic process                                  | 2.46E-03 | 30 | <i>abnormal cytogenetics</i><br><i>aneuploid</i><br><i>high centrosome aberrations</i> | <i>euploid</i><br><i>good prognosis</i><br><i>low centrosome aberrations</i> |
| G1 phase                                               | 4.49E-03 | 5  | <i>CD34+CD38+ fraction</i>                                                             | <i>CD34+CD38- fraction</i><br><i>good prognosis</i>                          |
| carboxylic acid metabolic process                      | 5.34E-03 | 27 |                                                                                        | <i>good prognosis</i>                                                        |
| regulation of cytoskeleton organization and biogenesis | 5.74E-03 | 9  |                                                                                        |                                                                              |

### Cellular Components

|                                            |          |    |                                                                                                                          |                                                                                               |
|--------------------------------------------|----------|----|--------------------------------------------------------------------------------------------------------------------------|-----------------------------------------------------------------------------------------------|
| microtubule cytoskeleton                   | 3.65E-06 | 26 | <i>aneuploid</i><br><i>CD34+CD38+ fraction</i>                                                                           | <i>CD34+CD38- fraction</i><br><i>euploid</i><br><i>good prognosis</i>                         |
| spindle                                    | 2.68E-05 | 10 | <i>aneuploid</i><br><i>CD34+CD38+ fraction</i>                                                                           | <i>CD34+CD38- fraction</i><br><i>euploid</i><br><i>good prognosis</i><br><i>NPM1 mutation</i> |
| protein complex                            | 8.99E-05 | 73 | <i>aneuploid</i><br><i>high centrosome aberrations</i>                                                                   | <i>euploid</i><br><i>good prognosis</i><br><i>low centrosome aberrations</i>                  |
| mitochondrion                              | 3.30E-04 | 34 | <i>MLL fusion gene</i>                                                                                                   | <i>good prognosis</i>                                                                         |
| non-membrane-bound organelle               | 2.30E-03 | 68 | <i>aneuploid</i>                                                                                                         | <i>euploid</i>                                                                                |
| intracellular non-membrane-bound organelle | 2.30E-03 | 68 | <i>aneuploid</i>                                                                                                         | <i>euploid</i>                                                                                |
| plasma membrane part                       | 7.59E-03 | 54 | <i>11q23</i><br><i>CBF</i><br><i>CEBPA silenced</i><br><i>FAB-M4</i><br><i>FAB-M5</i><br><i>FAB-M7</i><br><i>inv(16)</i> | <i>CEBPA mutation</i><br><i>t(15;17)</i><br><i>good prognosis</i>                             |
| microtubule organizing center              | 7.77E-03 | 10 | <i>aneuploid</i><br><i>CD34+CD38+ fraction</i>                                                                           | <i>CD34+CD38- fraction</i><br><i>euploid</i><br><i>good prognosis</i>                         |
| organelle outer membrane                   | 9.09E-03 | 8  |                                                                                                                          |                                                                                               |

Significantly over-represented functional gene ontology (GO) categories of up-regulated genes associated with poor prognosis are presented here. GO categories that are also over-represented in down-regulated genes associated with poor prognosis are not included. Corrected p-value is the Bonferroni multiple hypothesis. Identification tags that are both up-regulated and down-regulated are not included in the 'other tags' columns. Identification tag descriptions can be found in Table S1.
