# Supplementary material for: Integrative Meta-Analysis of Differential Gene Expression in Acute Myeloid Leukemia
Source: PubMed Central journal article supplement (PMC2830886; doi:10.1371/journal.pone.0009466), 2010-03-01
Supplement: pone.0009466.s006.pdf [file pone.0009466.s006.pdf]

**Table S6. Functional categories of down-regulated genes associated with poor prognosis**

| GO category                                                           | Corrected p-value | No. of genes | Other tags with downregulated genes                                                           | Other tags with upregulated genes                                                                                            |
|-----------------------------------------------------------------------|-------------------|--------------|-----------------------------------------------------------------------------------------------|------------------------------------------------------------------------------------------------------------------------------|
| <b>Biological Processes</b>                                           |                   |              |                                                                                               |                                                                                                                              |
| protein kinase cascade                                                | 7.86E-15          | 44           |                                                                                               | <i>good prognosis</i><br><i>MLL fusion gene</i><br><i>NPM1 mutation</i>                                                      |
| intracellular signaling cascade                                       | 1.96E-14          | 114          | <i>t(8;21)</i>                                                                                | <i>good prognosis</i><br><i>inv(16)</i><br><i>MLL fusion gene</i><br><i>NPM1 mutation</i>                                    |
| transcription from RNA polymerase II promoter                         | 1.88E-12          | 54           | <i>del(7q)</i><br><i>MLL fusion gene</i><br><i>t(8;21)</i>                                    | <i>abnormal cytogenetics</i><br><i>good prognosis</i><br><i>inv(16)</i><br><i>NPM1 mutation</i>                              |
| signal transduction                                                   | 3.97E-12          | 211          | <i>CD34+CD38- fraction</i><br><i>CEBPA mutation</i><br><i>FLT3 mutation</i><br><i>t(8;21)</i> | <i>CD34+CD38+ fraction</i><br><i>good prognosis</i><br><i>inv(16)</i><br><i>normal cytogenetics</i>                          |
| negative regulation of developmental process                          | 7.73E-12          | 37           | <i>FLT3 mutation</i>                                                                          | <i>good prognosis</i><br><i>NPM1 mutation</i>                                                                                |
| cell communication                                                    | 9.13E-12          | 222          | <i>CD34+CD38- fraction</i><br><i>CEBPA mutation</i><br><i>t(8;21)</i>                         | <i>CD34+CD38+ fraction</i><br><i>CEBPA silenced</i><br><i>good prognosis</i><br><i>inv(16)</i><br><i>normal cytogenetics</i> |
| negative regulation of apoptosis                                      | 3.74E-10          | 29           |                                                                                               | <i>good prognosis</i><br><i>NPM1 mutation</i>                                                                                |
| negative regulation of programmed cell death                          | 5.23E-10          | 29           |                                                                                               | <i>good prognosis</i><br><i>NPM1 mutation</i>                                                                                |
| positive regulation of metabolic process                              | 2.46E-09          | 38           | <i>low centrosome aberrations</i>                                                             | <i>good prognosis</i><br><i>high centrosome aberrations</i><br><i>inv(16)</i>                                                |
| RNA metabolic process                                                 | 3.74E-09          | 171          |                                                                                               | <i>abnormal cytogenetics</i><br><i>good prognosis</i><br><i>NPM1 mutation</i>                                                |
| macromolecule localization                                            | 3.61E-08          | 64           |                                                                                               | <i>good prognosis</i><br><i>MLL fusion gene</i>                                                                              |
| protein localization                                                  | 9.25E-08          | 61           |                                                                                               | <i>good prognosis</i><br><i>MLL fusion gene</i>                                                                              |
| regulation of cell proliferation                                      | 1.06E-07          | 38           | <i>CD34+CD38+ fraction</i><br><i>euploid</i><br><i>t(8;21)</i>                                | <i>aneuploid</i><br><i>CD34+CD38- fraction</i><br><i>good prognosis</i><br><i>MLL fusion gene</i><br><i>NPM1 mutation</i>    |
| nucleobase, nucleoside, nucleotide and nucleic acid metabolic process | 1.43E-07          | 208          |                                                                                               | <i>abnormal cytogenetics</i><br><i>good prognosis</i><br><i>NPM1 mutation</i>                                                |
| regulation of metabolic process                                       | 1.95E-07          | 165          | <i>CEBPA mutation</i><br><i>low centrosome aberrations</i><br><i>t(15;17)</i>                 | <i>good prognosis</i><br><i>high centrosome aberrations</i><br><i>NPM1 mutation</i>                                          |
| regulation of cellular metabolic process                              | 2.25E-07          | 161          | <i>CEBPA mutation</i><br><i>low centrosome aberrations</i><br><i>t(15;17)</i>                 | <i>good prognosis</i><br><i>high centrosome aberrations</i><br><i>NPM1 mutation</i>                                          |
| multi-organism process                                                | 1.25E-06          | 29           | <i>CD34+CD38- fraction</i>                                                                    | <i>CD34+CD38+ fraction</i><br><i>FAB-M4</i><br><i>FAB-M5</i><br><i>good prognosis</i><br><i>NPM1 mutation</i>                |
| positive regulation of transcription, DNA-dependent                   | 1.32E-06          | 24           |                                                                                               | <i>good prognosis</i>                                                                                                        |
| positive regulation of RNA metabolic process                          | 1.58E-06          | 24           |                                                                                               | <i>good prognosis</i>                                                                                                        |

|                                                                                              |          |     |                                                                |                                                                                                                                       |
|----------------------------------------------------------------------------------------------|----------|-----|----------------------------------------------------------------|---------------------------------------------------------------------------------------------------------------------------------------|
| positive regulation of transcription                                                         | 1.63E-06 | 27  | <i>low centrosome aberrations</i>                              | <i>good prognosis<br/>high centrosome aberrations</i>                                                                                 |
| protein transport                                                                            | 2.15E-06 | 54  |                                                                | <i>good prognosis<br/>MLL fusion gene</i>                                                                                             |
| cellular localization                                                                        | 2.75E-06 | 64  |                                                                | <i>good prognosis<br/>MLL fusion gene</i>                                                                                             |
| response to external stimulus                                                                | 3.41E-06 | 43  | <i>CD34+CD38- fraction<br/>control<br/>del(7q)<br/>t(8;21)</i> | <i>CD34+CD38+ fraction<br/>good prognosis<br/>inv(16)<br/>MLL fusion gene<br/>monocytic<br/>normal cytogenetics<br/>NPM1 mutation</i> |
| positive regulation of nucleobase, nucleoside, nucleotide and nucleic acid metabolic process | 4.04E-06 | 27  | <i>low centrosome aberrations</i>                              | <i>good prognosis<br/>high centrosome aberrations<br/>inv(16)</i>                                                                     |
| establishment of protein localization                                                        | 5.13E-06 | 55  |                                                                | <i>good prognosis<br/>MLL fusion gene</i>                                                                                             |
| anti-apoptosis                                                                               | 7.03E-06 | 20  |                                                                | <i>good prognosis<br/>NPM1 mutation</i>                                                                                               |
| regulation of gene expression                                                                | 8.13E-06 | 149 | <i>abnormal cytogenetics<br/>CEBPA mutation<br/>t(15;17)</i>   | <i>good prognosis<br/>NPM1 mutation</i>                                                                                               |
| ubiquitin cycle                                                                              | 1.09E-05 | 38  |                                                                | <i>good prognosis</i>                                                                                                                 |
| localization                                                                                 | 1.17E-05 | 172 | <i>t(8;21)</i>                                                 | <i>FAB-M7<br/>good prognosis<br/>inv(16)<br/>MLL fusion gene</i>                                                                      |
| anatomical structure morphogenesis                                                           | 2.44E-05 | 50  | <i>t(15;17)<br/>t(8;21)</i>                                    | <i>FLT3-ITD<br/>FLT3 mutation<br/>good prognosis<br/>MLL fusion gene<br/>normal cytogenetics</i>                                      |
| regulation of transcription, DNA-dependent                                                   | 2.75E-05 | 132 | <i>abnormal cytogenetics<br/>CEBPA mutation</i>                | <i>good prognosis</i>                                                                                                                 |
| enzyme linked receptor protein signaling pathway                                             | 3.16E-05 | 26  |                                                                | <i>good prognosis</i>                                                                                                                 |
| regulation of RNA metabolic process                                                          | 3.61E-05 | 132 | <i>abnormal cytogenetics<br/>CEBPA mutation</i>                | <i>good prognosis</i>                                                                                                                 |
| transcription, DNA-dependent                                                                 | 3.71E-05 | 134 | <i>abnormal cytogenetics<br/>CEBPA mutation</i>                | <i>good prognosis<br/>NPM1 mutation</i>                                                                                               |
| transcription                                                                                | 3.95E-05 | 145 | <i>abnormal cytogenetics<br/>CEBPA mutation</i>                | <i>good prognosis<br/>NPM1 mutation</i>                                                                                               |
| response to molecule of bacterial origin                                                     | 4.09E-05 | 6   |                                                                | <i>good prognosis<br/>NPM1 mutation</i>                                                                                               |
| RNA biosynthetic process                                                                     | 4.18E-05 | 134 | <i>abnormal cytogenetics<br/>CEBPA mutation</i>                | <i>good prognosis<br/>NPM1 mutation</i>                                                                                               |
| hemopoietic or lymphoid organ development                                                    | 4.27E-05 | 19  | <i>NPM1 mutation</i>                                           | <i>good prognosis<br/>inv(16)</i>                                                                                                     |
| gene expression                                                                              | 4.54E-05 | 191 |                                                                | <i>abnormal cytogenetics<br/>good prognosis</i>                                                                                       |
| hemopoiesis                                                                                  | 7.32E-05 | 18  | <i>NPM1 mutation</i>                                           | <i>good prognosis<br/>inv(16)</i>                                                                                                     |
| regulation of nucleobase, nucleoside, nucleotide and nucleic acid metabolic process          | 7.96E-05 | 141 | <i>abnormal cytogenetics<br/>CEBPA mutation</i>                | <i>good prognosis<br/>NPM1 mutation</i>                                                                                               |
| establishment of cellular localization                                                       | 8.87E-05 | 59  |                                                                | <i>good prognosis<br/>MLL fusion gene</i>                                                                                             |
| immune system development                                                                    | 9.70E-05 | 19  |                                                                | <i>good prognosis<br/>inv(16)</i>                                                                                                     |
| response to other organism                                                                   | 1.20E-04 | 20  | <i>CD34+CD38- fraction</i>                                     | <i>CD34+CD38+ fraction<br/>FAB-M4<br/>FAB-M5<br/>good prognosis<br/>NPM1 mutation</i>                                                 |

|                                              |          |     |                                                        |                                                                                                               |
|----------------------------------------------|----------|-----|--------------------------------------------------------|---------------------------------------------------------------------------------------------------------------|
| response to wounding                         | 1.30E-04 | 31  | <i>CD34+CD38- fraction control t(8;21)</i>             | <i>CD34+CD38+ fraction good prognosis inv(16) MLL fusion gene monocytic normal cytogenetics NPM1 mutation</i> |
| mRNA metabolic process                       | 1.40E-04 | 27  |                                                        | <i>good prognosis</i>                                                                                         |
| regulation of transcription                  | 1.40E-04 | 138 | <i>abnormal cytogenetics CEBPA mutation</i>            | <i>good prognosis NPM1 mutation</i>                                                                           |
| positive regulation of developmental process | 1.50E-04 | 27  | <i>t(8;21)</i>                                         | <i>good prognosis inv(16) MLL fusion gene</i>                                                                 |
| regulation of signal transduction            | 1.50E-04 | 46  |                                                        | <i>good prognosis</i>                                                                                         |
| vesicle-mediated transport                   | 1.80E-04 | 38  | <i>t(8;21)</i>                                         | <i>inv(16) MLL fusion gene</i>                                                                                |
| protein complex assembly                     | 2.00E-04 | 27  |                                                        |                                                                                                               |
| intracellular transport                      | 2.30E-04 | 51  |                                                        | <i>good prognosis</i>                                                                                         |
| positive regulation of cell proliferation    | 2.80E-04 | 21  | <i>t(8;21)</i>                                         | <i>inv(16) MLL fusion gene NPM1 mutation</i>                                                                  |
| mRNA processing                              | 3.50E-04 | 23  |                                                        | <i>good prognosis</i>                                                                                         |
| localization of cell                         | 3.70E-04 | 28  | <i>CD34+CD38- fraction normal cytogenetics t(8;21)</i> | <i>CD34+CD38+ fraction good prognosis inv(16) MLL fusion gene NPM1 mutation</i>                               |
| cell motility                                | 3.70E-04 | 28  | <i>CD34+CD38- fraction normal cytogenetics t(8;21)</i> | <i>CD34+CD38+ fraction good prognosis inv(16) MLL fusion gene NPM1 mutation</i>                               |
| lipid metabolic process                      | 4.10E-04 | 50  |                                                        | <i>MLL fusion gene</i>                                                                                        |
| positive regulation of signal transduction   | 4.60E-04 | 17  |                                                        | <i>good prognosis MLL fusion gene NPM1 mutation</i>                                                           |
| response to biotic stimulus                  | 6.60E-04 | 23  | <i>CD34+CD38- fraction</i>                             | <i>CD34+CD38+ fraction good prognosis NPM1 mutation</i>                                                       |
| response to hormone stimulus                 | 7.60E-04 | 12  |                                                        |                                                                                                               |
| regulation of biological quality             | 8.30E-04 | 55  | <i>t(8;21)</i>                                         | <i>FAB-M7 good prognosis MLL fusion gene t(8;14)</i>                                                          |
| organ morphogenesis                          | 9.60E-04 | 26  | <i>t(8;21)</i>                                         | <i>good prognosis inv(16) normal cytogenetics NPM1 mutation</i>                                               |
| nervous system development                   | 1.07E-03 | 40  | <i>CD34+CD38+ fraction inv(16) NPM1 mutation</i>       | <i>CD34+CD38- fraction good prognosis</i>                                                                     |
| protein targeting                            | 1.97E-03 | 19  |                                                        | <i>good prognosis</i>                                                                                         |
| response to hypoxia                          | 2.06E-03 | 9   |                                                        | <i>good prognosis</i>                                                                                         |
| response to endogenous stimulus              | 2.22E-03 | 33  | <i>euploid low centrosome aberrations</i>              | <i>abnormal cytogenetics aneuploid good prognosis high centrosome aberrations</i>                             |
| RNA splicing                                 | 3.14E-03 | 19  |                                                        | <i>good prognosis</i>                                                                                         |
| response to chemical stimulus                | 4.65E-03 | 34  | <i>11q23 CD34+CD38- fraction t(8;21)</i>               | <i>CD34+CD38+ fraction good prognosis inv(16) normal cytogenetics NPM1 mutation</i>                           |

|                                                                      |          |    |                                                          |                                                                                                                              |
|----------------------------------------------------------------------|----------|----|----------------------------------------------------------|------------------------------------------------------------------------------------------------------------------------------|
| defense response                                                     | 4.99E-03 | 34 | <i>CD34+CD38- fraction<br/>t(8;21)</i>                   | 11q23<br><i>CD34+CD38+ fraction<br/>good prognosis<br/>inv(16)<br/>MLL fusion gene<br/>monocytic<br/>normal cytogenetics</i> |
| I-kappaB kinase/NF-kappaB cascade                                    | 6.01E-03 | 14 |                                                          | <i>good prognosis<br/>MLL fusion gene<br/>NPM1 mutation</i>                                                                  |
| membrane organization and biogenesis                                 | 6.46E-03 | 21 | <i>CD34+CD38- fraction<br/>NPM1 mutation<br/>t(8;21)</i> | <i>CD34+CD38+ fraction<br/>inv(16)<br/>MLL fusion gene</i>                                                                   |
| nuclear transport                                                    | 6.53E-03 | 15 |                                                          | <i>good prognosis</i>                                                                                                        |
| positive regulation of transcription from RNA polymerase II promoter | 6.55E-03 | 14 |                                                          | <i>good prognosis</i>                                                                                                        |
| mRNA transport                                                       | 6.78E-03 | 11 |                                                          | <i>good prognosis</i>                                                                                                        |
| immune response-regulating signal transduction                       | 8.01E-03 | 7  |                                                          | <i>good prognosis</i>                                                                                                        |
| cellular lipid metabolic process                                     | 8.15E-03 | 40 |                                                          | <i>MLL fusion gene</i>                                                                                                       |

### Molecular Functions

|                                          |          |     |                                                                           |                                                     |
|------------------------------------------|----------|-----|---------------------------------------------------------------------------|-----------------------------------------------------|
| transcription factor binding             | 2.99E-10 | 39  |                                                                           | <i>good prognosis<br/>NPM1 mutation</i>             |
| transcription cofactor activity          | 5.79E-09 | 31  |                                                                           | <i>good prognosis</i>                               |
| transcription activator activity         | 1.22E-08 | 31  | <i>t(8;21)</i>                                                            | <i>good prognosis<br/>inv(16)<br/>NPM1 mutation</i> |
| RNA binding                              | 5.25E-08 | 59  |                                                                           | <i>good prognosis</i>                               |
| transcription coactivator activity       | 7.18E-08 | 23  | <i>t(8;21)</i>                                                            | <i>good prognosis<br/>inv(16)</i>                   |
| transcription regulator activity         | 7.05E-05 | 91  | <i>abnormal cytogenetics<br/>control<br/>MLL fusion gene<br/>t(15;17)</i> | <i>good prognosis<br/>NPM1 mutation</i>             |
| receptor signaling protein activity      | 1.10E-04 | 18  |                                                                           | <i>good prognosis<br/>MLL fusion gene</i>           |
| enzyme binding                           | 1.30E-04 | 24  |                                                                           | <i>good prognosis</i>                               |
| transcription repressor activity         | 1.59E-03 | 18  |                                                                           | <i>good prognosis</i>                               |
| DNA binding                              | 2.03E-03 | 127 | <i>abnormal cytogenetics</i>                                              | <i>good prognosis<br/>NPM1 mutation</i>             |
| RNA helicase activity                    | 2.16E-03 | 7   |                                                                           |                                                     |
| molecular adaptor activity               | 4.81E-03 | 9   |                                                                           | <i>good prognosis</i>                               |
| protein serine/threonine kinase activity | 7.93E-03 | 36  | <i>euploid</i>                                                            | <i>aneuploid<br/>good prognosis</i>                 |

### Cellular Components

|                     |          |    |                                                           |                                                                                                                                      |
|---------------------|----------|----|-----------------------------------------------------------|--------------------------------------------------------------------------------------------------------------------------------------|
| nuclear body        | 6.21E-09 | 19 |                                                           | <i>good prognosis</i>                                                                                                                |
| Golgi apparatus     | 2.23E-08 | 49 | <i>t(8;21)</i>                                            | <i>good prognosis<br/>inv(16)<br/>MLL fusion gene</i>                                                                                |
| organelle membrane  | 4.49E-08 | 80 | <i>t(8;21)</i>                                            | <i>MLL fusion gene</i>                                                                                                               |
| nuclear speck       | 2.67E-07 | 15 |                                                           | <i>good prognosis</i>                                                                                                                |
| endomembrane system | 6.15E-07 | 59 | <i>CEBPA mutation<br/>t(8;21)</i>                         | <i>CEBPA silenced<br/>good prognosis<br/>inv(16)<br/>MLL fusion gene<br/>NPM1 mutation</i>                                           |
| vacuole             | 2.30E-04 | 20 | <i>CD34+CD38- fraction<br/>CEBPA silenced<br/>t(8;21)</i> | <i>CD34+CD38+ fraction<br/>CEBPA mutation<br/>FAB-M4<br/>FAB-M5<br/>good prognosis<br/>inv(16)<br/>MLL fusion gene<br/>monocytic</i> |

|                       |          |    |                                                                       |                                                                                                                                                                                |
|-----------------------|----------|----|-----------------------------------------------------------------------|--------------------------------------------------------------------------------------------------------------------------------------------------------------------------------|
| lysosome              | 4.40E-04 | 18 | <i>CD34+CD38- fraction</i><br><i>CEBPA silenced</i><br><i>t(8;21)</i> | <i>CD34+CD38+ fraction</i><br><i>CEBPA mutation</i><br><i>FAB-M4</i><br><i>FAB-M5</i><br><i>good prognosis</i><br><i>inv(16)</i><br><i>MLL fusion gene</i><br><i>monocytic</i> |
| Golgi membrane        | 4.70E-04 | 26 | <i>t(8;21)</i>                                                        | <i>inv(16)</i>                                                                                                                                                                 |
| lytic vacuole         | 5.40E-04 | 18 | <i>CD34+CD38- fraction</i><br><i>CEBPA silenced</i><br><i>t(8;21)</i> | <i>CD34+CD38+ fraction</i><br><i>CEBPA mutation</i><br><i>FAB-M4</i><br><i>FAB-M5</i><br><i>good prognosis</i><br><i>inv(16)</i><br><i>MLL fusion gene</i><br><i>monocytic</i> |
| endoplasmic reticulum | 1.10E-03 | 45 | <i>t(8;21)</i>                                                        | <i>CEBPA silenced</i><br><i>MLL fusion gene</i>                                                                                                                                |
| cellular_component    | 1.54E-03 | 40 |                                                                       | <i>good prognosis</i>                                                                                                                                                          |
| endosome              | 1.94E-03 | 17 |                                                                       | <i>good prognosis</i><br><i>MLL fusion gene</i>                                                                                                                                |
| Golgi apparatus part  | 2.10E-03 | 27 | <i>t(8;21)</i>                                                        | <i>inv(16)</i><br><i>MLL fusion gene</i>                                                                                                                                       |

Significantly over-represented functional gene ontology (GO) categories of down-regulated genes associated with poor prognosis are presented here. GO categories that are also over-represented in up-regulated genes associated with poor prognosis are not included. Corrected p-value is the Bonferroni multiple hypothesis. Identification tags that are both up-regulated and down-regulated are not included in the 'other tags' columns. Identification tag descriptions can be found in Table S1.
