# Supplementary material for: Integrative Meta-Analysis of Differential Gene Expression in Acute Myeloid Leukemia
Source: PubMed Central journal article supplement (PMC2830886; doi:10.1371/journal.pone.0009466), 2010-03-01
Supplement: pone.0009466.s007.pdf [file pone.0009466.s007.pdf]

**Table S7. Functional categories of up-regulated genes associated with good prognosis**

| GO category                                                           | Corrected p-value | No. of genes | Other tags with upregulated genes                                                                                                                              | Other tags with downregulated genes                                                                                                                                     |
|-----------------------------------------------------------------------|-------------------|--------------|----------------------------------------------------------------------------------------------------------------------------------------------------------------|-------------------------------------------------------------------------------------------------------------------------------------------------------------------------|
| <b>Biological Processes</b>                                           |                   |              |                                                                                                                                                                |                                                                                                                                                                         |
| regulation of cellular process                                        | 6.66E-25          | 266          | <i>aneuploid</i><br><i>CD34+CD38+ fraction</i><br><i>CEBPA silenced</i><br><i>high centrosome aberrations</i><br><i>inv(16)</i><br><i>MLL fusion gene</i>      | <i>CD34+CD38- fraction</i><br><i>CEBPA mutation</i><br><i>euploid</i><br><i>FLT3 mutation</i><br><i>low centrosome aberrations</i><br><i>t(15;17)</i><br><i>t(8;21)</i> |
| positive regulation of biological process                             | 5.00E-22          | 91           | <i>aneuploid</i><br><i>CD34+CD38+ fraction</i><br><i>high centrosome aberrations</i><br><i>inv(16)</i>                                                         | <i>CD34+CD38- fraction</i><br><i>CEBPA mutation</i><br><i>euploid</i><br><i>low centrosome aberrations</i><br><i>t(8;21)</i>                                            |
| positive regulation of cellular process                               | 2.00E-21          | 86           | <i>aneuploid</i><br><i>CD34+CD38+ fraction</i><br><i>high centrosome aberrations</i><br><i>inv(16)</i><br><i>MLL fusion gene</i><br><i>normal cytogenetics</i> | <i>CD34+CD38- fraction</i><br><i>euploid</i><br><i>low centrosome aberrations</i><br><i>t(8;21)</i>                                                                     |
| transcription from RNA polymerase II promoter                         | 9.14E-18          | 62           | <i>abnormal cytogenetics</i><br><i>inv(16)</i><br><i>NPM1 mutation</i>                                                                                         | <i>del(7q)</i><br><i>MLL fusion gene</i><br><i>poor prognosis</i><br><i>t(8;21)</i>                                                                                     |
| regulation of developmental process                                   | 9.57E-17          | 70           | <i>CD34+CD38+ fraction</i><br><i>CEBPA silenced</i><br><i>inv(16)</i><br><i>MLL fusion gene</i>                                                                | <i>CD34+CD38- fraction</i><br><i>CEBPA mutation</i><br><i>t(8;21)</i>                                                                                                   |
| protein kinase cascade                                                | 9.58E-16          | 45           | <i>MLL fusion gene</i><br><i>NPM1 mutation</i>                                                                                                                 | <i>poor prognosis</i>                                                                                                                                                   |
| multicellular organismal process                                      | 1.99E-15          | 174          | <i>11q23</i><br><i>FAB-M4</i><br><i>FAB-M5</i><br><i>FAB-M7</i><br><i>FLT3-ITD</i><br><i>FLT3 mutation</i>                                                     | <i>CEBPA mutation</i><br><i>control</i><br><i>del(7q)</i><br><i>t(8;21)</i>                                                                                             |
| RNA metabolic process                                                 | 1.42E-14          | 187          | <i>abnormal cytogenetics</i><br><i>NPM1 mutation</i>                                                                                                           | <i>poor prognosis</i>                                                                                                                                                   |
| intracellular signaling cascade                                       | 2.48E-14          | 113          | <i>inv(16)</i><br><i>MLL fusion gene</i><br><i>NPM1 mutation</i>                                                                                               | <i>poor prognosis</i><br><i>t(8;21)</i>                                                                                                                                 |
| signal transduction                                                   | 7.34E-14          | 215          | <i>CD34+CD38+ fraction</i><br><i>inv(16)</i><br><i>normal cytogenetics</i>                                                                                     | <i>CD34+CD38- fraction</i><br><i>CEBPA mutation</i><br><i>FLT3 mutation</i><br><i>poor prognosis</i><br><i>t(8;21)</i>                                                  |
| cell communication                                                    | 8.89E-14          | 227          | <i>CD34+CD38+ fraction</i><br><i>CEBPA silenced</i><br><i>inv(16)</i><br><i>normal cytogenetics</i>                                                            | <i>CD34+CD38- fraction</i><br><i>CEBPA mutation</i><br><i>poor prognosis</i><br><i>t(8;21)</i>                                                                          |
| negative regulation of developmental process                          | 1.79E-13          | 39           | <i>NPM1 mutation</i>                                                                                                                                           | <i>FLT3 mutation</i><br><i>poor prognosis</i>                                                                                                                           |
| nucleobase, nucleoside, nucleotide and nucleic acid metabolic process | 2.75E-12          | 224          | <i>abnormal cytogenetics</i><br><i>NPM1 mutation</i>                                                                                                           | <i>poor prognosis</i>                                                                                                                                                   |
| regulation of apoptosis                                               | 4.30E-12          | 50           | <i>CD34+CD38+ fraction</i><br><i>CEBPA silenced</i><br><i>MLL fusion gene</i>                                                                                  | <i>CD34+CD38- fraction</i><br><i>CEBPA mutation</i><br><i>t(8;21)</i>                                                                                                   |
| regulation of transcription from RNA polymerase II promoter           | 6.61E-12          | 42           | <i>normal cytogenetics</i><br><i>NPM1 mutation</i>                                                                                                             | <i>CEBPA mutation</i><br><i>MLL fusion gene</i><br><i>t(8;21)</i>                                                                                                       |
| regulation of programmed cell death                                   | 6.93E-12          | 50           | <i>CEBPA silenced</i><br><i>MLL fusion gene</i>                                                                                                                | <i>CEBPA mutation</i><br><i>t(8;21)</i>                                                                                                                                 |

|                                                                                              |          |     |                                                                                          |                                                                                          |
|----------------------------------------------------------------------------------------------|----------|-----|------------------------------------------------------------------------------------------|------------------------------------------------------------------------------------------|
| positive regulation of metabolic process                                                     | 1.94E-11 | 41  | high centrosome aberrations<br><i>inv(16)</i>                                            | low centrosome aberrations<br>poor prognosis                                             |
| regulation of metabolic process                                                              | 3.07E-11 | 177 | high centrosome aberrations<br><i>NPM1</i> mutation                                      | <i>CEBPA</i> mutation<br>low centrosome aberrations<br>poor prognosis<br><i>t(15;17)</i> |
| regulation of cellular metabolic process                                                     | 3.39E-11 | 173 | high centrosome aberrations<br><i>NPM1</i> mutation                                      | <i>CEBPA</i> mutation<br>low centrosome aberrations<br>poor prognosis<br><i>t(15;17)</i> |
| positive regulation of cellular metabolic process                                            | 3.49E-11 | 40  | high centrosome aberrations<br><i>inv(16)</i>                                            | low centrosome aberrations                                                               |
| negative regulation of apoptosis                                                             | 4.74E-11 | 30  | <i>NPM1</i> mutation                                                                     | poor prognosis                                                                           |
| negative regulation of programmed cell death                                                 | 6.73E-11 | 30  | <i>NPM1</i> mutation                                                                     | poor prognosis                                                                           |
| regulation of gene expression                                                                | 1.06E-09 | 162 | <i>NPM1</i> mutation                                                                     | abnormal cytogenetics<br><i>CEBPA</i> mutation<br>poor prognosis<br><i>t(15;17)</i>      |
| protein modification process                                                                 | 1.29E-09 | 126 | <i>CD34+CD38-</i> fraction                                                               | <i>CD34+CD38+</i> fraction                                                               |
| transcription                                                                                | 1.82E-09 | 160 | <i>NPM1</i> mutation                                                                     | abnormal cytogenetics<br><i>CEBPA</i> mutation<br>poor prognosis                         |
| transcription, DNA-dependent                                                                 | 2.48E-09 | 148 | <i>NPM1</i> mutation                                                                     | abnormal cytogenetics<br><i>CEBPA</i> mutation<br>poor prognosis                         |
| RNA biosynthetic process                                                                     | 2.89E-09 | 148 | <i>NPM1</i> mutation                                                                     | abnormal cytogenetics<br><i>CEBPA</i> mutation<br>poor prognosis                         |
| post-translational protein modification                                                      | 3.96E-09 | 109 | <i>CD34+CD38-</i> fraction                                                               | <i>CD34+CD38+</i> fraction                                                               |
| regulation of RNA metabolic process                                                          | 4.58E-09 | 145 |                                                                                          | abnormal cytogenetics<br><i>CEBPA</i> mutation<br>poor prognosis                         |
| regulation of transcription, DNA-dependent                                                   | 6.53E-09 | 144 |                                                                                          | abnormal cytogenetics<br><i>CEBPA</i> mutation<br>poor prognosis                         |
| positive regulation of transcription, DNA-dependent                                          | 6.58E-09 | 27  |                                                                                          | poor prognosis                                                                           |
| positive regulation of RNA metabolic process                                                 | 8.12E-09 | 27  |                                                                                          | poor prognosis                                                                           |
| gene expression                                                                              | 9.88E-09 | 205 | abnormal cytogenetics                                                                    | poor prognosis                                                                           |
| positive regulation of transcription                                                         | 1.20E-08 | 30  | high centrosome aberrations                                                              | low centrosome aberrations<br>poor prognosis                                             |
| anatomical structure morphogenesis                                                           | 1.24E-08 | 57  | <i>FLT3-ITD</i><br><i>FLT3</i> mutation<br><i>MLL</i> fusion gene<br>normal cytogenetics | poor prognosis<br><i>t(15;17)</i><br><i>t(8;21)</i>                                      |
| regulation of nucleobase, nucleoside, nucleotide and nucleic acid metabolic process          | 1.55E-08 | 154 | <i>NPM1</i> mutation                                                                     | abnormal cytogenetics<br><i>CEBPA</i> mutation<br>poor prognosis                         |
| positive regulation of developmental process                                                 | 2.94E-08 | 33  | <i>inv(16)</i><br><i>MLL</i> fusion gene                                                 | poor prognosis<br><i>t(8;21)</i>                                                         |
| regulation of biological quality                                                             | 2.96E-08 | 66  | <i>FAB-M7</i><br><i>MLL</i> fusion gene<br><i>t(8;14)</i>                                | poor prognosis<br><i>t(8;21)</i>                                                         |
| regulation of transcription                                                                  | 3.22E-08 | 151 | <i>NPM1</i> mutation                                                                     | abnormal cytogenetics<br><i>CEBPA</i> mutation<br>poor prognosis                         |
| positive regulation of nucleobase, nucleoside, nucleotide and nucleic acid metabolic process | 3.42E-08 | 30  | high centrosome aberrations<br><i>inv(16)</i>                                            | low centrosome aberrations<br>poor prognosis                                             |

|                                                                                              |          |     |                                                                                                                                                  |                                                                                                           |
|----------------------------------------------------------------------------------------------|----------|-----|--------------------------------------------------------------------------------------------------------------------------------------------------|-----------------------------------------------------------------------------------------------------------|
| organ morphogenesis                                                                          | 2.86E-07 | 32  | <i>inv(16)</i><br><i>normal cytogenetics</i><br><i>NPM1 mutation</i>                                                                             | <i>poor prognosis</i><br><i>t(8;21)</i>                                                                   |
| mRNA metabolic process                                                                       | 5.21E-07 | 31  |                                                                                                                                                  | <i>poor prognosis</i>                                                                                     |
| multi-organism process                                                                       | 1.04E-06 | 29  | <i>CD34+CD38+ fraction</i><br><i>FAB-M4</i><br><i>FAB-M5</i><br><i>NPM1 mutation</i>                                                             | <i>CD34+CD38- fraction</i><br><i>poor prognosis</i>                                                       |
| macromolecule localization                                                                   | 1.27E-06 | 60  | <i>MLL fusion gene</i>                                                                                                                           | <i>poor prognosis</i>                                                                                     |
| mRNA processing                                                                              | 4.26E-06 | 26  |                                                                                                                                                  | <i>poor prognosis</i>                                                                                     |
| hemopoietic or lymphoid organ development                                                    | 6.90E-06 | 20  | <i>inv(16)</i>                                                                                                                                   | <i>NPM1 mutation</i><br><i>poor prognosis</i>                                                             |
| protein localization                                                                         | 8.61E-06 | 56  | <i>MLL fusion gene</i>                                                                                                                           | <i>poor prognosis</i>                                                                                     |
| ubiquitin cycle                                                                              | 8.72E-06 | 38  |                                                                                                                                                  | <i>poor prognosis</i>                                                                                     |
| hemopoiesis                                                                                  | 1.16E-05 | 19  | <i>inv(16)</i>                                                                                                                                   | <i>NPM1 mutation</i><br><i>poor prognosis</i>                                                             |
| regulation of cell proliferation                                                             | 1.40E-05 | 34  | <i>aneuploid</i><br><i>CD34+CD38- fraction</i><br><i>MLL fusion gene</i><br><i>NPM1 mutation</i>                                                 | <i>CD34+CD38+ fraction</i><br><i>euploid</i><br><i>poor prognosis</i><br><i>t(8;21)</i>                   |
| immune system development                                                                    | 1.66E-05 | 20  | <i>inv(16)</i>                                                                                                                                   | <i>poor prognosis</i>                                                                                     |
| negative regulation of transcription                                                         | 1.68E-05 | 26  | <i>poor prognosis</i>                                                                                                                            |                                                                                                           |
| regulation of signal transduction                                                            | 1.73E-05 | 48  |                                                                                                                                                  | <i>poor prognosis</i>                                                                                     |
| response to other organism                                                                   | 2.34E-05 | 21  | <i>CD34+CD38+ fraction</i><br><i>FAB-M4</i><br><i>FAB-M5</i><br><i>NPM1 mutation</i>                                                             | <i>CD34+CD38- fraction</i><br><i>poor prognosis</i>                                                       |
| localization                                                                                 | 2.71E-05 | 169 | <i>FAB-M7</i><br><i>inv(16)</i><br><i>MLL fusion gene</i>                                                                                        | <i>poor prognosis</i><br><i>t(8;21)</i>                                                                   |
| protein transport                                                                            | 2.92E-05 | 51  | <i>MLL fusion gene</i>                                                                                                                           | <i>poor prognosis</i>                                                                                     |
| anti-apoptosis                                                                               | 3.48E-05 | 19  | <i>NPM1 mutation</i>                                                                                                                             | <i>poor prognosis</i>                                                                                     |
| negative regulation of nucleobase, nucleoside, nucleotide and nucleic acid metabolic process | 3.69E-05 | 27  | <i>poor prognosis</i>                                                                                                                            |                                                                                                           |
| response to molecule of bacterial origin                                                     | 4.08E-05 | 6   | <i>NPM1 mutation</i>                                                                                                                             | <i>poor prognosis</i>                                                                                     |
| establishment of protein localization                                                        | 6.24E-05 | 52  | <i>MLL fusion gene</i>                                                                                                                           | <i>poor prognosis</i>                                                                                     |
| cellular localization                                                                        | 6.34E-05 | 60  | <i>MLL fusion gene</i>                                                                                                                           | <i>poor prognosis</i>                                                                                     |
| localization of cell                                                                         | 9.26E-05 | 29  | <i>CD34+CD38+ fraction</i><br><i>inv(16)</i><br><i>MLL fusion gene</i><br><i>NPM1 mutation</i>                                                   | <i>CD34+CD38- fraction</i><br><i>normal cytogenetics</i><br><i>poor prognosis</i><br><i>t(8;21)</i>       |
| cell motility                                                                                | 9.26E-05 | 29  | <i>CD34+CD38+ fraction</i><br><i>inv(16)</i><br><i>MLL fusion gene</i><br><i>NPM1 mutation</i>                                                   | <i>CD34+CD38- fraction</i><br><i>normal cytogenetics</i><br><i>poor prognosis</i><br><i>t(8;21)</i>       |
| positive regulation of cell activation                                                       | 1.40E-04 | 11  | <i>NPM1 mutation</i>                                                                                                                             |                                                                                                           |
| positive regulation of leukocyte activation                                                  | 1.40E-04 | 11  | <i>NPM1 mutation</i>                                                                                                                             |                                                                                                           |
| response to biotic stimulus                                                                  | 1.50E-04 | 24  | <i>CD34+CD38+ fraction</i><br><i>NPM1 mutation</i>                                                                                               | <i>CD34+CD38- fraction</i><br><i>poor prognosis</i>                                                       |
| RNA splicing                                                                                 | 1.60E-04 | 21  |                                                                                                                                                  | <i>poor prognosis</i>                                                                                     |
| regulation of immune effector process                                                        | 1.70E-04 | 8   | <i>normal cytogenetics</i><br><i>NPM1 mutation</i>                                                                                               |                                                                                                           |
| response to hypoxia                                                                          | 1.80E-04 | 10  |                                                                                                                                                  | <i>poor prognosis</i>                                                                                     |
| response to external stimulus                                                                | 1.90E-04 | 39  | <i>CD34+CD38+ fraction</i><br><i>inv(16)</i><br><i>MLL fusion gene</i><br><i>monocytic</i><br><i>normal cytogenetics</i><br><i>NPM1 mutation</i> | <i>CD34+CD38- fraction</i><br><i>control</i><br><i>del(7q)</i><br><i>poor prognosis</i><br><i>t(8;21)</i> |

|                                                                      |          |    |                                                                                                                                          |                                                                              |
|----------------------------------------------------------------------|----------|----|------------------------------------------------------------------------------------------------------------------------------------------|------------------------------------------------------------------------------|
| positive regulation of transcription from RNA polymerase II promoter | 2.10E-04 | 16 |                                                                                                                                          | <i>poor prognosis</i>                                                        |
| positive regulation of apoptosis                                     | 3.10E-04 | 22 | <i>NPM1 mutation</i>                                                                                                                     |                                                                              |
| regulation of mast cell cytokine production                          | 3.80E-04 | 4  | <i>inv(16)</i><br><i>normal cytogenetics</i>                                                                                             | <i>t(8;21)</i>                                                               |
| positive regulation of programmed cell death                         | 3.80E-04 | 22 | <i>NPM1 mutation</i>                                                                                                                     |                                                                              |
| mast cell cytokine production                                        | 3.80E-04 | 4  | <i>inv(16)</i><br><i>normal cytogenetics</i>                                                                                             | <i>t(8;21)</i>                                                               |
| enzyme linked receptor protein signaling pathway                     | 4.10E-04 | 24 |                                                                                                                                          | <i>poor prognosis</i>                                                        |
| protein targeting                                                    | 4.20E-04 | 20 |                                                                                                                                          | <i>poor prognosis</i>                                                        |
| positive regulation of signal transduction                           | 4.20E-04 | 17 | <i>MLL fusion gene</i><br><i>NPM1 mutation</i>                                                                                           | <i>poor prognosis</i>                                                        |
| regulation of molecular function                                     | 5.20E-04 | 40 | <i>aneuploid</i><br><i>high centrosome aberrations</i>                                                                                   | <i>euploid</i><br><i>low centrosome aberrations</i><br><i>NPM1 mutation</i>  |
| induction of apoptosis                                               | 7.10E-04 | 19 | <i>NPM1 mutation</i>                                                                                                                     |                                                                              |
| positive regulation of lymphocyte activation                         | 7.10E-04 | 10 | <i>NPM1 mutation</i>                                                                                                                     |                                                                              |
| establishment of cellular localization                               | 7.50E-04 | 56 | <i>MLL fusion gene</i>                                                                                                                   | <i>poor prognosis</i>                                                        |
| induction of programmed cell death                                   | 7.60E-04 | 19 | <i>NPM1 mutation</i>                                                                                                                     |                                                                              |
| cytokine production                                                  | 8.30E-04 | 14 | <i>CD34+CD38+ fraction</i><br><i>FAB-M4</i><br><i>FAB-M5</i><br><i>inv(16)</i><br><i>NPM1 mutation</i>                                   | <i>CD34+CD38- fraction</i><br><i>t(8;21)</i>                                 |
| mRNA transport                                                       | 9.50E-04 | 12 |                                                                                                                                          | <i>poor prognosis</i>                                                        |
| regulation of production of molecular mediator of immune response    | 1.04E-03 | 5  | <i>normal cytogenetics</i><br><i>NPM1 mutation</i>                                                                                       |                                                                              |
| regulation of cytokine production during immune response             | 1.04E-03 | 5  | <i>normal cytogenetics</i><br><i>NPM1 mutation</i>                                                                                       |                                                                              |
| homeostasis of number of cells                                       | 1.13E-03 | 9  |                                                                                                                                          |                                                                              |
| positive regulation of T cell activation                             | 1.13E-03 | 9  | <i>NPM1 mutation</i>                                                                                                                     |                                                                              |
| cell activation                                                      | 1.18E-03 | 19 | <i>inv(16)</i><br><i>NPM1 mutation</i>                                                                                                   | <i>t(8;21)</i>                                                               |
| nuclear transport                                                    | 1.26E-03 | 16 |                                                                                                                                          | <i>poor prognosis</i>                                                        |
| regulation of cell activation                                        | 1.57E-03 | 12 | <i>inv(16)</i><br><i>NPM1 mutation</i>                                                                                                   | <i>t(8;21)</i>                                                               |
| regulation of leukocyte activation                                   | 1.57E-03 | 12 | <i>inv(16)</i><br><i>NPM1 mutation</i>                                                                                                   | <i>t(8;21)</i>                                                               |
| defense response                                                     | 1.58E-03 | 35 | <i>11q23</i><br><i>CD34+CD38+ fraction</i><br><i>inv(16)</i><br><i>MLL fusion gene</i><br><i>monocytic</i><br><i>normal cytogenetics</i> | <i>CD34+CD38- fraction</i><br><i>poor prognosis</i><br><i>t(8;21)</i>        |
| response to endogenous stimulus                                      | 1.87E-03 | 33 | <i>abnormal cytogenetics</i><br><i>aneuploid</i><br><i>high centrosome aberrations</i>                                                   | <i>euploid</i><br><i>low centrosome aberrations</i><br><i>poor prognosis</i> |
| peptidyl-amino acid modification                                     | 2.07E-03 | 14 |                                                                                                                                          |                                                                              |
| blood vessel development                                             | 2.46E-03 | 16 | <i>inv(16)</i><br><i>NPM1 mutation</i>                                                                                                   | <i>MLL fusion gene</i><br><i>t(8;21)</i>                                     |
| regulation of immune system process                                  | 2.46E-03 | 16 | <i>inv(16)</i><br><i>NPM1 mutation</i>                                                                                                   | <i>t(8;21)</i>                                                               |
| positive regulation of immune system process                         | 3.02E-03 | 14 | <i>inv(16)</i><br><i>NPM1 mutation</i>                                                                                                   | <i>t(8;21)</i>                                                               |
| regulation of T cell activation                                      | 3.06E-03 | 10 | <i>NPM1 mutation</i>                                                                                                                     |                                                                              |
| vasculature development                                              | 3.12E-03 | 16 | <i>inv(16)</i><br><i>NPM1 mutation</i>                                                                                                   | <i>MLL fusion gene</i><br><i>t(8;21)</i>                                     |
| nucleic acid transport                                               | 3.18E-03 | 12 |                                                                                                                                          |                                                                              |
| RNA transport                                                        | 3.18E-03 | 12 |                                                                                                                                          |                                                                              |

|                                                                    |          |    |                                                                                                                    |                                                                             |
|--------------------------------------------------------------------|----------|----|--------------------------------------------------------------------------------------------------------------------|-----------------------------------------------------------------------------|
| establishment of RNA localization                                  | 3.18E-03 | 12 |                                                                                                                    |                                                                             |
| response to wounding                                               | 3.42E-03 | 28 | <i>CD34+CD38+ fraction<br/>inv(16)<br/>MLL fusion gene<br/>monocytic<br/>normal cytogenetics<br/>NPM1 mutation</i> | <i>CD34+CD38- fraction<br/>control<br/>poor prognosis<br/>t(8;21)</i>       |
| protein import into nucleus                                        | 3.55E-03 | 12 |                                                                                                                    |                                                                             |
| RNA localization                                                   | 3.55E-03 | 12 |                                                                                                                    |                                                                             |
| T cell activation                                                  | 3.55E-03 | 12 | <i>inv(16)</i>                                                                                                     |                                                                             |
| response to chemical stimulus                                      | 3.92E-03 | 34 | <i>CD34+CD38+ fraction<br/>inv(16)<br/>normal cytogenetics<br/>NPM1 mutation</i>                                   | <i>11q23<br/>CD34+CD38- fraction<br/>poor prognosis<br/>t(8;21)</i>         |
| regulation of multicellular organismal process                     | 4.18E-03 | 23 | <i>FAB-M7<br/>inv(16)<br/>NPM1 mutation</i>                                                                        | <i>t(8;21)</i>                                                              |
| regulation of response to stimulus                                 | 4.42E-03 | 15 | <i>NPM1 mutation</i>                                                                                               | <i>t(8;21)</i>                                                              |
| nuclear import                                                     | 4.43E-03 | 12 |                                                                                                                    |                                                                             |
| leukocyte mediated immunity                                        | 4.56E-03 | 11 | <i>inv(16)<br/>normal cytogenetics<br/>NPM1 mutation</i>                                                           | <i>t(8;21)</i>                                                              |
| immune response-regulating cell surface receptor signaling pathway | 4.92E-03 | 7  |                                                                                                                    |                                                                             |
| intracellular transport                                            | 5.14E-03 | 47 |                                                                                                                    | <i>poor prognosis</i>                                                       |
| negative regulation of cell cycle                                  | 5.19E-03 | 14 |                                                                                                                    |                                                                             |
| nucleocytoplasmic transport                                        | 5.20E-03 | 15 |                                                                                                                    |                                                                             |
| nervous system development                                         | 5.45E-03 | 38 | <i>CD34+CD38- fraction</i>                                                                                         | <i>CD34+CD38+ fraction<br/>inv(16)<br/>NPM1 mutation<br/>poor prognosis</i> |
| I-kappaB kinase/NF-kappaB cascade                                  | 5.66E-03 | 14 | <i>MLL fusion gene<br/>NPM1 mutation</i>                                                                           | <i>poor prognosis</i>                                                       |
| regulation of catalytic activity                                   | 5.96E-03 | 35 | <i>aneuploid<br/>high centrosome aberrations</i>                                                                   | <i>euploid<br/>low centrosome aberrations<br/>NPM1 mutation</i>             |
| regulation of cell differentiation                                 | 6.60E-03 | 15 | <i>NPM1 mutation</i>                                                                                               |                                                                             |
| response to abiotic stimulus                                       | 6.64E-03 | 16 |                                                                                                                    |                                                                             |
| regulation of cytokine production                                  | 6.75E-03 | 8  | <i>normal cytogenetics<br/>NPM1 mutation</i>                                                                       |                                                                             |
| RNA processing                                                     | 7.00E-03 | 31 |                                                                                                                    |                                                                             |
| immune response-regulating signal transduction                     | 7.95E-03 | 7  |                                                                                                                    | <i>poor prognosis</i>                                                       |

#### Molecular Functions

|                                    |          |     |                                                                              |                                                                                              |
|------------------------------------|----------|-----|------------------------------------------------------------------------------|----------------------------------------------------------------------------------------------|
| binding                            | 1.20E-14 | 619 | <i>aneuploid<br/>CD34+CD38+ fraction<br/>inv(16)<br/>normal cytogenetics</i> | <i>CD34+CD38- fraction<br/>euploid<br/>t(8;21)</i>                                           |
| transcription factor binding       | 1.65E-14 | 45  | <i>NPM1 mutation</i>                                                         | <i>poor prognosis</i>                                                                        |
| transcription activator activity   | 2.40E-12 | 36  | <i>inv(16)<br/>NPM1 mutation</i>                                             | <i>poor prognosis<br/>t(8;21)</i>                                                            |
| transcription cofactor activity    | 3.09E-11 | 34  |                                                                              | <i>poor prognosis</i>                                                                        |
| RNA binding                        | 1.42E-09 | 62  |                                                                              | <i>poor prognosis</i>                                                                        |
| transcription coactivator activity | 1.44E-09 | 25  | <i>inv(16)</i>                                                               | <i>poor prognosis<br/>t(8;21)</i>                                                            |
| transcription regulator activity   | 6.81E-09 | 103 | <i>NPM1 mutation</i>                                                         | <i>abnormal cytogenetics<br/>control<br/>MLL fusion gene<br/>poor prognosis<br/>t(15;17)</i> |
| DNA binding                        | 5.13E-07 | 141 | <i>NPM1 mutation</i>                                                         | <i>abnormal cytogenetics<br/>poor prognosis</i>                                              |
| transcription repressor activity   | 3.28E-06 | 22  |                                                                              | <i>poor prognosis</i>                                                                        |
| enzyme binding                     | 2.86E-05 | 25  |                                                                              | <i>poor prognosis</i>                                                                        |

|                                                 |          |     |                            |                                                                                             |
|-------------------------------------------------|----------|-----|----------------------------|---------------------------------------------------------------------------------------------|
| receptor signaling protein activity             | 9.93E-05 | 18  | <i>MLL fusion gene</i>     | <i>poor prognosis</i>                                                                       |
| nucleic acid binding                            | 1.90E-03 | 203 |                            | <i>abnormal cytogenetics</i>                                                                |
| RNA polymerase II transcription factor activity | 2.58E-03 | 21  |                            |                                                                                             |
| protein serine/threonine kinase activity        | 2.63E-03 | 37  | <i>aneuploid</i>           | <i>euploid</i><br><i>poor prognosis</i>                                                     |
| nuclear hormone receptor binding                | 2.86E-03 | 9   |                            |                                                                                             |
| hormone receptor binding                        | 3.31E-03 | 9   |                            |                                                                                             |
| molecular adaptor activity                      | 4.41E-03 | 9   |                            | <i>poor prognosis</i>                                                                       |
| protein dimerization activity                   | 5.74E-03 | 24  | <i>CD34+CD38+ fraction</i> | <i>CD34+CD38- fraction</i>                                                                  |
| metal ion binding                               | 6.20E-03 | 212 |                            |                                                                                             |
| transcription factor activity                   | 7.24E-03 | 63  | <i>NPM1 mutation</i>       | <i>abnormal cytogenetics</i><br><i>control</i><br><i>MLL fusion gene</i><br><i>t(15;17)</i> |

### Cellular Components

|                              |          |    |                                                                                                                                                       |                                                                                                |
|------------------------------|----------|----|-------------------------------------------------------------------------------------------------------------------------------------------------------|------------------------------------------------------------------------------------------------|
| nucleoplasm part             | 7.90E-13 | 45 |                                                                                                                                                       |                                                                                                |
| nuclear body                 | 5.45E-10 | 20 |                                                                                                                                                       | <i>poor prognosis</i>                                                                          |
| nuclear speck                | 2.21E-08 | 16 |                                                                                                                                                       | <i>poor prognosis</i>                                                                          |
| Golgi apparatus              | 9.93E-06 | 43 | <i>inv(16)</i><br><i>MLL fusion gene</i>                                                                                                              | <i>poor prognosis</i><br><i>t(8;21)</i>                                                        |
| endomembrane system          | 3.52E-05 | 54 | <i>CEBPA silenced</i><br><i>inv(16)</i><br><i>MLL fusion gene</i><br><i>NPM1 mutation</i>                                                             | <i>CEBPA mutation</i><br><i>poor prognosis</i><br><i>t(8;21)</i>                               |
| lysosome                     | 8.17E-05 | 19 | <i>CD34+CD38+ fraction</i><br><i>CEBPA mutation</i><br><i>FAB-M4</i><br><i>FAB-M5</i><br><i>inv(16)</i><br><i>MLL fusion gene</i><br><i>monocytic</i> | <i>CD34+CD38- fraction</i><br><i>CEBPA silenced</i><br><i>poor prognosis</i><br><i>t(8;21)</i> |
| lytic vacuole                | 1.00E-04 | 19 | <i>CD34+CD38+ fraction</i><br><i>CEBPA mutation</i><br><i>FAB-M4</i><br><i>FAB-M5</i><br><i>inv(16)</i><br><i>MLL fusion gene</i><br><i>monocytic</i> | <i>CD34+CD38- fraction</i><br><i>CEBPA silenced</i><br><i>poor prognosis</i><br><i>t(8;21)</i> |
| vacuole                      | 1.80E-04 | 20 | <i>CD34+CD38+ fraction</i><br><i>CEBPA mutation</i><br><i>FAB-M4</i><br><i>FAB-M5</i><br><i>inv(16)</i><br><i>MLL fusion gene</i><br><i>monocytic</i> | <i>CD34+CD38- fraction</i><br><i>CEBPA silenced</i><br><i>poor prognosis</i><br><i>t(8;21)</i> |
| cellular_component           | 1.13E-03 | 40 |                                                                                                                                                       | <i>poor prognosis</i>                                                                          |
| intrinsic to plasma membrane | 1.19E-03 | 59 | <i>CBF</i><br><i>CD34+CD38+ fraction</i><br><i>FAB-M4</i><br><i>FAB-M5</i><br><i>FAB-M7</i><br><i>inv(16)</i><br><i>monocytic</i>                     | <i>CD34+CD38- fraction</i><br><i>t(15;17)</i>                                                  |
| integral to plasma membrane  | 1.67E-03 | 58 | <i>CBF</i><br><i>CD34+CD38+ fraction</i><br><i>FAB-M4</i><br><i>FAB-M5</i><br><i>FAB-M7</i><br><i>inv(16)</i><br><i>monocytic</i>                     | <i>CD34+CD38- fraction</i>                                                                     |
| endosome                     | 6.26E-03 | 16 | <i>MLL fusion gene</i>                                                                                                                                | <i>poor prognosis</i>                                                                          |

|                 |          |     |                                                                                                                        |                                                   |
|-----------------|----------|-----|------------------------------------------------------------------------------------------------------------------------|---------------------------------------------------|
| plasma membrane | 6.87E-03 | 129 | 11q23<br>CBF<br>CD34+CD38+ fraction<br>CEBPA silenced<br>control<br>FAB-M4<br>FAB-M5<br>FAB-M7<br>inv(16)<br>monocytic | CD34+CD38- fraction<br>CEBPA mutation<br>t(15;17) |
|-----------------|----------|-----|------------------------------------------------------------------------------------------------------------------------|---------------------------------------------------|

Significantly over-represented functional gene ontology (GO) categories of up-regulated genes associated with good prognosis are presented here. GO categories that are also over-represented in down-regulated genes associated with good prognosis are not included. Corrected p-value is the Bonferroni multiple hypothesis. Identification tags that are both up-regulated and down-regulated are not included in the 'other tags' columns. Identification tag descriptions can be found in Table S1.
