# Supplementary material for: Integrative Meta-Analysis of Differential Gene Expression in Acute Myeloid Leukemia
Source: PubMed Central journal article supplement (PMC2830886; doi:10.1371/journal.pone.0009466), 2010-03-01
Supplement: pone.0009466.s008.pdf [file pone.0009466.s008.pdf]

**Table S8. Functional categories of down-regulated genes associated with good prognosis**

| GO category                       | Corrected p-value | No. of genes | Other tags with downregulated genes                                                                                          | Other tags with upregulated genes                                                                                                             |
|-----------------------------------|-------------------|--------------|------------------------------------------------------------------------------------------------------------------------------|-----------------------------------------------------------------------------------------------------------------------------------------------|
| <b>Biological Processes</b>       |                   |              |                                                                                                                              |                                                                                                                                               |
| cell cycle process                | 2.20E-11          | 31           | <i>CD34+CD38- fraction</i><br><i>euploid</i><br><i>FLT3-ITD</i><br><i>low centrosome aberrations</i><br><i>NPM1 mutation</i> | <i>aneuploid</i><br><i>CD34+CD38+ fraction</i><br><i>high centrosome aberrations</i><br><i>poor prognosis</i>                                 |
| mitotic cell cycle                | 3.64E-09          | 24           | <i>CD34+CD38- fraction</i><br><i>euploid</i><br><i>FLT3-ITD</i><br><i>low centrosome aberrations</i><br><i>NPM1 mutation</i> | <i>aneuploid</i><br><i>CD34+CD38+ fraction</i><br><i>high centrosome aberrations</i><br><i>poor prognosis</i>                                 |
| cell cycle phase                  | 4.75E-09          | 25           | <i>CD34+CD38- fraction</i><br><i>euploid</i><br><i>FLT3-ITD</i><br><i>low centrosome aberrations</i><br><i>NPM1 mutation</i> | <i>aneuploid</i><br><i>CD34+CD38+ fraction</i><br><i>high centrosome aberrations</i><br><i>poor prognosis</i>                                 |
| cell division                     | 2.77E-08          | 20           | <i>CD34+CD38- fraction</i><br><i>euploid</i><br><i>low centrosome aberrations</i><br><i>NPM1 mutation</i>                    | <i>aneuploid</i><br><i>CD34+CD38+ fraction</i><br><i>high centrosome aberrations</i><br><i>poor prognosis</i>                                 |
| regulation of cell cycle          | 4.93E-08          | 21           | <i>CD34+CD38- fraction</i><br><i>euploid</i><br><i>low centrosome aberrations</i>                                            | <i>abnormal cytogenetics</i><br><i>aneuploid</i><br><i>CD34+CD38+ fraction</i><br><i>high centrosome aberrations</i><br><i>poor prognosis</i> |
| mitosis                           | 5.63E-08          | 19           | <i>CD34+CD38- fraction</i><br><i>euploid</i><br><i>FLT3-ITD</i><br><i>NPM1 mutation</i>                                      | <i>aneuploid</i><br><i>CD34+CD38+ fraction</i><br><i>poor prognosis</i>                                                                       |
| M phase of mitotic cell cycle     | 8.78E-08          | 19           | <i>CD34+CD38- fraction</i><br><i>euploid</i><br><i>FLT3-ITD</i><br><i>NPM1 mutation</i>                                      | <i>aneuploid</i><br><i>CD34+CD38+ fraction</i><br><i>poor prognosis</i>                                                                       |
| M phase                           | 9.13E-07          | 20           | <i>CD34+CD38- fraction</i><br><i>euploid</i><br><i>NPM1 mutation</i>                                                         | <i>aneuploid</i><br><i>CD34+CD38+ fraction</i><br><i>poor prognosis</i>                                                                       |
| DNA metabolic process             | 3.28E-05          | 32           | <i>euploid</i><br><i>low centrosome aberrations</i>                                                                          | <i>abnormal cytogenetics</i><br><i>aneuploid</i><br><i>high centrosome aberrations</i><br><i>poor prognosis</i>                               |
| interphase of mitotic cell cycle  | 7.51E-05          | 10           | <i>CD34+CD38- fraction</i><br><i>euploid</i><br><i>low centrosome aberrations</i><br><i>NPM1 mutation</i>                    | <i>aneuploid</i><br><i>CD34+CD38+ fraction</i><br><i>high centrosome aberrations</i><br><i>poor prognosis</i>                                 |
| interphase                        | 1.40E-04          | 10           | <i>CD34+CD38- fraction</i><br><i>euploid</i><br><i>low centrosome aberrations</i><br><i>NPM1 mutation</i>                    | <i>aneuploid</i><br><i>CD34+CD38+ fraction</i><br><i>high centrosome aberrations</i><br><i>poor prognosis</i>                                 |
| organic acid metabolic process    | 2.90E-04          | 28           |                                                                                                                              | <i>poor prognosis</i>                                                                                                                         |
| carboxylic acid metabolic process | 8.70E-04          | 27           |                                                                                                                              | <i>poor prognosis</i>                                                                                                                         |
| G1 phase of mitotic cell cycle    | 1.04E-03          | 5            | <i>CD34+CD38- fraction</i>                                                                                                   | <i>CD34+CD38+ fraction</i><br><i>poor prognosis</i>                                                                                           |
| G1 phase                          | 2.54E-03          | 5            | <i>CD34+CD38- fraction</i>                                                                                                   | <i>CD34+CD38+ fraction</i><br><i>poor prognosis</i>                                                                                           |
| cellular component assembly       | 4.19E-03          | 27           |                                                                                                                              |                                                                                                                                               |
| <b>Molecular Functions</b>        |                   |              |                                                                                                                              |                                                                                                                                               |
| nucleotide binding                | 6.42E-03          | 84           | <i>euploid</i>                                                                                                               | <i>aneuploid</i>                                                                                                                              |
| <b>Cellular Components</b>        |                   |              |                                                                                                                              |                                                                                                                                               |
| microtubule cytoskeleton          | 2.41E-06          | 25           | <i>CD34+CD38- fraction</i><br><i>euploid</i>                                                                                 | <i>aneuploid</i><br><i>CD34+CD38+ fraction</i><br><i>poor prognosis</i>                                                                       |

|                               |          |    |                                                                      |                                                                                                                                     |
|-------------------------------|----------|----|----------------------------------------------------------------------|-------------------------------------------------------------------------------------------------------------------------------------|
| mitochondrion                 | 4.30E-06 | 36 |                                                                      | <i>MLL fusion gene</i><br><i>poor prognosis</i>                                                                                     |
| spindle                       | 1.10E-05 | 10 | <i>CD34+CD38- fraction</i><br><i>euploid</i><br><i>NPM1 mutation</i> | <i>aneuploid</i><br><i>CD34+CD38+ fraction</i><br><i>poor prognosis</i>                                                             |
| protein complex               | 2.29E-05 | 70 | <i>euploid</i><br><i>low centrosome aberrations</i>                  | <i>aneuploid</i><br><i>high centrosome aberrations</i><br><i>poor prognosis</i>                                                     |
| plasma membrane part          | 1.16E-03 | 53 | <i>CEBPA mutation</i><br><i>t(15;17)</i>                             | <i>11q23</i><br><i>CEBPA silenced</i><br><i>FAB-M4</i><br><i>FAB-M5</i><br><i>FAB-M7</i><br><i>inv(16)</i><br><i>poor prognosis</i> |
| microtubule organizing center | 3.45E-03 | 10 | <i>CD34+CD38- fraction</i><br><i>euploid</i>                         | <i>aneuploid</i><br><i>CD34+CD38+ fraction</i><br><i>poor prognosis</i>                                                             |
| macromolecular complex        | 3.51E-03 | 78 | <i>euploid</i><br><i>low centrosome aberrations</i>                  | <i>abnormal cytogenetics</i><br><i>aneuploid</i><br><i>high centrosome aberrations</i>                                              |
| cytoskeleton                  | 3.77E-03 | 38 | <i>euploid</i><br><i>NPM1 mutation</i>                               | <i>aneuploid</i>                                                                                                                    |

Significantly over-represented functional gene ontology (GO) categories of down-regulated genes associated with good prognosis are presented here. GO categories that are also over-represented in up-regulated genes associated with good prognosis are not included. Corrected p-value is the Bonferroni multiple hypothesis. Identification tags that are both up-regulated and down-regulated are not included in the 'other tags' columns. Identification tag descriptions can be found in Table S1.
