# Supplementary material for: Integrative Meta-Analysis of Differential Gene Expression in Acute Myeloid Leukemia
Source: PubMed Central journal article supplement (PMC2830886; doi:10.1371/journal.pone.0009466), 2010-03-01
Supplement: pone.0009466.s009.pdf [file pone.0009466.s009.pdf]

**Table S9. Top ranked genes associated with *NPM1* mutations**

| Rank                        | Gene symbol        | no. of specific references | Total no. of references | Total no. of platforms | Total no. of differentially expressed features | Gene name                                                                                              |
|-----------------------------|--------------------|----------------------------|-------------------------|------------------------|------------------------------------------------|--------------------------------------------------------------------------------------------------------|
| <b>Up-regulated genes</b>   |                    |                            |                         |                        |                                                |                                                                                                        |
| 1                           | SMC4               | 5                          | 5                       | 2                      | 15                                             | structural maintenance of chromosomes 4                                                                |
| 2                           | PBX3               | 4                          | 12                      | 5                      | 31                                             | pre-B-cell leukemia homeobox 3                                                                         |
| 3                           | MEIS1              | 4                          | 9                       | 3                      | 16                                             | Meis homeobox 1                                                                                        |
| 4                           | CAT                | 4                          | 6                       | 3                      | 11                                             | catalase                                                                                               |
| 5                           | COL4A5             | 4                          | 6                       | 3                      | 10                                             | collagen, type IV, alpha 5 (Alport syndrome)                                                           |
| 6                           | FOXC1              | 4                          | 6                       | 3                      | 7                                              | forkhead box C1                                                                                        |
| 7                           | LTBP1              | 4                          | 4                       | 2                      | 9                                              | latent transforming growth factor beta binding protein 1                                               |
| 8                           | FTO                | 4                          | 4                       | 2                      | 5                                              | fat mass and obesity associated                                                                        |
| 9                           | HOXB2              | 3                          | 12                      | 6                      | 32                                             | homeobox B2                                                                                            |
| 10                          | HOXA9              | 3                          | 11                      | 4                      | 35                                             | homeobox A9                                                                                            |
| 11                          | HOXB5              | 3                          | 9                       | 5                      | 32                                             | homeobox B5                                                                                            |
| 12                          | HOXA10             | 3                          | 9                       | 4                      | 34                                             | homeobox A10                                                                                           |
| 13                          | HOXA4              | 3                          | 8                       | 4                      | 18                                             | homeobox A4                                                                                            |
| 14                          | SCHIP1             | 3                          | 7                       | 3                      | 8                                              | schwannomin interacting protein 1                                                                      |
| 15                          | HOXA5              | 3                          | 6                       | 1                      | 15                                             | homeobox A5                                                                                            |
| 16                          | SNX10              | 3                          | 5                       | 2                      | 8                                              | sorting nexin 10                                                                                       |
| 17                          | HOXB6              | 3                          | 5                       | 2                      | 7                                              | homeobox B6                                                                                            |
| 18                          | HOXA7              | 3                          | 5                       | 1                      | 12                                             | homeobox A7                                                                                            |
| 19                          | RASGRP3            | 3                          | 4                       | 2                      | 8                                              | RAS guanyl releasing protein 3 (calcium and DAG-regulated)                                             |
| 20                          | IRX5               | 3                          | 4                       | 2                      | 5                                              | iroquois homeobox 5                                                                                    |
| <b>Down-regulated genes</b> |                    |                            |                         |                        |                                                |                                                                                                        |
| 1                           | HLA-DPA1           | 4                          | 10                      | 3                      | 20                                             | major histocompatibility complex, class II, DP alpha 1                                                 |
| 2                           | CD34               | 4                          | 9                       | 3                      | 16                                             | CD34 molecule                                                                                          |
| 3                           | SPARC              | 3                          | 9                       | 5                      | 16                                             | secreted protein, acidic, cysteine-rich (osteonectin)                                                  |
| 4                           | HLA-DRA            | 3                          | 6                       | 3                      | 12                                             | major histocompatibility complex, class II, DR alpha                                                   |
| 5                           | IFITM1             | 3                          | 6                       | 3                      | 9                                              | interferon induced transmembrane protein 1 (9-27)                                                      |
| 6                           | SERPINF1           | 3                          | 6                       | 3                      | 8                                              | serpin peptidase inhibitor, clade F (alpha-2 antiplasmin, pigment epithelium derived factor), member 1 |
| 7                           | APP                | 3                          | 6                       | 2                      | 9                                              | amyloid beta (A4) precursor protein (peptidase nexin-II, Alzheimer disease)                            |
| 8                           | MOX2*<br>(CD200)   | 3                          | 5                       | 3                      | 9                                              | CD200 molecule                                                                                         |
| 9                           | CD7                | 3                          | 5                       | 2                      | 16                                             | CD7 molecule                                                                                           |
| 10                          | PMAIP1             | 3                          | 5                       | 2                      | 8                                              | phorbol-12-myristate-13-acetate-induced protein 1                                                      |
| 11                          | MHC2TA*<br>(CIITA) | 3                          | 5                       | 2                      | 6                                              | class II, major histocompatibility complex, transactivator                                             |
| 12                          | EGFL7              | 3                          | 5                       | 1                      | 6                                              | EGF-like-domain, multiple 7                                                                            |
| 13                          | P2RY5              | 3                          | 4                       | 2                      | 7                                              | purinergic receptor P2Y, G-protein coupled, 5                                                          |
| 14                          | EVL                | 3                          | 4                       | 2                      | 6                                              | Enah/Vasp-like                                                                                         |
| 15                          | VEGFA              | 3                          | 3                       | 1                      | 3                                              | vascular endothelial growth factor A                                                                   |
| 16                          | POU4F1             | 2                          | 11                      | 3                      | 29                                             | POU class 4 homeobox 1                                                                                 |
| 17                          | TSPAN7             | 2                          | 10                      | 5                      | 16                                             | tetraspanin 7                                                                                          |
| 18                          | RUNX1T1            | 2                          | 10                      | 3                      | 34                                             | runt-related transcription factor 1; translocated to, 1 (cyclin D-related)                             |
| 19                          | TRH                | 2                          | 10                      | 3                      | 21                                             | thyrotropin-releasing hormone                                                                          |
| 20                          | MN1                | 2                          | 8                       | 4                      | 16                                             | meningioma (disrupted in balanced translocation) 1                                                     |

In order of preference, the genes are ranked by the number of *NPM1* mutations related independent studies, the total number of independent studies, the total number of unique platforms, and the total number of features.

\*Gene symbol is not approved by HUGO Gene Nomenclature Committee. If a HUGO approved name does exist, it is placed in parenthesis.
