# Supplementary material for: Integrative Meta-Analysis of Differential Gene Expression in Acute Myeloid Leukemia
Source: PubMed Central journal article supplement (PMC2830886; doi:10.1371/journal.pone.0009466), 2010-03-01
Supplement: pone.0009466.s010.pdf [file pone.0009466.s010.pdf]

**Table S10. Top ranked genes associated with t(15;17)**

| Rank                        | Gene symbol | no. of specific references | Total no. of references | Total no. of platforms | Total no. of differentially expressed features | Gene name                                                                                   |
|-----------------------------|-------------|----------------------------|-------------------------|------------------------|------------------------------------------------|---------------------------------------------------------------------------------------------|
| <b>Up-regulated genes</b>   |             |                            |                         |                        |                                                |                                                                                             |
| 1                           | CST7        | 4                          | 7                       | 5                      | 8                                              | cystatin F (leukocystatin)                                                                  |
| 2                           | HGF         | 4                          | 7                       | 2                      | 36                                             | hepatocyte growth factor (hepapoietin A; scatter factor)                                    |
| 3                           | CALR        | 4                          | 5                       | 4                      | 11                                             | calreticulin                                                                                |
| 4                           | PRODH       | 4                          | 5                       | 3                      | 8                                              | proline dehydrogenase (oxidase) 1                                                           |
| 5                           | ANXA8       | 4                          | 5                       | 2                      | 9                                              | annexin A8                                                                                  |
| 6                           | FGF13       | 4                          | 5                       | 2                      | 8                                              | fibroblast growth factor 13                                                                 |
| 7                           | CTSW        | 3                          | 6                       | 3                      | 15                                             | cathepsin W                                                                                 |
| 8                           | PTGDS       | 3                          | 4                       | 2                      | 13                                             | prostaglandin D2 synthase 21kDa (brain)                                                     |
| 9                           | S100B       | 3                          | 4                       | 2                      | 7                                              | S100 calcium binding protein B                                                              |
| 10                          | MST1        | 3                          | 4                       | 2                      | 6                                              | macrophage stimulating 1 (hepatocyte growth factor-like)                                    |
| 11                          | P4HB        | 3                          | 4                       | 2                      | 6                                              | procollagen-proline, 2-oxoglutarate 4-dioxygenase (proline 4-hydroxylase), beta polypeptide |
| 12                          | FP504       | 3                          | 4                       | 1                      | 7                                              | maternally expressed 3                                                                      |
| 13                          | AGRN        | 2                          | 5                       | 4                      | 12                                             | agrin                                                                                       |
| 14                          | SERPING1    | 2                          | 4                       | 3                      | 10                                             | serpin peptidase inhibitor, clade G (C1 inhibitor), member 1, (angioedema, hereditary)      |
| 15                          | CPA3        | 2                          | 4                       | 3                      | 5                                              | carboxypeptidase A3 (mast cell)                                                             |
| 16                          | GABRE       | 2                          | 4                       | 3                      | 4                                              | gamma-aminobutyric acid (GABA) A receptor, epsilon                                          |
| 17                          | KRT18       | 2                          | 4                       | 2                      | 11                                             | keratin 18                                                                                  |
| 18                          | IGFBP2      | 2                          | 4                       | 2                      | 6                                              | insulin-like growth factor binding protein 2, 36kDa                                         |
| 19                          | PCBP3       | 2                          | 3                       | 3                      | 4                                              | poly(rC) binding protein 3                                                                  |
| 20                          | FAM45B      | 2                          | 3                       | 2                      | 8                                              | family with sequence similarity 45, member B                                                |
| <b>Down-regulated genes</b> |             |                            |                         |                        |                                                |                                                                                             |
| 1                           | ARHGAP4     | 7                          | 7                       | 3                      | 23                                             | Rho GTPase activating protein 4                                                             |
| 2                           | CLEC2B      | 4                          | 4                       | 3                      | 14                                             | C-type lectin domain family 2, member B                                                     |
| 3                           | HOXA9       | 3                          | 11                      | 4                      | 35                                             | homeobox A9                                                                                 |
| 4                           | HLA-DPA1    | 3                          | 10                      | 3                      | 20                                             | major histocompatibility complex, class II, DP alpha 1                                      |
| 5                           | NRIP1       | 3                          | 4                       | 2                      | 12                                             | nuclear receptor interacting protein 1                                                      |
| 6                           | PRDX4       | 3                          | 3                       | 3                      | 11                                             | peroxiredoxin 4                                                                             |
| 7                           | RGS10       | 2                          | 8                       | 3                      | 17                                             | regulator of G-protein signaling 10                                                         |
| 8                           | ITGB2       | 2                          | 6                       | 4                      | 17                                             | integrin, beta 2 (complement component 3 receptor 3 and 4 subunit)                          |
| 9                           | CD52        | 2                          | 6                       | 3                      | 14                                             | CD52 molecule                                                                               |
| 10                          | SKAP2       | 2                          | 5                       | 4                      | 21                                             | src kinase associated phosphoprotein 2                                                      |
| 11                          | HLA-DMA     | 2                          | 5                       | 3                      | 7                                              | major histocompatibility complex, class II, DM alpha                                        |
| 12                          | SELL        | 2                          | 4                       | 4                      | 9                                              | selectin L (lymphocyte adhesion molecule 1)                                                 |
| 13                          | ADD3        | 2                          | 3                       | 3                      | 5                                              | adducin 3 (gamma)                                                                           |
| 14                          | LGALS9      | 2                          | 3                       | 3                      | 3                                              | lectin, galactoside-binding, soluble, 9 (galectin 9)                                        |

In order of preference, the genes are ranked by the number of t(15;17) related independent studies, the total number of independent studies, the total number of unique platforms, and the total number of features. Gene symbols are approved by HUGO Gene Nomenclature Committee.
