# Supplementary material for: Integrative Meta-Analysis of Differential Gene Expression in Acute Myeloid Leukemia
Source: PubMed Central journal article supplement (PMC2830886; doi:10.1371/journal.pone.0009466), 2010-03-01
Supplement: pone.0009466.s012.pdf [file pone.0009466.s012.pdf]

**Table S12. Top ranked genes associated with t(8;21)**

| Rank                        | Gene symbol       | no. of specific references | Total no. of references | Total no. of platforms | Total no. of differentially expressed features | Gene name                                                                              |
|-----------------------------|-------------------|----------------------------|-------------------------|------------------------|------------------------------------------------|----------------------------------------------------------------------------------------|
| <b>Up-regulated genes</b>   |                   |                            |                         |                        |                                                |                                                                                        |
| 1                           | POU4F1            | 7                          | 11                      | 3                      | 29                                             | POU class 4 homeobox 1                                                                 |
| 2                           | RUNX1T1           | 6                          | 10                      | 3                      | 34                                             | runt-related transcription factor 1; translocated to, 1 (cyclin D-related)             |
| 3                           | TRH               | 6                          | 10                      | 3                      | 21                                             | thyrotropin-releasing hormone                                                          |
| 4                           | RGS10             | 5                          | 8                       | 3                      | 17                                             | regulator of G-protein signaling 10                                                    |
| 5                           | PRAME             | 4                          | 8                       | 4                      | 11                                             | preferentially expressed antigen in melanoma                                           |
| 6                           | CAV1              | 4                          | 7                       | 3                      | 14                                             | caveolin 1, caveolae protein, 22kDa                                                    |
| 7                           | CACNA2D2          | 4                          | 6                       | 3                      | 9                                              | calcium channel, voltage-dependent, alpha 2/delta subunit 2                            |
| 8                           | C11orf9           | 4                          | 6                       | 3                      | 8                                              | chromosome 11 open reading frame 9                                                     |
| 9                           | TSPAN7            | 3                          | 10                      | 5                      | 16                                             | tetraspanin 7                                                                          |
| 10                          | PALM              | 3                          | 7                       | 4                      | 9                                              | paralemmin                                                                             |
| 11                          | GPM6B             | 3                          | 7                       | 3                      | 16                                             | glycoprotein M6B                                                                       |
| 12                          | BAIAP3            | 3                          | 6                       | 3                      | 8                                              | BAI1-associated protein 3                                                              |
| 13                          | ITGB4             | 3                          | 5                       | 3                      | 8                                              | integrin, beta 4                                                                       |
| 14                          | ROBO1             | 3                          | 5                       | 3                      | 8                                              | roundabout, axon guidance receptor, homolog 1 (Drosophila)                             |
| 15                          | HSPG2             | 3                          | 5                       | 3                      | 7                                              | heparan sulfate proteoglycan 2                                                         |
| 16                          | SCML2             | 3                          | 4                       | 4                      | 5                                              | sex comb on midleg-like 2 (Drosophila)                                                 |
| 17                          | JMJD2B            | 3                          | 4                       | 3                      | 10                                             | jumonji domain containing 2B                                                           |
| 18                          | SLC25A1           | 3                          | 4                       | 3                      | 9                                              | solute carrier family 25 (mitochondrial carrier; citrate transporter), member 1        |
| 19                          | PSD3              | 3                          | 4                       | 3                      | 8                                              | pleckstrin and Sec7 domain containing 3                                                |
| 20                          | NCALD             | 3                          | 4                       | 3                      | 6                                              | neurocalcin delta                                                                      |
| 21                          | SLCO4A1           | 3                          | 4                       | 3                      | 6                                              | solute carrier organic anion transporter family, member 4A1                            |
| <b>Down-regulated genes</b> |                   |                            |                         |                        |                                                |                                                                                        |
| 1                           | CTSW              | 4                          | 6                       | 3                      | 15                                             | cathepsin W                                                                            |
| 2                           | LCP1              | 4                          | 5                       | 2                      | 8                                              | lymphocyte cytosolic protein 1 (L-plastin)                                             |
| 3                           | CAPG              | 3                          | 7                       | 3                      | 13                                             | capping protein (actin filament), gelsolin-like                                        |
| 4                           | PLXNB2            | 3                          | 6                       | 3                      | 8                                              | plexin B2                                                                              |
| 5                           | LAPTM5            | 3                          | 5                       | 3                      | 9                                              | lysosomal associated multispinning membrane protein 5                                  |
| 6                           | WBSCR5*<br>(LAT2) | 3                          | 4                       | 2                      | 5                                              | linker for activation of T cells family, member 2                                      |
| 7                           | ECOP*             | 3                          | 3                       | 2                      | 4                                              | EGFR-coamplified and overexpressed protein                                             |
| 8                           | HOXB2             | 2                          | 12                      | 6                      | 32                                             | homeobox B2                                                                            |
| 9                           | MYH11             | 2                          | 10                      | 3                      | 38                                             | myosin, heavy chain 11, smooth muscle                                                  |
| 10                          | JAG1              | 2                          | 8                       | 3                      | 20                                             | jagged 1 (Alagille syndrome)                                                           |
| 11                          | TGFBI             | 2                          | 7                       | 4                      | 13                                             | transforming growth factor, beta-induced, 68kDa                                        |
| 12                          | SCHIP1            | 2                          | 7                       | 3                      | 8                                              | schwannomin interacting protein 1                                                      |
| 13                          | ITGB2             | 2                          | 6                       | 4                      | 17                                             | integrin, beta 2 (complement component 3 receptor 3 and 4 subunit)                     |
| 14                          | TNFAIP2           | 2                          | 6                       | 4                      | 12                                             | tumor necrosis factor, alpha-induced protein 2                                         |
| 15                          | PRKCD             | 2                          | 6                       | 4                      | 9                                              | protein kinase C, delta                                                                |
| 16                          | ALDH2             | 2                          | 6                       | 4                      | 8                                              | aldehyde dehydrogenase 2 family (mitochondrial)                                        |
| 17                          | ABR               | 2                          | 6                       | 3                      | 9                                              | active BCR-related gene                                                                |
| 18                          | ADCY7             | 2                          | 5                       | 3                      | 8                                              | adenylate cyclase 7                                                                    |
| 19                          | SERPING1          | 2                          | 4                       | 3                      | 10                                             | serpin peptidase inhibitor, clade G (C1 inhibitor), member 1, (angioedema, hereditary) |
| 20                          | PELL1             | 2                          | 4                       | 3                      | 5                                              | pellino homolog 1 (Drosophila)                                                         |

In order of preference, the genes are ranked by the number of t(8;21) related independent studies, the total number of independent studies, the total number of unique platforms, and the total number of features.

\*Gene symbol is not approved by HUGO Gene Nomenclature Committee. If a HUGO approved name does exist, it is placed in parenthesis.
