# Supplementary material for: Integrative Meta-Analysis of Differential Gene Expression in Acute Myeloid Leukemia
Source: PubMed Central journal article supplement (PMC2830886; doi:10.1371/journal.pone.0009466), 2010-03-01
Supplement: pone.0009466.s013.pdf [file pone.0009466.s013.pdf]

**Table S13. Functional categories of up-regulated genes associated with *NPM1* mutations**

| GO category                                                                                                               | Corrected p-value | No. of genes | Other tags with upregulated genes                                                                                                                 | Other tags with downregulated genes                                                                       |
|---------------------------------------------------------------------------------------------------------------------------|-------------------|--------------|---------------------------------------------------------------------------------------------------------------------------------------------------|-----------------------------------------------------------------------------------------------------------|
| <b>Biological Processes</b>                                                                                               |                   |              |                                                                                                                                                   |                                                                                                           |
| response to external stimulus                                                                                             | 1.76E-20          | 53           | <i>CD34+CD38+ fraction</i><br><i>good prognosis</i><br><i>inv(16)</i><br><i>MLL fusion gene</i><br><i>monocytic</i><br><i>normal cytogenetics</i> | <i>CD34+CD38- fraction</i><br><i>control</i><br><i>del(7q)</i><br><i>poor prognosis</i><br><i>t(8;21)</i> |
| response to wounding                                                                                                      | 3.59E-20          | 44           | <i>CD34+CD38+ fraction</i><br><i>good prognosis</i><br><i>inv(16)</i><br><i>MLL fusion gene</i><br><i>monocytic</i><br><i>normal cytogenetics</i> | <i>CD34+CD38- fraction</i><br><i>control</i><br><i>poor prognosis</i><br><i>t(8;21)</i>                   |
| inflammatory response                                                                                                     | 3.68E-14          | 31           | <i>CD34+CD38+ fraction</i><br><i>inv(16)</i><br><i>MLL fusion gene</i><br><i>monocytic</i>                                                        | <i>CD34+CD38- fraction</i><br><i>t(8;21)</i>                                                              |
| response to chemical stimulus                                                                                             | 4.87E-12          | 40           | <i>CD34+CD38+ fraction</i><br><i>good prognosis</i><br><i>inv(16)</i><br><i>normal cytogenetics</i>                                               | <i>11q23</i><br><i>CD34+CD38- fraction</i><br><i>poor prognosis</i><br><i>t(8;21)</i>                     |
| taxis                                                                                                                     | 6.36E-12          | 21           | <i>CD34+CD38+ fraction</i><br><i>inv(16)</i><br><i>MLL fusion gene</i>                                                                            | <i>CD34+CD38- fraction</i><br><i>control</i>                                                              |
| chemotaxis                                                                                                                | 6.36E-12          | 21           | <i>CD34+CD38+ fraction</i><br><i>inv(16)</i><br><i>MLL fusion gene</i>                                                                            | <i>CD34+CD38- fraction</i><br><i>control</i>                                                              |
| locomotory behavior                                                                                                       | 6.65E-11          | 22           | <i>CD34+CD38+ fraction</i><br><i>inv(16)</i>                                                                                                      | <i>11q23</i><br><i>CD34+CD38- fraction</i><br><i>control</i><br><i>t(8;21)</i>                            |
| immune effector process                                                                                                   | 2.54E-10          | 18           | <i>inv(16)</i>                                                                                                                                    | <i>t(8;21)</i>                                                                                            |
| negative regulation of developmental process                                                                              | 1.10E-09          | 27           | <i>good prognosis</i>                                                                                                                             | <i>FLT3 mutation</i><br><i>poor prognosis</i>                                                             |
| positive regulation of multicellular organismal process                                                                   | 2.97E-09          | 19           | <i>inv(16)</i>                                                                                                                                    | <i>t(8;21)</i>                                                                                            |
| behavior                                                                                                                  | 4.33E-09          | 25           | <i>CD34+CD38+ fraction</i><br><i>inv(16)</i>                                                                                                      | <i>CD34+CD38- fraction</i>                                                                                |
| positive regulation of immune system process                                                                              | 1.15E-08          | 17           | <i>good prognosis</i><br><i>inv(16)</i>                                                                                                           | <i>t(8;21)</i>                                                                                            |
| adaptive immune response based on somatic recombination of immune receptors built from immunoglobulin superfamily domains | 1.25E-08          | 14           |                                                                                                                                                   | <i>t(8;21)</i>                                                                                            |
| adaptive immune response                                                                                                  | 1.25E-08          | 14           |                                                                                                                                                   | <i>t(8;21)</i>                                                                                            |
| negative regulation of apoptosis                                                                                          | 5.20E-08          | 21           | <i>good prognosis</i>                                                                                                                             | <i>poor prognosis</i>                                                                                     |
| regulation of immune system process                                                                                       | 6.47E-08          | 18           | <i>good prognosis</i><br><i>inv(16)</i>                                                                                                           | <i>t(8;21)</i>                                                                                            |
| negative regulation of programmed cell death                                                                              | 6.63E-08          | 21           | <i>good prognosis</i>                                                                                                                             | <i>poor prognosis</i>                                                                                     |
| regulation of immune response                                                                                             | 3.34E-07          | 14           |                                                                                                                                                   | <i>t(8;21)</i>                                                                                            |
| acute inflammatory response                                                                                               | 3.40E-07          | 13           |                                                                                                                                                   |                                                                                                           |
| cytokine production                                                                                                       | 2.45E-06          | 14           | <i>CD34+CD38+ fraction</i><br><i>FAB-M4</i><br><i>FAB-M5</i><br><i>good prognosis</i><br><i>inv(16)</i>                                           | <i>CD34+CD38- fraction</i><br><i>t(8;21)</i>                                                              |
| positive regulation of signal transduction                                                                                | 3.51E-06          | 16           | <i>good prognosis</i><br><i>MLL fusion gene</i>                                                                                                   | <i>poor prognosis</i>                                                                                     |

|                                                                   |          |     |                                                                                                                |                                                                                                     |
|-------------------------------------------------------------------|----------|-----|----------------------------------------------------------------------------------------------------------------|-----------------------------------------------------------------------------------------------------|
| cellular metabolic process                                        | 4.51E-06 | 255 | <i>abnormal cytogenetics</i><br><i>high centrosome aberrations</i><br><i>MLL fusion gene</i><br><i>NRAS-PM</i> | <i>low centrosome aberrations</i>                                                                   |
| positive regulation of immune response                            | 5.56E-06 | 12  |                                                                                                                | <i>t(8;21)</i>                                                                                      |
| localization of cell                                              | 7.59E-06 | 24  | <i>CD34+CD38+ fraction</i><br><i>good prognosis</i><br><i>inv(16)</i><br><i>MLL fusion gene</i>                | <i>CD34+CD38- fraction</i><br><i>normal cytogenetics</i><br><i>poor prognosis</i><br><i>t(8;21)</i> |
| cell motility                                                     | 7.59E-06 | 24  | <i>CD34+CD38+ fraction</i><br><i>good prognosis</i><br><i>inv(16)</i><br><i>MLL fusion gene</i>                | <i>CD34+CD38- fraction</i><br><i>normal cytogenetics</i><br><i>poor prognosis</i><br><i>t(8;21)</i> |
| regulation of cytokine production                                 | 1.02E-05 | 9   | <i>good prognosis</i><br><i>normal cytogenetics</i>                                                            |                                                                                                     |
| production of molecular mediator of immune response               | 1.05E-05 | 8   | <i>inv(16)</i>                                                                                                 | <i>t(8;21)</i>                                                                                      |
| response to other organism                                        | 1.40E-05 | 17  | <i>CD34+CD38+ fraction</i><br><i>FAB-M4</i><br><i>FAB-M5</i><br><i>good prognosis</i>                          | <i>CD34+CD38- fraction</i><br><i>poor prognosis</i>                                                 |
| transcription from RNA polymerase II promoter                     | 1.51E-05 | 31  | <i>abnormal cytogenetics</i><br><i>good prognosis</i><br><i>inv(16)</i>                                        | <i>del(7q)</i><br><i>MLL fusion gene</i><br><i>poor prognosis</i><br><i>t(8;21)</i>                 |
| humoral immune response                                           | 1.59E-05 | 11  | <i>inv(16)</i>                                                                                                 | <i>t(8;21)</i>                                                                                      |
| regulation of cell proliferation                                  | 1.61E-05 | 26  | <i>aneuploid</i><br><i>CD34+CD38- fraction</i><br><i>good prognosis</i><br><i>MLL fusion gene</i>              | <i>CD34+CD38+ fraction</i><br><i>euploid</i><br><i>poor prognosis</i><br><i>t(8;21)</i>             |
| regulation of cell differentiation                                | 1.70E-05 | 15  | <i>good prognosis</i>                                                                                          |                                                                                                     |
| primary metabolic process                                         | 1.95E-05 | 253 | <i>abnormal cytogenetics</i><br><i>normal cytogenetics</i>                                                     | <i>CEBPA mutation</i>                                                                               |
| I-kappaB kinase/NF-kappaB cascade                                 | 1.96E-05 | 14  | <i>good prognosis</i><br><i>MLL fusion gene</i>                                                                | <i>poor prognosis</i>                                                                               |
| regulation of multicellular organismal process                    | 2.56E-05 | 21  | <i>FAB-M7</i><br><i>good prognosis</i><br><i>inv(16)</i>                                                       | <i>t(8;21)</i>                                                                                      |
| cytokine production during immune response                        | 2.96E-05 | 6   | <i>normal cytogenetics</i>                                                                                     |                                                                                                     |
| regulation of myeloid cell differentiation                        | 3.96E-05 | 8   |                                                                                                                |                                                                                                     |
| organ morphogenesis                                               | 3.98E-05 | 22  | <i>good prognosis</i><br><i>inv(16)</i><br><i>normal cytogenetics</i>                                          | <i>poor prognosis</i><br><i>t(8;21)</i>                                                             |
| leukocyte mediated immunity                                       | 4.15E-05 | 11  | <i>good prognosis</i><br><i>inv(16)</i><br><i>normal cytogenetics</i>                                          | <i>t(8;21)</i>                                                                                      |
| regulation of I-kappaB kinase/NF-kappaB cascade                   | 5.64E-05 | 12  | <i>MLL fusion gene</i>                                                                                         |                                                                                                     |
| positive regulation of cytokine production                        | 6.17E-05 | 7   |                                                                                                                |                                                                                                     |
| regulation of response to stimulus                                | 8.07E-05 | 14  | <i>good prognosis</i>                                                                                          | <i>t(8;21)</i>                                                                                      |
| activation of immune response                                     | 8.09E-05 | 10  |                                                                                                                | <i>t(8;21)</i>                                                                                      |
| regulation of production of molecular mediator of immune response | 8.79E-05 | 5   | <i>good prognosis</i><br><i>normal cytogenetics</i>                                                            |                                                                                                     |
| regulation of cytokine production during immune response          | 8.79E-05 | 5   | <i>good prognosis</i><br><i>normal cytogenetics</i>                                                            |                                                                                                     |
| protein kinase cascade                                            | 8.91E-05 | 22  | <i>good prognosis</i><br><i>MLL fusion gene</i>                                                                | <i>poor prognosis</i>                                                                               |
| positive regulation of response to stimulus                       | 1.00E-04 | 12  |                                                                                                                |                                                                                                     |
| positive regulation of lymphocyte activation                      | 1.20E-04 | 9   | <i>good prognosis</i>                                                                                          |                                                                                                     |
| lymphocyte mediated immunity                                      | 1.80E-04 | 10  |                                                                                                                | <i>t(8;21)</i>                                                                                      |

|                                                                                                                                         |          |     |                                                                     |                                                                                      |
|-----------------------------------------------------------------------------------------------------------------------------------------|----------|-----|---------------------------------------------------------------------|--------------------------------------------------------------------------------------|
| positive regulation of I-kappaB kinase/NF-kappaB cascade                                                                                | 1.90E-04 | 11  | <i>MLL fusion gene</i>                                              |                                                                                      |
| positive regulation of cellular biosynthetic process                                                                                    | 2.00E-04 | 10  |                                                                     |                                                                                      |
| positive regulation of biosynthetic process                                                                                             | 2.00E-04 | 10  |                                                                     |                                                                                      |
| intracellular signaling cascade                                                                                                         | 2.00E-04 | 61  | <i>good prognosis<br/>inv(16)<br/>MLL fusion gene</i>               | <i>poor prognosis<br/>t(8;21)</i>                                                    |
| positive regulation of cell activation                                                                                                  | 2.20E-04 | 9   | <i>good prognosis</i>                                               |                                                                                      |
| positive regulation of leukocyte activation                                                                                             | 2.20E-04 | 9   | <i>good prognosis</i>                                               |                                                                                      |
| regulation of cellular metabolic process                                                                                                | 2.30E-04 | 102 | <i>good prognosis<br/>high centrosome aberrations</i>               | <i>CEBPA mutation<br/>low centrosome aberrations<br/>poor prognosis<br/>t(15;17)</i> |
| macromolecule metabolic process                                                                                                         | 3.30E-04 | 217 | <i>abnormal cytogenetics<br/>aneuploid</i>                          | <i>euploid</i>                                                                       |
| regulation of nucleobase, nucleoside, nucleotide and nucleic acid metabolic process                                                     | 3.70E-04 | 95  | <i>good prognosis</i>                                               | <i>abnormal cytogenetics<br/>CEBPA mutation<br/>poor prognosis</i>                   |
| nucleobase, nucleoside, nucleotide and nucleic acid metabolic process                                                                   | 4.20E-04 | 130 | <i>abnormal cytogenetics<br/>good prognosis</i>                     | <i>poor prognosis</i>                                                                |
| metabolic process                                                                                                                       | 4.30E-04 | 278 | <i>abnormal cytogenetics</i>                                        | <i>euploid</i>                                                                       |
| multi-organism process                                                                                                                  | 4.50E-04 | 19  | <i>CD34+CD38+ fraction<br/>FAB-M4<br/>FAB-M5<br/>good prognosis</i> | <i>CD34+CD38- fraction<br/>poor prognosis</i>                                        |
| response to bacterium                                                                                                                   | 5.40E-04 | 11  | <i>CD34+CD38+ fraction</i>                                          | <i>CD34+CD38- fraction</i>                                                           |
| regulation of metabolic process                                                                                                         | 5.40E-04 | 103 | <i>good prognosis<br/>high centrosome aberrations</i>               | <i>CEBPA mutation<br/>low centrosome aberrations<br/>poor prognosis<br/>t(15;17)</i> |
| regulation of cell activation                                                                                                           | 9.20E-04 | 10  | <i>good prognosis<br/>inv(16)</i>                                   | <i>t(8;21)</i>                                                                       |
| regulation of leukocyte activation                                                                                                      | 9.20E-04 | 10  | <i>good prognosis<br/>inv(16)</i>                                   | <i>t(8;21)</i>                                                                       |
| cell activation                                                                                                                         | 9.70E-04 | 15  | <i>good prognosis<br/>inv(16)</i>                                   | <i>t(8;21)</i>                                                                       |
| regulation of body fluid levels                                                                                                         | 9.90E-04 | 12  |                                                                     | <i>t(8;21)</i>                                                                       |
| biopolymer metabolic process                                                                                                            | 1.22E-03 | 165 | <i>abnormal cytogenetics<br/>aneuploid<br/>CD34+CD38- fraction</i>  | <i>CD34+CD38+ fraction<br/>euploid</i>                                               |
| cellular defense response                                                                                                               | 1.30E-03 | 9   | <i>CD34+CD38+ fraction</i>                                          | <i>CD34+CD38- fraction</i>                                                           |
| positive regulation of translation                                                                                                      | 1.57E-03 | 8   |                                                                     |                                                                                      |
| hemostasis                                                                                                                              | 1.60E-03 | 11  | <i>inv(16)</i>                                                      | <i>t(8;21)</i>                                                                       |
| activation of plasma proteins during acute inflammatory response                                                                        | 1.64E-03 | 7   |                                                                     |                                                                                      |
| complement activation                                                                                                                   | 1.64E-03 | 7   |                                                                     |                                                                                      |
| innate immune response                                                                                                                  | 1.74E-03 | 11  |                                                                     |                                                                                      |
| wound healing                                                                                                                           | 1.82E-03 | 12  | <i>inv(16)</i>                                                      | <i>t(8;21)</i>                                                                       |
| transcription, DNA-dependent                                                                                                            | 1.90E-03 | 87  | <i>good prognosis</i>                                               | <i>abnormal cytogenetics<br/>CEBPA mutation<br/>poor prognosis</i>                   |
| regulation of adaptive immune response based on somatic recombination of immune receptors built from immunoglobulin superfamily domains | 1.94E-03 | 5   | <i>normal cytogenetics</i>                                          |                                                                                      |
| regulation of transcription from RNA polymerase II promoter                                                                             | 1.94E-03 | 21  | <i>good prognosis<br/>normal cytogenetics</i>                       | <i>CEBPA mutation<br/>MLL fusion gene<br/>t(8;21)</i>                                |
| regulation of adaptive immune response                                                                                                  | 1.94E-03 | 5   | <i>normal cytogenetics</i>                                          |                                                                                      |

|                                                           |          |     |                                                       |                                                                                                   |
|-----------------------------------------------------------|----------|-----|-------------------------------------------------------|---------------------------------------------------------------------------------------------------|
| transcription                                             | 1.99E-03 | 94  | <i>good prognosis</i>                                 | <i>abnormal cytogenetics</i><br><i>CEBPA mutation</i><br><i>poor prognosis</i>                    |
| response to biotic stimulus                               | 2.04E-03 | 17  | <i>CD34+CD38+ fraction</i><br><i>good prognosis</i>   | <i>CD34+CD38- fraction</i><br><i>poor prognosis</i>                                               |
| positive regulation of apoptosis                          | 2.04E-03 | 16  | <i>good prognosis</i>                                 |                                                                                                   |
| RNA biosynthetic process                                  | 2.06E-03 | 87  | <i>good prognosis</i>                                 | <i>abnormal cytogenetics</i><br><i>CEBPA mutation</i><br><i>poor prognosis</i>                    |
| anti-apoptosis                                            | 2.08E-03 | 13  | <i>good prognosis</i>                                 | <i>poor prognosis</i>                                                                             |
| positive regulation of programmed cell death              | 2.38E-03 | 16  | <i>good prognosis</i>                                 |                                                                                                   |
| regulation of immune effector process                     | 2.47E-03 | 6   | <i>good prognosis</i><br><i>normal cytogenetics</i>   |                                                                                                   |
| myeloid cell differentiation                              | 2.59E-03 | 9   |                                                       |                                                                                                   |
| regulation of DNA metabolic process                       | 2.72E-03 | 8   |                                                       |                                                                                                   |
| RNA metabolic process                                     | 2.77E-03 | 100 | <i>abnormal cytogenetics</i><br><i>good prognosis</i> | <i>poor prognosis</i>                                                                             |
| positive regulation of cell proliferation                 | 2.82E-03 | 15  | <i>inv(16)</i><br><i>MLL fusion gene</i>              | <i>poor prognosis</i><br><i>t(8;21)</i>                                                           |
| positive regulation of cytokine biosynthetic process      | 3.27E-03 | 7   |                                                       |                                                                                                   |
| induction of apoptosis                                    | 3.40E-03 | 14  | <i>good prognosis</i>                                 |                                                                                                   |
| cell surface receptor linked signal transduction          | 3.54E-03 | 66  |                                                       |                                                                                                   |
| regulation of lymphocyte activation                       | 3.56E-03 | 9   |                                                       |                                                                                                   |
| induction of programmed cell death                        | 3.59E-03 | 14  | <i>good prognosis</i>                                 |                                                                                                   |
| regulation of cytokine biosynthetic process               | 3.99E-03 | 8   |                                                       | <i>FLT3 mutation</i>                                                                              |
| positive regulation of T cell activation                  | 4.49E-03 | 7   | <i>good prognosis</i>                                 |                                                                                                   |
| regulation of T cell activation                           | 5.09E-03 | 8   | <i>good prognosis</i>                                 |                                                                                                   |
| positive regulation of cellular protein metabolic process | 6.44E-03 | 10  |                                                       |                                                                                                   |
| regulation of transcription                               | 6.76E-03 | 89  | <i>good prognosis</i>                                 | <i>abnormal cytogenetics</i><br><i>CEBPA mutation</i><br><i>poor prognosis</i>                    |
| blood coagulation                                         | 7.57E-03 | 10  |                                                       | <i>t(8;21)</i>                                                                                    |
| blood vessel development                                  | 7.58E-03 | 12  | <i>good prognosis</i><br><i>inv(16)</i>               | <i>MLL fusion gene</i><br><i>t(8;21)</i>                                                          |
| positive regulation of protein metabolic process          | 8.87E-03 | 10  |                                                       |                                                                                                   |
| cytokine biosynthetic process                             | 9.00E-03 | 8   |                                                       | <i>FLT3 mutation</i>                                                                              |
| vasculature development                                   | 9.12E-03 | 12  | <i>good prognosis</i><br><i>inv(16)</i>               | <i>MLL fusion gene</i><br><i>t(8;21)</i>                                                          |
| regulation of gene expression                             | 9.49E-03 | 92  | <i>good prognosis</i>                                 | <i>abnormal cytogenetics</i><br><i>CEBPA mutation</i><br><i>poor prognosis</i><br><i>t(15;17)</i> |
| response to molecule of bacterial origin                  | 9.61E-03 | 4   | <i>good prognosis</i>                                 | <i>poor prognosis</i>                                                                             |
| T-helper 2 type immune response                           | 9.61E-03 | 4   |                                                       |                                                                                                   |

#### Molecular Functions

|                               |          |    |                            |                                                                                             |
|-------------------------------|----------|----|----------------------------|---------------------------------------------------------------------------------------------|
| sequence-specific DNA binding | 2.33E-09 | 44 | <i>FLT3-ITD</i>            | <i>abnormal cytogenetics</i><br><i>control</i><br><i>t(15;17)</i>                           |
| DNA binding                   | 6.02E-06 | 96 | <i>good prognosis</i>      | <i>abnormal cytogenetics</i><br><i>poor prognosis</i>                                       |
| cytokine activity             | 2.90E-05 | 20 | <i>CD34+CD38+ fraction</i> | <i>CD34+CD38- fraction</i>                                                                  |
| transcription factor activity | 4.20E-05 | 51 | <i>good prognosis</i>      | <i>abnormal cytogenetics</i><br><i>control</i><br><i>MLL fusion gene</i><br><i>t(15;17)</i> |

|                                    |          |    |                                         |                                                                                                                      |
|------------------------------------|----------|----|-----------------------------------------|----------------------------------------------------------------------------------------------------------------------|
| chemokine activity                 | 5.73E-05 | 10 |                                         | 11q23                                                                                                                |
| chemokine receptor binding         | 6.52E-05 | 10 |                                         | 11q23                                                                                                                |
| transcription activator activity   | 1.10E-04 | 19 | <i>good prognosis</i><br><i>inv(16)</i> | <i>poor prognosis</i><br><i>t(8;21)</i>                                                                              |
| receptor binding                   | 1.10E-04 | 39 | 11q23<br><i>inv(16)</i>                 | <i>t(8;21)</i>                                                                                                       |
| transcription regulator activity   | 3.80E-04 | 62 | <i>good prognosis</i>                   | <i>abnormal cytogenetics</i><br><i>control</i><br><i>MLL fusion gene</i><br><i>poor prognosis</i><br><i>t(15;17)</i> |
| G-protein-coupled receptor binding | 1.16E-03 | 10 |                                         |                                                                                                                      |
| transcription factor binding       | 8.59E-03 | 19 | <i>good prognosis</i>                   | <i>poor prognosis</i>                                                                                                |

### Cellular Components

|                                              |          |     |                                                                                                                                                                 |                                                                       |
|----------------------------------------------|----------|-----|-----------------------------------------------------------------------------------------------------------------------------------------------------------------|-----------------------------------------------------------------------|
| extracellular space                          | 1.15E-16 | 43  | 11q23<br><i>CD34+CD38+ fraction</i><br><i>FLT3 mutation</i><br><i>inv(16)</i>                                                                                   | <i>CD34+CD38- fraction</i><br><i>t(8;21)</i>                          |
| extracellular region part                    | 3.00E-13 | 51  | 11q23<br><i>CD34+CD38+ fraction</i><br><i>FLT3 mutation</i><br><i>inv(16)</i>                                                                                   | <i>CD34+CD38- fraction</i><br><i>t(8;21)</i>                          |
| extracellular region                         | 4.36E-09 | 80  | 11q23<br><i>CD34+CD38+ fraction</i><br><i>inv(16)</i><br><i>t(15;17)</i>                                                                                        | <i>CD34+CD38- fraction</i><br><i>t(8;21)</i>                          |
| intracellular organelle part                 | 1.54E-06 | 110 | <i>abnormal cytogenetics</i><br><i>aneuploid</i><br><i>CD34+CD38+ fraction</i><br><i>CEBPA silenced</i><br><i>MLL fusion gene</i><br><i>normal cytogenetics</i> | <i>CD34+CD38- fraction</i><br><i>CEBPA mutation</i><br><i>euploid</i> |
| organelle part                               | 1.75E-06 | 110 | <i>abnormal cytogenetics</i><br><i>aneuploid</i><br><i>CD34+CD38+ fraction</i><br><i>CEBPA silenced</i><br><i>MLL fusion gene</i><br><i>normal cytogenetics</i> | <i>CD34+CD38- fraction</i><br><i>CEBPA mutation</i><br><i>euploid</i> |
| nuclear part                                 | 1.08E-03 | 38  | <i>abnormal cytogenetics</i><br><i>aneuploid</i><br><i>normal cytogenetics</i>                                                                                  | <i>euploid</i>                                                        |
| DNA-directed RNA polymerase complex          | 1.59E-03 | 6   |                                                                                                                                                                 |                                                                       |
| nuclear DNA-directed RNA polymerase complex  | 1.59E-03 | 6   |                                                                                                                                                                 |                                                                       |
| chromosome                                   | 2.15E-03 | 23  | <i>CD34+CD38+ fraction</i>                                                                                                                                      | <i>CD34+CD38- fraction</i>                                            |
| RNA polymerase complex                       | 3.17E-03 | 6   |                                                                                                                                                                 |                                                                       |
| DNA-directed RNA polymerase II, core complex | 3.66E-03 | 5   |                                                                                                                                                                 |                                                                       |
| chromosomal part                             | 5.61E-03 | 20  | <i>CD34+CD38+ fraction</i>                                                                                                                                      | <i>CD34+CD38- fraction</i>                                            |
| endomembrane system                          | 6.45E-03 | 34  | <i>CEBPA silenced</i><br><i>good prognosis</i><br><i>inv(16)</i><br><i>MLL fusion gene</i>                                                                      | <i>CEBPA mutation</i><br><i>poor prognosis</i><br><i>t(8;21)</i>      |

Significantly over-represented functional gene ontology (GO) categories of up-regulated genes associated with *NPM1* mutations are presented here. GO categories that are also over-represented in down-regulated genes associated with *NPM1* mutations are not included. Corrected p-value is the Bonferroni multiple hypothesis. Identification tags that are both up-regulated and down-regulated are not included in the 'other tags' columns. Identification tag descriptions can be found in Table S1.
