# Supplementary material for: Integrative Meta-Analysis of Differential Gene Expression in Acute Myeloid Leukemia
Source: PubMed Central journal article supplement (PMC2830886; doi:10.1371/journal.pone.0009466), 2010-03-01
Supplement: pone.0009466.s014.pdf [file pone.0009466.s014.pdf]

**Table S14. Functional categories of down-regulated genes associated with *NPM1* mutations**

| GO category                                            | Corrected p-value | No. of genes | Other tags with downregulated genes                                                                                           | Other tags with upregulated genes                                                                             |
|--------------------------------------------------------|-------------------|--------------|-------------------------------------------------------------------------------------------------------------------------------|---------------------------------------------------------------------------------------------------------------|
| <b>Biological Processes</b>                            |                   |              |                                                                                                                               |                                                                                                               |
| cell cycle process                                     | 2.63E-13          | 36           | <i>CD34+CD38- fraction</i><br><i>euploid</i><br><i>FLT3-ITD</i><br><i>good prognosis</i><br><i>low centrosome aberrations</i> | <i>aneuploid</i><br><i>CD34+CD38+ fraction</i><br><i>high centrosome aberrations</i><br><i>poor prognosis</i> |
| cell cycle phase                                       | 4.63E-13          | 32           | <i>CD34+CD38- fraction</i><br><i>euploid</i><br><i>FLT3-ITD</i><br><i>good prognosis</i><br><i>low centrosome aberrations</i> | <i>aneuploid</i><br><i>CD34+CD38+ fraction</i><br><i>high centrosome aberrations</i><br><i>poor prognosis</i> |
| mitotic cell cycle                                     | 1.49E-12          | 30           | <i>CD34+CD38- fraction</i><br><i>euploid</i><br><i>FLT3-ITD</i><br><i>good prognosis</i><br><i>low centrosome aberrations</i> | <i>aneuploid</i><br><i>CD34+CD38+ fraction</i><br><i>high centrosome aberrations</i><br><i>poor prognosis</i> |
| M phase                                                | 3.09E-10          | 26           | <i>CD34+CD38- fraction</i><br><i>euploid</i><br><i>good prognosis</i>                                                         | <i>aneuploid</i><br><i>CD34+CD38+ fraction</i><br><i>poor prognosis</i>                                       |
| M phase of mitotic cell cycle                          | 4.17E-09          | 22           | <i>CD34+CD38- fraction</i><br><i>euploid</i><br><i>FLT3-ITD</i><br><i>good prognosis</i>                                      | <i>aneuploid</i><br><i>CD34+CD38+ fraction</i><br><i>poor prognosis</i>                                       |
| regulation of protein kinase activity                  | 1.03E-08          | 22           | <i>euploid</i><br><i>low centrosome aberrations</i>                                                                           | <i>aneuploid</i><br><i>high centrosome aberrations</i>                                                        |
| regulation of kinase activity                          | 1.53E-08          | 22           | <i>euploid</i><br><i>low centrosome aberrations</i>                                                                           | <i>aneuploid</i><br><i>high centrosome aberrations</i>                                                        |
| mitosis                                                | 1.89E-08          | 21           | <i>CD34+CD38- fraction</i><br><i>euploid</i><br><i>FLT3-ITD</i><br><i>good prognosis</i>                                      | <i>aneuploid</i><br><i>CD34+CD38+ fraction</i><br><i>poor prognosis</i>                                       |
| regulation of transferase activity                     | 2.26E-08          | 22           | <i>euploid</i><br><i>low centrosome aberrations</i>                                                                           | <i>aneuploid</i><br><i>high centrosome aberrations</i>                                                        |
| hemopoiesis                                            | 1.30E-06          | 16           | <i>poor prognosis</i>                                                                                                         | <i>good prognosis</i><br><i>inv(16)</i>                                                                       |
| hemopoietic or lymphoid organ development              | 3.74E-06          | 16           | <i>poor prognosis</i>                                                                                                         | <i>good prognosis</i><br><i>inv(16)</i>                                                                       |
| regulation of molecular function                       | 1.11E-05          | 32           | <i>euploid</i><br><i>low centrosome aberrations</i>                                                                           | <i>aneuploid</i><br><i>good prognosis</i><br><i>high centrosome aberrations</i>                               |
| regulation of catalytic activity                       | 1.51E-05          | 30           | <i>euploid</i><br><i>low centrosome aberrations</i>                                                                           | <i>aneuploid</i><br><i>good prognosis</i><br><i>high centrosome aberrations</i>                               |
| regulation of cyclin-dependent protein kinase activity | 3.60E-05          | 9            | <i>euploid</i><br><i>low centrosome aberrations</i>                                                                           | <i>aneuploid</i><br><i>high centrosome aberrations</i>                                                        |
| interphase of mitotic cell cycle                       | 3.71E-05          | 11           | <i>CD34+CD38- fraction</i><br><i>euploid</i><br><i>good prognosis</i><br><i>low centrosome aberrations</i>                    | <i>aneuploid</i><br><i>CD34+CD38+ fraction</i><br><i>high centrosome aberrations</i><br><i>poor prognosis</i> |
| interphase                                             | 7.56E-05          | 11           | <i>CD34+CD38- fraction</i><br><i>euploid</i><br><i>good prognosis</i><br><i>low centrosome aberrations</i>                    | <i>aneuploid</i><br><i>CD34+CD38+ fraction</i><br><i>high centrosome aberrations</i><br><i>poor prognosis</i> |
| cell division                                          | 1.00E-04          | 17           | <i>CD34+CD38- fraction</i><br><i>euploid</i><br><i>good prognosis</i><br><i>low centrosome aberrations</i>                    | <i>aneuploid</i><br><i>CD34+CD38+ fraction</i><br><i>high centrosome aberrations</i><br><i>poor prognosis</i> |
| nervous system development                             | 1.90E-04          | 30           | <i>CD34+CD38+ fraction</i><br><i>inv(16)</i><br><i>poor prognosis</i>                                                         | <i>CD34+CD38- fraction</i><br><i>good prognosis</i>                                                           |
| leukocyte differentiation                              | 5.20E-04          | 10           |                                                                                                                               |                                                                                                               |
| leukocyte activation                                   | 1.92E-03          | 13           | <i>FLT3 mutation</i><br><i>t(8;21)</i>                                                                                        | <i>inv(16)</i>                                                                                                |

|                                      |          |    |                                                           |                                                            |
|--------------------------------------|----------|----|-----------------------------------------------------------|------------------------------------------------------------|
| membrane organization and biogenesis | 3.37E-03 | 16 | <i>CD34+CD38- fraction<br/>poor prognosis<br/>t(8;21)</i> | <i>CD34+CD38+ fraction<br/>inv(16)<br/>MLL fusion gene</i> |
| catabolic process                    | 5.10E-03 | 34 |                                                           | <i>MLL fusion gene</i>                                     |
| barbed-end actin filament capping    | 8.47E-03 | 5  |                                                           |                                                            |
| actin filament capping               | 8.47E-03 | 5  |                                                           |                                                            |

#### Molecular Functions

|                              |          |    |                                                                                  |                                                                          |
|------------------------------|----------|----|----------------------------------------------------------------------------------|--------------------------------------------------------------------------|
| identical protein binding    | 3.81E-05 | 21 | <i>CD34+CD38+ fraction<br/>FLT3 mutation<br/>normal cytogenetics<br/>t(8;21)</i> | <i>abnormal cytogenetics<br/>CD34+CD38- fraction<br/>MLL fusion gene</i> |
| GTPase activity              | 2.34E-03 | 16 |                                                                                  |                                                                          |
| cytoskeletal protein binding | 4.28E-03 | 24 |                                                                                  | <i>MLL fusion gene</i>                                                   |
| cytokine binding             | 6.78E-03 | 9  |                                                                                  |                                                                          |

#### Cellular Components

|                    |          |     |                                                           |                                                                         |
|--------------------|----------|-----|-----------------------------------------------------------|-------------------------------------------------------------------------|
| soluble fraction   | 9.72E-06 | 17  |                                                           |                                                                         |
| cytoplasmic part   | 4.28E-05 | 109 | <i>FLT3-ITD<br/>normal cytogenetics<br/>t(8;21)</i>       | <i>abnormal cytogenetics<br/>FAB-M7<br/>inv(16)<br/>MLL fusion gene</i> |
| actin cytoskeleton | 2.00E-04 | 18  |                                                           |                                                                         |
| cytoskeleton       | 2.10E-04 | 46  | <i>euploid<br/>good prognosis</i>                         | <i>aneuploid</i>                                                        |
| cell surface       | 3.50E-04 | 12  |                                                           |                                                                         |
| spindle            | 4.60E-04 | 9   | <i>CD34+CD38- fraction<br/>euploid<br/>good prognosis</i> | <i>aneuploid<br/>CD34+CD38+ fraction<br/>poor prognosis</i>             |
| coated pit         | 4.60E-04 | 7   |                                                           |                                                                         |

Significantly over-represented functional gene ontology (GO) categories of down-regulated genes associated with *NPM1* mutations are presented here. GO categories that are also over-represented in up-regulated genes associated with *NPM1* mutations are not included. Corrected p-value is the Bonferroni multiple hypothesis. Identification tags that are both up-regulated and down-regulated are not included in the 'other tags' columns. Identification tag descriptions can be found in Table S1.
