# Supplementary material for: Integrative Meta-Analysis of Differential Gene Expression in Acute Myeloid Leukemia
Source: PubMed Central journal article supplement (PMC2830886; doi:10.1371/journal.pone.0009466), 2010-03-01
Supplement: pone.0009466.s015.pdf [file pone.0009466.s015.pdf]

**Table S15. Functional categories of up-regulated genes associated with t(15;17)**

| GO category                        | Corrected p-value | No. of genes | Other tags with upregulated genes                                                    | Other tags with downregulated genes    |
|------------------------------------|-------------------|--------------|--------------------------------------------------------------------------------------|----------------------------------------|
| <b>Biological Processes</b>        |                   |              |                                                                                      |                                        |
| system development                 | 1.62E-05          | 21           | <i>CD34+CD38- fraction</i>                                                           | <i>CD34+CD38+ fraction t(8;21)</i>     |
| <b>Molecular Functions</b>         |                   |              |                                                                                      |                                        |
| calcium ion binding                | 2.04E-03          | 16           | <i>inv(16)</i>                                                                       |                                        |
| <b>Cellular Components</b>         |                   |              |                                                                                      |                                        |
| cytoplasm                          | 3.30E-03          | 44           | <i>abnormal cytogenetics<br/>aneuploid<br/>FAB-M7<br/>FLT3-ITD<br/>FLT3 mutation</i> | <i>euploid<br/>normal cytogenetics</i> |
| endoplasmic reticulum lumen        | 5.59E-03          | 4            |                                                                                      |                                        |
| proteinaceous extracellular matrix | 6.49E-03          | 8            |                                                                                      |                                        |
| extracellular region               | 7.95E-03          | 20           | <i>11q23<br/>CD34+CD38+ fraction<br/>inv(16)<br/>NPM1 mutation</i>                   | <i>CD34+CD38- fraction t(8;21)</i>     |
| extracellular matrix               | 8.13E-03          | 8            |                                                                                      |                                        |

Significantly over-represented functional gene ontologt (GO) categories of up-regulated genes associated with t(15;17) are presented here. GO categories that are also over-represented in down-regulated genes associated with t(15;17) are not included. Corrected p-value is the Bonferroni multiple hypothesis. Identification tags that are both up-regulated and down-regulated are not included in the 'other tags' columns. Identification tag descriptions can be found in Table S1.
