# Supplementary material for: Integrative Meta-Analysis of Differential Gene Expression in Acute Myeloid Leukemia
Source: PubMed Central journal article supplement (PMC2830886; doi:10.1371/journal.pone.0009466), 2010-03-01
Supplement: pone.0009466.s016.pdf [file pone.0009466.s016.pdf]

**Table S16. Functional categories of down-regulated genes associated with t(15;17)**

| GO category                                                                               | Corrected p-value | No. of genes | Other tags with downregulated genes                                                                                                                                    | Other tags with upregulated genes                                                                                                                         |
|-------------------------------------------------------------------------------------------|-------------------|--------------|------------------------------------------------------------------------------------------------------------------------------------------------------------------------|-----------------------------------------------------------------------------------------------------------------------------------------------------------|
| <b>Biological Processes</b>                                                               |                   |              |                                                                                                                                                                        |                                                                                                                                                           |
| biological regulation                                                                     | 1.40E-07          | 34           | <i>CD34+CD38- fraction</i><br><i>CEBPA mutation</i><br><i>control</i><br><i>del(7q)</i><br><i>euploid</i><br><i>low centrosome aberrations</i><br><i>t(8;21)</i>       | <i>aneuploid</i><br><i>CD34+CD38+ fraction</i><br><i>CEBPA silenced</i><br><i>high centrosome aberrations</i><br><i>normal cytogenetics</i>               |
| regulation of biological process                                                          | 2.33E-07          | 32           | <i>CD34+CD38- fraction</i><br><i>CEBPA mutation</i><br><i>del(7q)</i><br><i>euploid</i><br><i>FLT3 mutation</i><br><i>low centrosome aberrations</i><br><i>t(8;21)</i> | <i>aneuploid</i><br><i>CD34+CD38+ fraction</i><br><i>CEBPA silenced</i><br><i>high centrosome aberrations</i><br><i>inv(16)</i><br><i>MLL fusion gene</i> |
| regulation of cellular process                                                            | 3.21E-07          | 31           | <i>CD34+CD38- fraction</i><br><i>CEBPA mutation</i><br><i>euploid</i><br><i>FLT3 mutation</i><br><i>low centrosome aberrations</i><br><i>t(8;21)</i>                   | <i>aneuploid</i><br><i>CD34+CD38+ fraction</i><br><i>CEBPA silenced</i><br><i>high centrosome aberrations</i><br><i>inv(16)</i><br><i>MLL fusion gene</i> |
| antigen processing and presentation of peptide or polysaccharide antigen via MHC class II | 1.07E-05          | 6            | <i>normal cytogenetics</i>                                                                                                                                             |                                                                                                                                                           |
| anatomical structure morphogenesis                                                        | 8.23E-05          | 11           | <i>poor prognosis</i><br><i>t(8;21)</i>                                                                                                                                | <i>FLT3-ITD</i><br><i>FLT3 mutation</i><br><i>good prognosis</i><br><i>MLL fusion gene</i><br><i>normal cytogenetics</i>                                  |
| regulation of metabolic process                                                           | 3.50E-04          | 22           | <i>CEBPA mutation</i><br><i>low centrosome aberrations</i><br><i>poor prognosis</i>                                                                                    | <i>good prognosis</i><br><i>high centrosome aberrations</i><br><i>NPM1 mutation</i>                                                                       |
| regulation of cellular metabolic process                                                  | 8.90E-04          | 21           | <i>CEBPA mutation</i><br><i>low centrosome aberrations</i><br><i>poor prognosis</i>                                                                                    | <i>good prognosis</i><br><i>high centrosome aberrations</i><br><i>NPM1 mutation</i>                                                                       |
| immune system process                                                                     | 1.02E-03          | 12           | <i>CD34+CD38- fraction</i><br><i>FLT3 mutation</i><br><i>normal cytogenetics</i><br><i>t(8;21)</i>                                                                     | <i>CD34+CD38+ fraction</i><br><i>FAB-M4</i><br><i>FAB-M5</i><br><i>inv(16)</i><br><i>MLL fusion gene</i><br><i>monocytic</i>                              |
| antigen processing and presentation                                                       | 1.26E-03          | 7            | <i>normal cytogenetics</i>                                                                                                                                             |                                                                                                                                                           |
| regulation of gene expression                                                             | 1.64E-03          | 20           | <i>abnormal cytogenetics</i><br><i>CEBPA mutation</i><br><i>poor prognosis</i>                                                                                         | <i>good prognosis</i><br><i>NPM1 mutation</i>                                                                                                             |
| response to stimulus                                                                      | 3.94E-03          | 18           | <i>CD34+CD38- fraction</i><br><i>FLT3 mutation</i><br><i>t(8;21)</i>                                                                                                   | <i>11q23</i><br><i>CD34+CD38+ fraction</i><br><i>inv(16)</i><br><i>MLL fusion gene</i><br><i>monocytic</i>                                                |
| negative regulation of cellular process                                                   | 5.51E-03          | 10           | <i>CD34+CD38- fraction</i><br><i>t(8;21)</i>                                                                                                                           | <i>CD34+CD38+ fraction</i><br><i>control</i><br><i>inv(16)</i><br><i>MLL fusion gene</i>                                                                  |
| ovulation                                                                                 | 7.13E-03          | 2            |                                                                                                                                                                        |                                                                                                                                                           |
| negative regulation of biological process                                                 | 8.35E-03          | 10           | <i>CD34+CD38- fraction</i><br><i>t(8;21)</i>                                                                                                                           | <i>CD34+CD38+ fraction</i><br><i>control</i><br><i>MLL fusion gene</i><br><i>inv(16)</i><br><i>MLL fusion gene</i>                                        |

**Molecular Functions**

|                                  |          |    |                                                                     |                                     |
|----------------------------------|----------|----|---------------------------------------------------------------------|-------------------------------------|
| sequence-specific DNA binding    | 2.59E-07 | 13 | <i>abnormal cytogenetics control</i>                                | <i>FLT3-ITD NPM1 mutation</i>       |
| transcription factor activity    | 3.02E-06 | 15 | <i>abnormal cytogenetics control MLL fusion gene</i>                | <i>good prognosis NPM1 mutation</i> |
| transcription regulator activity | 4.86E-05 | 16 | <i>abnormal cytogenetics control MLL fusion gene poor prognosis</i> | <i>good prognosis NPM1 mutation</i> |

### Cellular Components

|                              |          |    |                                           |                                                                                                                   |
|------------------------------|----------|----|-------------------------------------------|-------------------------------------------------------------------------------------------------------------------|
| plasma membrane part         | 6.53E-08 | 20 | <i>CEBPA mutation good prognosis</i>      | <i>11q23 CBF CEBPA silenced FAB-M4 FAB-M5 FAB-M7 inv(16) poor prognosis</i>                                       |
| plasma membrane              | 3.73E-06 | 23 | <i>CD34+CD38- fraction CEBPA mutation</i> | <i>11q23 CBF CD34+CD38+ fraction CEBPA silenced control FAB-M4 FAB-M5 FAB-M7 good prognosis inv(16) monocytic</i> |
| MHC class II protein complex | 7.87E-06 | 6  | <i>normal cytogenetics</i>                |                                                                                                                   |
| intrinsic to plasma membrane | 1.34E-03 | 11 | <i>CD34+CD38- fraction</i>                | <i>CBF CD34+CD38+ fraction FAB-M4 FAB-M5 FAB-M7 good prognosis inv(16) monocytic</i>                              |
| MHC protein complex          | 2.04E-03 | 6  |                                           |                                                                                                                   |
| intracellular part           | 3.44E-03 | 39 | <i>low centrosome aberrations</i>         | <i>abnormal cytogenetics FAB-M7 FLT3 mutation high centrosome aberrations</i>                                     |
| cell part                    | 4.93E-03 | 53 | <i>euploid</i>                            | <i>abnormal cytogenetics aneuploid FAB-M7 FLT3-ITD FLT3 mutation</i>                                              |
| cell                         | 4.94E-03 | 53 | <i>euploid</i>                            | <i>abnormal cytogenetics aneuploid FAB-M7 FLT3-ITD FLT3 mutation</i>                                              |

Significantly over-represented functional gene ontology (GO) categories of down-regulated genes associated with t(15;17) are presented here. GO categories that are also over-represented in up-regulated genes associated with t(15;17) are not included. Corrected p-value is the Bonferroni multiple hypothesis. Identification tags that are both up-regulated and down-regulated are not included in the 'other tags' columns. Identification tag descriptions can be found in Table S1.
