# Supplementary material for: Integrative Meta-Analysis of Differential Gene Expression in Acute Myeloid Leukemia
Source: PubMed Central journal article supplement (PMC2830886; doi:10.1371/journal.pone.0009466), 2010-03-01
Supplement: pone.0009466.s017.pdf [file pone.0009466.s017.pdf]

**Table S17. Functional categories of up-regulated genes associated with inv(16)**

| GO category                               | Corrected p-value | No. of genes | Other tags with upregulated genes                                                                                                                                            | Other tags with downregulated genes                                                                                          |
|-------------------------------------------|-------------------|--------------|------------------------------------------------------------------------------------------------------------------------------------------------------------------------------|------------------------------------------------------------------------------------------------------------------------------|
| <b>Biological Processes</b>               |                   |              |                                                                                                                                                                              |                                                                                                                              |
| response to external stimulus             | 4.34E-24          | 56           | <i>CD34+CD38+ fraction</i><br><i>good prognosis</i><br><i>MLL fusion gene</i><br><i>monocytic</i><br><i>normal cytogenetics</i><br><i>NPM1 mutation</i>                      | <i>CD34+CD38- fraction</i><br><i>control</i><br><i>del(7q)</i><br><i>poor prognosis</i><br><i>t(8;21)</i>                    |
| response to wounding                      | 5.77E-23          | 46           | <i>CD34+CD38+ fraction</i><br><i>good prognosis</i><br><i>MLL fusion gene</i><br><i>monocytic</i><br><i>normal cytogenetics</i><br><i>NPM1 mutation</i>                      | <i>CD34+CD38- fraction</i><br><i>control</i><br><i>poor prognosis</i><br><i>t(8;21)</i>                                      |
| response to stimulus                      | 4.17E-19          | 123          | <i>11q23</i><br><i>CD34+CD38+ fraction</i><br><i>MLL fusion gene</i><br><i>monocytic</i>                                                                                     | <i>CD34+CD38- fraction</i><br><i>FLT3 mutation</i><br><i>t(15;17)</i><br><i>t(8;21)</i>                                      |
| immune system process                     | 1.25E-16          | 69           | <i>CD34+CD38+ fraction</i><br><i>FAB-M4</i><br><i>FAB-M5</i><br><i>MLL fusion gene</i><br><i>monocytic</i>                                                                   | <i>CD34+CD38- fraction</i><br><i>FLT3 mutation</i><br><i>normal cytogenetics</i><br><i>t(15;17)</i><br><i>t(8;21)</i>        |
| cell communication                        | 2.65E-16          | 161          | <i>CD34+CD38+ fraction</i><br><i>CEBPA silenced</i><br><i>good prognosis</i><br><i>normal cytogenetics</i>                                                                   | <i>CD34+CD38- fraction</i><br><i>CEBPA mutation</i><br><i>poor prognosis</i><br><i>t(8;21)</i>                               |
| defense response                          | 8.93E-16          | 44           | <i>11q23</i><br><i>CD34+CD38+ fraction</i><br><i>good prognosis</i><br><i>MLL fusion gene</i><br><i>monocytic</i><br><i>normal cytogenetics</i>                              | <i>CD34+CD38- fraction</i><br><i>poor prognosis</i><br><i>t(8;21)</i>                                                        |
| inflammatory response                     | 9.13E-16          | 32           | <i>CD34+CD38+ fraction</i><br><i>MLL fusion gene</i><br><i>monocytic</i><br><i>NPM1 mutation</i>                                                                             | <i>CD34+CD38- fraction</i><br><i>t(8;21)</i>                                                                                 |
| organ development                         | 6.28E-15          | 60           | <i>CD34+CD38- fraction</i>                                                                                                                                                   | <i>CD34+CD38+ fraction</i><br><i>normal cytogenetics</i><br><i>t(8;21)</i>                                                   |
| positive regulation of biological process | 1.46E-14          | 58           | <i>aneuploid</i><br><i>CD34+CD38+ fraction</i><br><i>good prognosis</i><br><i>high centrosome aberrations</i>                                                                | <i>CD34+CD38- fraction</i><br><i>CEBPA mutation</i><br><i>euploid</i><br><i>low centrosome aberrations</i><br><i>t(8;21)</i> |
| response to stress                        | 3.86E-13          | 60           | <i>abnormal cytogenetics</i><br><i>aneuploid</i><br><i>CD34+CD38+ fraction</i><br><i>high centrosome aberrations</i><br><i>MLL fusion gene</i><br><i>normal cytogenetics</i> | <i>CD34+CD38- fraction</i><br><i>euploid</i><br><i>low centrosome aberrations</i><br><i>t(8;21)</i>                          |
| signal transduction                       | 4.23E-13          | 145          | <i>CD34+CD38+ fraction</i><br><i>good prognosis</i><br><i>normal cytogenetics</i>                                                                                            | <i>CD34+CD38- fraction</i><br><i>CEBPA mutation</i><br><i>FLT3 mutation</i><br><i>poor prognosis</i><br><i>t(8;21)</i>       |
| immune response                           | 1.26E-12          | 57           | <i>CD34+CD38+ fraction</i><br><i>FAB-M4</i><br><i>FAB-M5</i><br><i>monocytic</i>                                                                                             | <i>CD34+CD38- fraction</i><br><i>FLT3 mutation</i><br><i>normal cytogenetics</i><br><i>t(8;21)</i>                           |

|                                                |          |     |                                                                                                                             |                                                                                                                                   |
|------------------------------------------------|----------|-----|-----------------------------------------------------------------------------------------------------------------------------|-----------------------------------------------------------------------------------------------------------------------------------|
| positive regulation of cellular process        | 2.30E-12 | 52  | aneuploid<br>CD34+CD38+ fraction<br>good prognosis<br>high centrosome aberrations<br>MLL fusion gene<br>normal cytogenetics | CD34+CD38- fraction<br>euploid<br>low centrosome aberrations<br>t(8;21)                                                           |
| cell differentiation                           | 7.39E-11 | 70  | CD34+CD38+ fraction<br>CEBPA silenced<br>t(11;19)                                                                           | CD34+CD38- fraction<br>CEBPA mutation                                                                                             |
| cellular developmental process                 | 7.39E-11 | 70  | CD34+CD38+ fraction<br>CEBPA silenced<br>t(11;19)                                                                           | CD34+CD38- fraction<br>CEBPA mutation                                                                                             |
| biological adhesion                            | 5.40E-10 | 47  | CD34+CD38- fraction                                                                                                         | CD34+CD38+ fraction<br>normal cytogenetics<br>t(8;21)                                                                             |
| cell adhesion                                  | 5.40E-10 | 47  | CD34+CD38- fraction                                                                                                         | CD34+CD38+ fraction<br>normal cytogenetics<br>t(8;21)                                                                             |
| negative regulation of cellular process        | 1.37E-08 | 48  | CD34+CD38+ fraction<br>control<br>MLL fusion gene                                                                           | CD34+CD38- fraction<br>t(15;17)<br>t(8;21)                                                                                        |
| negative regulation of biological process      | 2.24E-08 | 49  | CD34+CD38+ fraction<br>control<br>MLL fusion gene                                                                           | CD34+CD38- fraction<br>t(15;17)<br>t(8;21)                                                                                        |
| cell activation                                | 3.87E-08 | 20  | good prognosis<br>NPM1 mutation                                                                                             | t(8;21)                                                                                                                           |
| leukocyte activation                           | 1.19E-07 | 18  |                                                                                                                             | FLT3 mutation<br>NPM1 mutation<br>t(8;21)                                                                                         |
| cell-cell signaling                            | 2.63E-07 | 33  |                                                                                                                             | t(8;21)                                                                                                                           |
| cellular process                               | 3.50E-07 | 352 | 11q23<br>abnormal cytogenetics<br>aneuploid<br>CEBPA silenced<br>high centrosome aberrations                                | CEBPA mutation<br>del(7q)<br>euploid<br>low centrosome aberrations<br>t(8;21)                                                     |
| regulation of biological process               | 4.22E-07 | 144 | aneuploid<br>CD34+CD38+ fraction<br>CEBPA silenced<br>high centrosome aberrations<br>MLL fusion gene                        | CD34+CD38- fraction<br>CEBPA mutation<br>del(7q)<br>euploid<br>FLT3 mutation<br>low centrosome aberrations<br>t(15;17)<br>t(8;21) |
| endocytosis                                    | 4.82E-07 | 18  | CD34+CD38+ fraction<br>MLL fusion gene                                                                                      | CD34+CD38- fraction<br>CEBPA mutation<br>t(8;21)                                                                                  |
| membrane invagination                          | 4.82E-07 | 18  | CD34+CD38+ fraction<br>MLL fusion gene                                                                                      | CD34+CD38- fraction<br>CEBPA mutation<br>t(8;21)                                                                                  |
| localization of cell                           | 5.13E-07 | 25  | CD34+CD38+ fraction<br>good prognosis<br>MLL fusion gene<br>NPM1 mutation                                                   | CD34+CD38- fraction<br>normal cytogenetics<br>poor prognosis<br>t(8;21)                                                           |
| cell motility                                  | 5.13E-07 | 25  | CD34+CD38+ fraction<br>good prognosis<br>MLL fusion gene<br>NPM1 mutation                                                   | CD34+CD38- fraction<br>normal cytogenetics<br>poor prognosis<br>t(8;21)                                                           |
| membrane organization and biogenesis           | 9.16E-07 | 21  | CD34+CD38+ fraction<br>MLL fusion gene                                                                                      | CD34+CD38- fraction<br>NPM1 mutation<br>poor prognosis<br>t(8;21)                                                                 |
| immune effector process                        | 1.59E-06 | 14  | NPM1 mutation                                                                                                               | t(8;21)                                                                                                                           |
| regulation of multicellular organismal process | 1.82E-06 | 22  | FAB-M7<br>good prognosis<br>NPM1 mutation                                                                                   | t(8;21)                                                                                                                           |

|                                               |          |     |                                                                                                                                                                  |                                                                                                                                                                         |
|-----------------------------------------------|----------|-----|------------------------------------------------------------------------------------------------------------------------------------------------------------------|-------------------------------------------------------------------------------------------------------------------------------------------------------------------------|
| regulation of cellular process                | 8.30E-06 | 134 | <i>aneuploid</i><br><i>CD34+CD38+ fraction</i><br><i>CEBPA silenced</i><br><i>good prognosis</i><br><i>high centrosome aberrations</i><br><i>MLL fusion gene</i> | <i>CD34+CD38- fraction</i><br><i>CEBPA mutation</i><br><i>euploid</i><br><i>FLT3 mutation</i><br><i>low centrosome aberrations</i><br><i>t(15;17)</i><br><i>t(8;21)</i> |
| regulation of immune system process           | 1.39E-05 | 15  | <i>good prognosis</i><br><i>NPM1 mutation</i>                                                                                                                    | <i>t(8;21)</i>                                                                                                                                                          |
| cell development                              | 1.61E-05 | 45  | <i>CD34+CD38+ fraction</i><br><i>normal cytogenetics</i>                                                                                                         | <i>CD34+CD38- fraction</i><br><i>CEBPA mutation</i><br><i>t(8;21)</i>                                                                                                   |
| regulation of developmental process           | 1.77E-05 | 35  | <i>CD34+CD38+ fraction</i><br><i>CEBPA silenced</i><br><i>good prognosis</i><br><i>MLL fusion gene</i>                                                           | <i>CD34+CD38- fraction</i><br><i>CEBPA mutation</i><br><i>t(8;21)</i>                                                                                                   |
| organ morphogenesis                           | 6.75E-05 | 21  | <i>good prognosis</i><br><i>normal cytogenetics</i><br><i>NPM1 mutation</i>                                                                                      | <i>poor prognosis</i><br><i>t(8;21)</i>                                                                                                                                 |
| myeloid leukocyte activation                  | 9.09E-05 | 7   |                                                                                                                                                                  |                                                                                                                                                                         |
| vesicle-mediated transport                    | 9.70E-05 | 28  | <i>MLL fusion gene</i>                                                                                                                                           | <i>poor prognosis</i><br><i>t(8;21)</i>                                                                                                                                 |
| humoral immune response                       | 1.00E-04 | 10  | <i>NPM1 mutation</i>                                                                                                                                             | <i>t(8;21)</i>                                                                                                                                                          |
| response to chemical stimulus                 | 1.70E-04 | 27  | <i>CD34+CD38+ fraction</i><br><i>good prognosis</i><br><i>normal cytogenetics</i><br><i>NPM1 mutation</i>                                                        | <i>11q23</i><br><i>CD34+CD38- fraction</i><br><i>poor prognosis</i><br><i>t(8;21)</i>                                                                                   |
| positive regulation of developmental process  | 1.80E-04 | 20  | <i>good prognosis</i><br><i>MLL fusion gene</i>                                                                                                                  | <i>poor prognosis</i><br><i>t(8;21)</i>                                                                                                                                 |
| leukocyte mediated immunity                   | 2.30E-04 | 10  | <i>good prognosis</i><br><i>normal cytogenetics</i><br><i>NPM1 mutation</i>                                                                                      | <i>t(8;21)</i>                                                                                                                                                          |
| lymphocyte activation                         | 3.10E-04 | 13  |                                                                                                                                                                  | <i>FLT3 mutation</i><br><i>t(8;21)</i>                                                                                                                                  |
| locomotory behavior                           | 3.50E-04 | 14  | <i>CD34+CD38+ fraction</i><br><i>NPM1 mutation</i>                                                                                                               | <i>11q23</i><br><i>CD34+CD38- fraction</i><br><i>control</i><br><i>t(8;21)</i>                                                                                          |
| skeletal development                          | 4.00E-04 | 15  |                                                                                                                                                                  | <i>t(8;21)</i>                                                                                                                                                          |
| regulation of cell activation                 | 5.10E-04 | 10  | <i>good prognosis</i><br><i>NPM1 mutation</i>                                                                                                                    | <i>t(8;21)</i>                                                                                                                                                          |
| regulation of leukocyte activation            | 5.10E-04 | 10  | <i>good prognosis</i><br><i>NPM1 mutation</i>                                                                                                                    | <i>t(8;21)</i>                                                                                                                                                          |
| positive regulation of metabolic process      | 6.10E-04 | 21  | <i>good prognosis</i><br><i>high centrosome aberrations</i>                                                                                                      | <i>low centrosome aberrations</i><br><i>poor prognosis</i>                                                                                                              |
| transcription from RNA polymerase II promoter | 6.30E-04 | 27  | <i>abnormal cytogenetics</i><br><i>good prognosis</i><br><i>NPM1 mutation</i>                                                                                    | <i>del(7q)</i><br><i>MLL fusion gene</i><br><i>poor prognosis</i><br><i>t(8;21)</i>                                                                                     |
| blood vessel development                      | 6.50E-04 | 13  | <i>good prognosis</i><br><i>NPM1 mutation</i>                                                                                                                    | <i>MLL fusion gene</i><br><i>t(8;21)</i>                                                                                                                                |
| tissue development                            | 6.70E-04 | 18  |                                                                                                                                                                  | <i>t(8;21)</i>                                                                                                                                                          |
| cytokine production                           | 7.90E-04 | 11  | <i>CD34+CD38+ fraction</i><br><i>FAB-M4</i><br><i>FAB-M5</i><br><i>good prognosis</i><br><i>NPM1 mutation</i>                                                    | <i>CD34+CD38- fraction</i><br><i>t(8;21)</i>                                                                                                                            |
| vasculature development                       | 8.00E-04 | 13  | <i>good prognosis</i><br><i>NPM1 mutation</i>                                                                                                                    | <i>MLL fusion gene</i><br><i>t(8;21)</i>                                                                                                                                |
| wound healing                                 | 9.50E-04 | 12  | <i>NPM1 mutation</i>                                                                                                                                             | <i>t(8;21)</i>                                                                                                                                                          |
| taxis                                         | 1.10E-03 | 12  | <i>CD34+CD38+ fraction</i><br><i>MLL fusion gene</i><br><i>NPM1 mutation</i>                                                                                     | <i>CD34+CD38- fraction</i><br><i>control</i>                                                                                                                            |
| chemotaxis                                    | 1.10E-03 | 12  | <i>CD34+CD38+ fraction</i><br><i>MLL fusion gene</i><br><i>NPM1 mutation</i>                                                                                     | <i>CD34+CD38- fraction</i><br><i>control</i>                                                                                                                            |

|                                                                                              |          |     |                                                                                    |                                                                       |
|----------------------------------------------------------------------------------------------|----------|-----|------------------------------------------------------------------------------------|-----------------------------------------------------------------------|
| positive regulation of nucleobase, nucleoside, nucleotide and nucleic acid metabolic process | 1.26E-03 | 17  | <i>good prognosis</i><br><i>high centrosome aberrations</i>                        | <i>low centrosome aberrations</i><br><i>poor prognosis</i>            |
| blood vessel morphogenesis                                                                   | 1.27E-03 | 12  |                                                                                    | <i>t(8;21)</i>                                                        |
| positive regulation of cellular metabolic process                                            | 1.51E-03 | 20  | <i>good prognosis</i><br><i>high centrosome aberrations</i>                        | <i>low centrosome aberrations</i>                                     |
| intracellular signaling cascade                                                              | 1.72E-03 | 56  | <i>good prognosis</i><br><i>MLL fusion gene</i><br><i>NPM1 mutation</i>            | <i>poor prognosis</i><br><i>t(8;21)</i>                               |
| anatomical structure formation                                                               | 1.94E-03 | 12  |                                                                                    | <i>t(8;21)</i>                                                        |
| immune system development                                                                    | 1.99E-03 | 13  | <i>good prognosis</i>                                                              | <i>poor prognosis</i>                                                 |
| positive regulation of immune system process                                                 | 2.27E-03 | 11  | <i>good prognosis</i><br><i>NPM1 mutation</i>                                      | <i>t(8;21)</i>                                                        |
| positive regulation of multicellular organismal process                                      | 2.38E-03 | 12  | <i>NPM1 mutation</i>                                                               | <i>t(8;21)</i>                                                        |
| response to mechanical stimulus                                                              | 2.67E-03 | 5   |                                                                                    | <i>t(8;21)</i>                                                        |
| hemopoiesis                                                                                  | 3.10E-03 | 12  | <i>good prognosis</i>                                                              | <i>NPM1 mutation</i><br><i>poor prognosis</i>                         |
| production of molecular mediator of immune response                                          | 3.12E-03 | 6   | <i>NPM1 mutation</i>                                                               | <i>t(8;21)</i>                                                        |
| cell death                                                                                   | 3.27E-03 | 32  | <i>CD34+CD38+ fraction</i><br><i>MLL fusion gene</i><br><i>normal cytogenetics</i> | <i>CD34+CD38- fraction</i><br><i>CEBPA mutation</i><br><i>t(8;21)</i> |
| death                                                                                        | 3.27E-03 | 32  | <i>CD34+CD38+ fraction</i><br><i>MLL fusion gene</i><br><i>normal cytogenetics</i> | <i>CD34+CD38- fraction</i><br><i>CEBPA mutation</i><br><i>t(8;21)</i> |
| negative regulation of cell proliferation                                                    | 5.14E-03 | 14  | <i>aneuploid</i>                                                                   | <i>euploid</i><br><i>t(8;21)</i>                                      |
| behavior                                                                                     | 5.55E-03 | 16  | <i>CD34+CD38+ fraction</i><br><i>NPM1 mutation</i>                                 | <i>CD34+CD38- fraction</i>                                            |
| hemostasis                                                                                   | 6.33E-03 | 10  | <i>NPM1 mutation</i>                                                               | <i>t(8;21)</i>                                                        |
| localization                                                                                 | 6.43E-03 | 103 | <i>FAB-M7</i><br><i>good prognosis</i><br><i>MLL fusion gene</i>                   | <i>poor prognosis</i><br><i>t(8;21)</i>                               |
| hemopoietic or lymphoid organ development                                                    | 6.53E-03 | 12  | <i>good prognosis</i>                                                              | <i>NPM1 mutation</i><br><i>poor prognosis</i>                         |
| positive regulation of cell proliferation                                                    | 6.58E-03 | 14  | <i>MLL fusion gene</i><br><i>NPM1 mutation</i>                                     | <i>poor prognosis</i><br><i>t(8;21)</i>                               |
| T cell activation                                                                            | 8.53E-03 | 9   | <i>good prognosis</i>                                                              |                                                                       |
| regulation of MAP kinase activity                                                            | 9.28E-03 | 9   |                                                                                    |                                                                       |
| regulation of mast cell cytokine production                                                  | 9.75E-03 | 3   | <i>good prognosis</i><br><i>normal cytogenetics</i>                                | <i>t(8;21)</i>                                                        |
| mast cell cytokine production                                                                | 9.75E-03 | 3   | <i>good prognosis</i><br><i>normal cytogenetics</i>                                | <i>t(8;21)</i>                                                        |

#### Molecular Functions

|                                  |          |     |                                                                                                       |                                                                |
|----------------------------------|----------|-----|-------------------------------------------------------------------------------------------------------|----------------------------------------------------------------|
| signal transducer activity       | 2.14E-08 | 102 | <i>CD34+CD38+ fraction</i><br><i>FAB-M4</i><br><i>FAB-M5</i><br><i>normal cytogenetics</i>            | <i>CD34+CD38- fraction</i><br><i>t(8;21)</i>                   |
| molecular transducer activity    | 2.14E-08 | 102 | <i>CD34+CD38+ fraction</i><br><i>FAB-M4</i><br><i>FAB-M5</i><br><i>normal cytogenetics</i>            | <i>CD34+CD38- fraction</i><br><i>t(8;21)</i>                   |
| binding                          | 2.00E-05 | 362 | <i>aneuploid</i><br><i>CD34+CD38+ fraction</i><br><i>good prognosis</i><br><i>normal cytogenetics</i> | <i>CD34+CD38- fraction</i><br><i>euploid</i><br><i>t(8;21)</i> |
| receptor binding                 | 2.20E-04 | 37  | <i>11q23</i><br><i>NPM1 mutation</i>                                                                  | <i>t(8;21)</i>                                                 |
| sugar binding                    | 5.90E-04 | 16  | <i>CD34+CD38+ fraction</i>                                                                            | <i>CD34+CD38- fraction</i>                                     |
| protein complex binding          | 7.70E-04 | 10  |                                                                                                       | <i>t(8;21)</i>                                                 |
| transcription activator activity | 1.04E-03 | 17  | <i>good prognosis</i><br><i>NPM1 mutation</i>                                                         | <i>poor prognosis</i><br><i>t(8;21)</i>                        |
| calcium ion binding              | 1.87E-03 | 43  | <i>t(15;17)</i>                                                                                       |                                                                |
| receptor activity                | 4.30E-03 | 73  | <i>CD34+CD38+ fraction</i><br><i>FAB-M4</i><br><i>FAB-M5</i>                                          | <i>CD34+CD38- fraction</i><br><i>t(8;21)</i>                   |

transcription coactivator activity 6.17E-03 12 *good prognosis* *poor prognosis*  
*t(8;21)*

### Cellular Components

|                              |          |     |                                                                                                                                             |                                                                                  |
|------------------------------|----------|-----|---------------------------------------------------------------------------------------------------------------------------------------------|----------------------------------------------------------------------------------|
| plasma membrane              | 5.04E-26 | 144 | 11q23<br>CBF<br>CD34+CD38+ fraction<br>CEBPA silenced<br>control<br>FAB-M4<br>FAB-M5<br>FAB-M7<br><i>good prognosis</i><br><i>monocytic</i> | CD34+CD38- fraction<br>CEBPA mutation<br><i>t(15;17)</i>                         |
| integral to plasma membrane  | 1.87E-23 | 77  | CBF<br>CD34+CD38+ fraction<br>FAB-M4<br>FAB-M5<br>FAB-M7<br><i>good prognosis</i><br><i>monocytic</i>                                       | CD34+CD38- fraction                                                              |
| intrinsic to plasma membrane | 3.95E-23 | 77  | CBF<br>CD34+CD38+ fraction<br>FAB-M4<br>FAB-M5<br>FAB-M7<br><i>good prognosis</i><br><i>monocytic</i>                                       | CD34+CD38- fraction<br><i>t(15;17)</i>                                           |
| membrane                     | 2.89E-20 | 245 | FLT3 mutation<br>MLL fusion gene                                                                                                            | <i>normal cytogenetics</i><br><i>t(8;21)</i>                                     |
| plasma membrane part         | 1.42E-19 | 96  | 11q23<br>CBF<br>CEBPA silenced<br>FAB-M4<br>FAB-M5<br>FAB-M7<br><i>poor prognosis</i>                                                       | CEBPA mutation<br><i>good prognosis</i><br><i>t(15;17)</i>                       |
| membrane part                | 2.50E-16 | 200 | CEBPA silenced<br>FAB-M4<br>FAB-M5<br>MLL fusion gene                                                                                       | CEBPA mutation<br><i>normal cytogenetics</i><br><i>t(8;21)</i>                   |
| intrinsic to membrane        | 5.79E-16 | 182 | CEBPA silenced<br>FAB-M4<br>FAB-M5<br>MLL fusion gene                                                                                       | <i>t(8;21)</i>                                                                   |
| integral to membrane         | 3.27E-15 | 178 | CEBPA silenced<br>FAB-M4<br>FAB-M5<br>MLL fusion gene                                                                                       | <i>t(8;21)</i>                                                                   |
| extracellular region         | 4.96E-09 | 77  | 11q23<br>CD34+CD38+ fraction<br>NPM1 mutation<br><i>t(15;17)</i>                                                                            | CD34+CD38- fraction<br><i>t(8;21)</i>                                            |
| membrane fraction            | 3.09E-06 | 31  | FAB-M7<br>MLL fusion gene<br><i>normal cytogenetics</i>                                                                                     | <i>del(7q)</i><br><i>t(8;21)</i>                                                 |
| Golgi apparatus              | 1.18E-05 | 31  | <i>good prognosis</i><br>MLL fusion gene                                                                                                    | <i>poor prognosis</i><br><i>t(8;21)</i>                                          |
| vacuole                      | 4.52E-05 | 16  | CD34+CD38+ fraction<br>CEBPA mutation<br>FAB-M4<br>FAB-M5<br><i>good prognosis</i><br>MLL fusion gene<br><i>monocytic</i>                   | CD34+CD38- fraction<br>CEBPA silenced<br><i>poor prognosis</i><br><i>t(8;21)</i> |
| melanosome                   | 4.71E-05 | 10  |                                                                                                                                             | NRAS-PM<br><i>t(8;21)</i>                                                        |
| pigment granule              | 4.71E-05 | 10  |                                                                                                                                             | NRAS-PM<br><i>t(8;21)</i>                                                        |

|                                    |          |     |                                                                                                             |                                                                    |
|------------------------------------|----------|-----|-------------------------------------------------------------------------------------------------------------|--------------------------------------------------------------------|
| extracellular region part          | 9.37E-05 | 34  | 11q23<br>CD34+CD38+ fraction<br>FLT3 mutation<br>NPM1 mutation                                              | CD34+CD38- fraction<br>t(8;21)                                     |
| extracellular space                | 1.70E-04 | 24  | 11q23<br>CD34+CD38+ fraction<br>FLT3 mutation<br>NPM1 mutation                                              | CD34+CD38- fraction<br>t(8;21)                                     |
| lysosome                           | 2.00E-04 | 14  | CD34+CD38+ fraction<br>CEBPA mutation<br>FAB-M4<br>FAB-M5<br>good prognosis<br>MLL fusion gene<br>monocytic | CD34+CD38- fraction<br>CEBPA silenced<br>poor prognosis<br>t(8;21) |
| lytic vacuole                      | 2.40E-04 | 14  | CD34+CD38+ fraction<br>CEBPA mutation<br>FAB-M4<br>FAB-M5<br>good prognosis<br>MLL fusion gene<br>monocytic | CD34+CD38- fraction<br>CEBPA silenced<br>poor prognosis<br>t(8;21) |
| cytoplasmic part                   | 3.20E-04 | 105 | abnormal cytogenetics<br>FAB-M7<br>MLL fusion gene                                                          | FLT3-ITD<br>normal cytogenetics<br>NPM1 mutation<br>t(8;21)        |
| Golgi membrane                     | 4.50E-04 | 19  |                                                                                                             | poor prognosis<br>t(8;21)                                          |
| cytoplasmic vesicle                | 9.70E-04 | 20  | MLL fusion gene                                                                                             | t(8;21)                                                            |
| Golgi apparatus part               | 9.70E-04 | 20  | MLL fusion gene                                                                                             | poor prognosis<br>t(8;21)                                          |
| vesicle                            | 1.26E-03 | 20  | MLL fusion gene                                                                                             | t(8;21)                                                            |
| endomembrane system                | 1.96E-03 | 34  | CEBPA silenced<br>good prognosis<br>MLL fusion gene<br>NPM1 mutation                                        | CEBPA mutation<br>poor prognosis<br>t(8;21)                        |
| integrin complex                   | 1.98E-03 | 7   |                                                                                                             | t(8;21)                                                            |
| receptor complex                   | 4.54E-03 | 9   | MLL fusion gene                                                                                             | t(8;21)                                                            |
| lipid raft                         | 7.20E-03 | 6   |                                                                                                             | t(8;21)                                                            |
| cytoplasmic membrane-bound vesicle | 8.20E-03 | 16  | MLL fusion gene                                                                                             | t(8;21)                                                            |
| membrane-bound vesicle             | 9.69E-03 | 16  | MLL fusion gene                                                                                             | t(8;21)                                                            |

Significantly over-represented functional gene ontology (GO) categories of up-regulated genes associated with inv(16) are presented here. GO categories that are also over-represented in down-regulated genes associated with inv(16) are not included. Corrected p-value is the Bonferroni multiple hypothesis. Identification tags that are both up-regulated and down-regulated are not included in the 'other tags' columns. Identification tag descriptions can be found in Table S1.
