# Supplementary material for: Integrative Meta-Analysis of Differential Gene Expression in Acute Myeloid Leukemia
Source: PubMed Central journal article supplement (PMC2830886; doi:10.1371/journal.pone.0009466), 2010-03-01
Supplement: pone.0009466.s018.pdf [file pone.0009466.s018.pdf]

**Table S18. Functional categories of down-regulated genes associated with inv(16)**

| GO category                       | Corrected p-value | No. of genes | Other tags with downregulated genes                                         | Other tags with upregulated genes                   |
|-----------------------------------|-------------------|--------------|-----------------------------------------------------------------------------|-----------------------------------------------------|
| <b>Biological Processes</b>       |                   |              |                                                                             |                                                     |
| nervous system development        | 4.70E-04          | 19           | <i>CD34+CD38+ fraction</i><br><i>NPM1 mutation</i><br><i>poor prognosis</i> | <i>CD34+CD38- fraction</i><br><i>good prognosis</i> |
| <b>Molecular Functions - none</b> |                   |              |                                                                             |                                                     |
| <b>Cellular Components - none</b> |                   |              |                                                                             |                                                     |

Significantly over-represented functional gene ontology (GO) categories of down-regulated genes associated with inv(16) are presented here. GO categories that are also over-represented in up-regulated genes associated with inv(16) are not included. Corrected p-value is the Bonferroni multiple hypothesis. Identification tags that are both up-regulated and down-regulated are not included in the 'other tags' columns. Identification tag descriptions can be found in Table S1.
