# Supplementary material for: Integrative Meta-Analysis of Differential Gene Expression in Acute Myeloid Leukemia
Source: PubMed Central journal article supplement (PMC2830886; doi:10.1371/journal.pone.0009466), 2010-03-01
Supplement: pone.0009466.s019.pdf [file pone.0009466.s019.pdf]

**Table S19. Functional categories of up-regulated genes associated with t(8;21)**

| GO category                        | Corrected p-value | No. of genes | Other tags with upregulated genes | Other tags with downregulated genes |
|------------------------------------|-------------------|--------------|-----------------------------------|-------------------------------------|
| <b>Biological Processes - none</b> |                   |              |                                   |                                     |
| <b>Molecular Functions - none</b>  |                   |              |                                   |                                     |
| <b>Cellular Components</b>         |                   |              |                                   |                                     |
| centrosome                         | 6.43E-03          | 7            | <i>aneuploid</i>                  | <i>euploid</i>                      |

Significantly over-represented functional gene ontology (GO) categories of up-regulated genes associated with t(8;21) are presented here. GO categories that are also over-represented in down-regulated genes associated with t(8;21) are not included. Corrected p-value is the Bonferroni multiple hypothesis. Identification tags that are both up-regulated and down-regulated are not included in the 'other tags' columns. Identification tag descriptions can be found in Table S1.
