# Supplementary material for: Integrative Meta-Analysis of Differential Gene Expression in Acute Myeloid Leukemia
Source: PubMed Central journal article supplement (PMC2830886; doi:10.1371/journal.pone.0009466), 2010-03-01
Supplement: pone.0009466.s020.pdf [file pone.0009466.s020.pdf]

**Table S20. Functional categories of down-regulated genes associated with t(8;21)**

| GO category                          | Corrected p-value | No. of genes | Other tags with downregulated genes                                                                                                                     | Other tags with upregulated genes                                                                                                                                         |
|--------------------------------------|-------------------|--------------|---------------------------------------------------------------------------------------------------------------------------------------------------------|---------------------------------------------------------------------------------------------------------------------------------------------------------------------------|
| <b>Biological Processes</b>          |                   |              |                                                                                                                                                         |                                                                                                                                                                           |
| developmental process                | 1.56E-27          | 133          | <i>CEBPA mutation control</i>                                                                                                                           | 11q23<br><i>CEBPA silenced</i><br><i>FAB-M7</i><br><i>FLT3-ITD</i><br><i>FLT3 mutation</i><br><i>t(11;19)</i>                                                             |
| multicellular organismal process     | 3.36E-24          | 137          | <i>CEBPA mutation control</i><br><i>del(7q)</i>                                                                                                         | 11q23<br><i>FAB-M4</i><br><i>FAB-M5</i><br><i>FAB-M7</i><br><i>FLT3-ITD</i><br><i>FLT3 mutation</i><br><i>good prognosis</i>                                              |
| response to external stimulus        | 3.48E-22          | 53           | <i>CD34+CD38- fraction control</i><br><i>del(7q)</i><br><i>poor prognosis</i>                                                                           | <i>CD34+CD38+ fraction</i><br><i>good prognosis</i><br><i>inv(16)</i><br><i>MLL fusion gene</i><br><i>monocytic</i><br><i>normal cytogenetics</i><br><i>NPM1 mutation</i> |
| multicellular organismal development | 2.77E-21          | 100          | <i>CD34+CD38+ fraction</i><br><i>CEBPA mutation control</i>                                                                                             | 11q23<br><i>CD34+CD38- fraction</i><br><i>FAB-M7</i><br><i>FLT3-ITD</i>                                                                                                   |
| response to wounding                 | 1.06E-20          | 43           | <i>CD34+CD38- fraction control</i><br><i>poor prognosis</i>                                                                                             | <i>CD34+CD38+ fraction</i><br><i>good prognosis</i><br><i>inv(16)</i><br><i>MLL fusion gene</i><br><i>monocytic</i><br><i>normal cytogenetics</i><br><i>NPM1 mutation</i> |
| system development                   | 3.83E-17          | 75           | <i>CD34+CD38+ fraction</i>                                                                                                                              | <i>CD34+CD38- fraction</i><br><i>t(15;17)</i>                                                                                                                             |
| cell communication                   | 4.07E-16          | 157          | <i>CD34+CD38- fraction</i><br><i>CEBPA mutation</i><br><i>poor prognosis</i>                                                                            | <i>CD34+CD38+ fraction</i><br><i>CEBPA silenced</i><br><i>good prognosis</i><br><i>inv(16)</i><br><i>normal cytogenetics</i>                                              |
| response to stimulus                 | 1.36E-14          | 111          | <i>CD34+CD38- fraction</i><br><i>FLT3 mutation</i><br><i>t(15;17)</i>                                                                                   | 11q23<br><i>CD34+CD38+ fraction</i><br><i>inv(16)</i><br><i>MLL fusion gene</i><br><i>monocytic</i>                                                                       |
| signal transduction                  | 2.33E-14          | 145          | <i>CD34+CD38- fraction</i><br><i>CEBPA mutation</i><br><i>FLT3 mutation</i><br><i>poor prognosis</i>                                                    | <i>CD34+CD38+ fraction</i><br><i>good prognosis</i><br><i>inv(16)</i><br><i>normal cytogenetics</i>                                                                       |
| organ development                    | 2.60E-14          | 58           | <i>CD34+CD38+ fraction</i><br><i>normal cytogenetics</i>                                                                                                | <i>CD34+CD38- fraction</i><br><i>inv(16)</i>                                                                                                                              |
| biological regulation                | 1.18E-13          | 172          | <i>CD34+CD38- fraction</i><br><i>CEBPA mutation control</i><br><i>del(7q)</i><br><i>euploid</i><br><i>low centrosome aberrations</i><br><i>t(15;17)</i> | <i>aneuploid</i><br><i>CD34+CD38+ fraction</i><br><i>CEBPA silenced</i><br><i>high centrosome aberrations</i><br><i>normal cytogenetics</i>                               |
| cell proliferation                   | 1.94E-13          | 45           | <i>CD34+CD38- fraction</i><br><i>euploid</i><br><i>normal cytogenetics</i>                                                                              | <i>aneuploid</i><br><i>CD34+CD38+ fraction</i><br><i>FLT3-ITD</i><br><i>FLT3 mutation</i>                                                                                 |

|                                           |          |     |                                                                                                                        |                                                                                                                                               |
|-------------------------------------------|----------|-----|------------------------------------------------------------------------------------------------------------------------|-----------------------------------------------------------------------------------------------------------------------------------------------|
| positive regulation of biological process | 2.69E-13 | 55  | CD34+CD38- fraction<br>CEBPA mutation<br>euploid<br>low centrosome aberrations                                         | aneuploid<br>CD34+CD38+ fraction<br>good prognosis<br>high centrosome aberrations<br>inv(16)                                                  |
| defense response                          | 1.75E-12 | 39  | CD34+CD38- fraction<br>poor prognosis                                                                                  | 11q23<br>CD34+CD38+ fraction<br>good prognosis<br>inv(16)<br>MLL fusion gene<br>monocytic<br>normal cytogenetics                              |
| inflammatory response                     | 2.00E-12 | 28  | CD34+CD38- fraction                                                                                                    | CD34+CD38+ fraction<br>inv(16)<br>MLL fusion gene<br>monocytic<br>NPM1 mutation                                                               |
| response to stress                        | 5.22E-12 | 57  | CD34+CD38- fraction<br>euploid<br>low centrosome aberrations                                                           | abnormal cytogenetics<br>aneuploid<br>CD34+CD38+ fraction<br>high centrosome aberrations<br>inv(16)<br>MLL fusion gene<br>normal cytogenetics |
| positive regulation of cellular process   | 4.44E-11 | 49  | CD34+CD38- fraction<br>euploid<br>low centrosome aberrations                                                           | aneuploid<br>CD34+CD38+ fraction<br>good prognosis<br>high centrosome aberrations<br>inv(16)<br>MLL fusion gene<br>normal cytogenetics        |
| immune system process                     | 6.18E-11 | 58  | CD34+CD38- fraction<br>FLT3 mutation<br>normal cytogenetics<br>t(15;17)                                                | CD34+CD38+ fraction<br>FAB-M4<br>FAB-M5<br>inv(16)<br>MLL fusion gene<br>monocytic                                                            |
| regulation of biological process          | 1.05E-09 | 149 | CD34+CD38- fraction<br>CEBPA mutation<br>del(7q)<br>euploid<br>FLT3 mutation<br>low centrosome aberrations<br>t(15;17) | aneuploid<br>CD34+CD38+ fraction<br>CEBPA silenced<br>high centrosome aberrations<br>inv(16)<br>MLL fusion gene                               |
| cellular process                          | 1.14E-09 | 351 | CEBPA mutation<br>del(7q)<br>euploid<br>low centrosome aberrations                                                     | 11q23<br>abnormal cytogenetics<br>aneuploid<br>CEBPA silenced<br>high centrosome aberrations<br>inv(16)                                       |
| negative regulation of cellular process   | 1.30E-09 | 49  | CD34+CD38- fraction<br>t(15;17)                                                                                        | CD34+CD38+ fraction<br>control<br>inv(16)<br>MLL fusion gene                                                                                  |
| negative regulation of biological process | 2.17E-09 | 50  | CD34+CD38- fraction<br>t(15;17)                                                                                        | CD34+CD38+ fraction<br>control<br>inv(16)<br>MLL fusion gene                                                                                  |
| biological adhesion                       | 2.61E-09 | 45  | CD34+CD38+ fraction<br>normal cytogenetics                                                                             | CD34+CD38- fraction<br>inv(16)                                                                                                                |
| cell adhesion                             | 2.61E-09 | 45  | CD34+CD38+ fraction<br>normal cytogenetics                                                                             | CD34+CD38- fraction<br>inv(16)                                                                                                                |
| regulation of cell proliferation          | 2.56E-08 | 29  | CD34+CD38+ fraction<br>euploid<br>poor prognosis                                                                       | aneuploid<br>CD34+CD38- fraction<br>good prognosis<br>MLL fusion gene<br>NPM1 mutation                                                        |

|                                                         |          |     |                                                                                                             |                                                                                                                                   |
|---------------------------------------------------------|----------|-----|-------------------------------------------------------------------------------------------------------------|-----------------------------------------------------------------------------------------------------------------------------------|
| regulation of multicellular organismal process          | 3.05E-08 | 24  |                                                                                                             | FAB-M7<br>good prognosis<br>inv(16)<br>NPM1 mutation                                                                              |
| immune response                                         | 3.57E-08 | 48  | CD34+CD38- fraction<br>FLT3 mutation<br>normal cytogenetics                                                 | CD34+CD38+ fraction<br>FAB-M4<br>FAB-M5<br>inv(16)<br>monocytic                                                                   |
| localization of cell                                    | 5.12E-08 | 26  | CD34+CD38- fraction<br>normal cytogenetics<br>poor prognosis                                                | CD34+CD38+ fraction<br>good prognosis<br>inv(16)<br>MLL fusion gene<br>NPM1 mutation                                              |
| cell motility                                           | 5.12E-08 | 26  | CD34+CD38- fraction<br>normal cytogenetics<br>poor prognosis                                                | CD34+CD38+ fraction<br>good prognosis<br>inv(16)<br>MLL fusion gene<br>NPM1 mutation                                              |
| immune effector process                                 | 1.03E-07 | 15  |                                                                                                             | inv(16)<br>NPM1 mutation                                                                                                          |
| regulation of cellular process                          | 1.33E-07 | 137 | CD34+CD38- fraction<br>CEBPA mutation<br>euploid<br>FLT3 mutation<br>low centrosome aberrations<br>t(15;17) | aneuploid<br>CD34+CD38+ fraction<br>CEBPA silenced<br>good prognosis<br>high centrosome aberrations<br>inv(16)<br>MLL fusion gene |
| anatomical structure morphogenesis                      | 2.12E-07 | 39  | poor prognosis<br>t(15;17)                                                                                  | FLT3-ITD<br>FLT3 mutation<br>good prognosis<br>MLL fusion gene<br>normal cytogenetics                                             |
| regulation of immune system process                     | 1.17E-06 | 16  |                                                                                                             | good prognosis<br>inv(16)<br>NPM1 mutation                                                                                        |
| regulation of developmental process                     | 2.42E-06 | 36  | CD34+CD38- fraction<br>CEBPA mutation                                                                       | CD34+CD38+ fraction<br>CEBPA silenced<br>good prognosis<br>inv(16)<br>MLL fusion gene                                             |
| cell development                                        | 6.39E-06 | 45  | CD34+CD38- fraction<br>CEBPA mutation                                                                       | CD34+CD38+ fraction<br>inv(16)<br>normal cytogenetics                                                                             |
| cell activation                                         | 8.32E-06 | 17  |                                                                                                             | good prognosis<br>inv(16)<br>NPM1 mutation                                                                                        |
| endocytosis                                             | 1.54E-05 | 16  | CD34+CD38- fraction<br>CEBPA mutation                                                                       | CD34+CD38+ fraction<br>inv(16)<br>MLL fusion gene                                                                                 |
| membrane invagination                                   | 1.54E-05 | 16  | CD34+CD38- fraction<br>CEBPA mutation                                                                       | CD34+CD38+ fraction<br>inv(16)<br>MLL fusion gene                                                                                 |
| leukocyte mediated immunity                             | 1.60E-05 | 11  |                                                                                                             | good prognosis<br>inv(16)<br>normal cytogenetics<br>NPM1 mutation                                                                 |
| positive regulation of developmental process            | 2.38E-05 | 21  | poor prognosis                                                                                              | good prognosis<br>inv(16)<br>MLL fusion gene                                                                                      |
| cell-cell signaling                                     | 2.77E-05 | 29  |                                                                                                             | inv(16)                                                                                                                           |
| positive regulation of immune system process            | 2.79E-05 | 13  |                                                                                                             | good prognosis<br>inv(16)<br>NPM1 mutation                                                                                        |
| leukocyte activation                                    | 3.26E-05 | 15  | FLT3 mutation<br>NPM1 mutation                                                                              | inv(16)                                                                                                                           |
| positive regulation of multicellular organismal process | 3.65E-05 | 14  |                                                                                                             | inv(16)<br>NPM1 mutation                                                                                                          |

|                                                                                                                           |          |    |                                                                             |                                                                                                        |
|---------------------------------------------------------------------------------------------------------------------------|----------|----|-----------------------------------------------------------------------------|--------------------------------------------------------------------------------------------------------|
| organ morphogenesis                                                                                                       | 4.03E-05 | 21 | <i>poor prognosis</i>                                                       | <i>good prognosis</i><br><i>inv(16)</i><br><i>normal cytogenetics</i><br><i>NPM1 mutation</i>          |
| humoral immune response                                                                                                   | 7.58E-05 | 10 |                                                                             | <i>inv(16)</i><br><i>NPM1 mutation</i>                                                                 |
| membrane organization and biogenesis                                                                                      | 9.41E-05 | 18 | <i>CD34+CD38- fraction</i><br><i>NPM1 mutation</i><br><i>poor prognosis</i> | <i>CD34+CD38+ fraction</i><br><i>inv(16)</i><br><i>MLL fusion gene</i>                                 |
| wound healing                                                                                                             | 9.52E-05 | 13 |                                                                             | <i>inv(16)</i><br><i>NPM1 mutation</i>                                                                 |
| transcription from RNA polymerase II promoter                                                                             | 1.00E-04 | 28 | <i>del(7q)</i><br><i>MLL fusion gene</i><br><i>poor prognosis</i>           | <i>abnormal cytogenetics</i><br><i>good prognosis</i><br><i>inv(16)</i><br><i>NPM1 mutation</i>        |
| regulation of biological quality                                                                                          | 1.90E-04 | 39 | <i>poor prognosis</i>                                                       | <i>FAB-M7</i><br><i>good prognosis</i><br><i>MLL fusion gene</i><br><i>t(8;14)</i>                     |
| activation of immune response                                                                                             | 4.00E-04 | 9  |                                                                             | <i>NPM1 mutation</i>                                                                                   |
| blood vessel development                                                                                                  | 4.60E-04 | 13 | <i>MLL fusion gene</i>                                                      | <i>good prognosis</i><br><i>inv(16)</i><br><i>NPM1 mutation</i>                                        |
| vasculature development                                                                                                   | 5.70E-04 | 13 | <i>MLL fusion gene</i>                                                      | <i>good prognosis</i><br><i>inv(16)</i><br><i>NPM1 mutation</i>                                        |
| cell death                                                                                                                | 6.10E-04 | 33 | <i>CD34+CD38- fraction</i><br><i>CEBPA mutation</i>                         | <i>CD34+CD38+ fraction</i><br><i>inv(16)</i><br><i>MLL fusion gene</i><br><i>normal cytogenetics</i>   |
| death                                                                                                                     | 6.10E-04 | 33 | <i>CD34+CD38- fraction</i><br><i>CEBPA mutation</i>                         | <i>CD34+CD38+ fraction</i><br><i>inv(16)</i><br><i>MLL fusion gene</i><br><i>normal cytogenetics</i>   |
| vesicle-mediated transport                                                                                                | 6.20E-04 | 26 | <i>poor prognosis</i>                                                       | <i>inv(16)</i><br><i>MLL fusion gene</i>                                                               |
| hemostasis                                                                                                                | 6.40E-04 | 11 |                                                                             | <i>inv(16)</i><br><i>NPM1 mutation</i>                                                                 |
| immunoglobulin mediated immune response                                                                                   | 7.50E-04 | 8  |                                                                             |                                                                                                        |
| lymphocyte mediated immunity                                                                                              | 8.30E-04 | 9  |                                                                             | <i>NPM1 mutation</i>                                                                                   |
| B cell mediated immunity                                                                                                  | 8.70E-04 | 8  |                                                                             |                                                                                                        |
| blood vessel morphogenesis                                                                                                | 9.30E-04 | 12 |                                                                             | <i>inv(16)</i>                                                                                         |
| regulation of immune response                                                                                             | 1.16E-03 | 10 |                                                                             | <i>NPM1 mutation</i>                                                                                   |
| adaptive immune response based on somatic recombination of immune receptors built from immunoglobulin superfamily domains | 1.30E-03 | 9  |                                                                             | <i>NPM1 mutation</i>                                                                                   |
| adaptive immune response                                                                                                  | 1.30E-03 | 9  |                                                                             | <i>NPM1 mutation</i>                                                                                   |
| apoptosis                                                                                                                 | 1.37E-03 | 31 | <i>CD34+CD38- fraction</i><br><i>CEBPA mutation</i>                         | <i>CD34+CD38+ fraction</i><br><i>MLL fusion gene</i><br><i>normal cytogenetics</i>                     |
| anatomical structure formation                                                                                            | 1.42E-03 | 12 |                                                                             | <i>inv(16)</i>                                                                                         |
| intracellular signaling cascade                                                                                           | 1.44E-03 | 55 | <i>poor prognosis</i>                                                       | <i>good prognosis</i><br><i>inv(16)</i><br><i>MLL fusion gene</i><br><i>NPM1 mutation</i>              |
| skeletal development                                                                                                      | 1.55E-03 | 14 |                                                                             | <i>inv(16)</i>                                                                                         |
| programmed cell death                                                                                                     | 1.66E-03 | 31 | <i>CD34+CD38- fraction</i>                                                  | <i>CD34+CD38+ fraction</i><br><i>MLL fusion gene</i><br><i>normal cytogenetics</i>                     |
| regulation of apoptosis                                                                                                   | 1.80E-03 | 24 | <i>CD34+CD38- fraction</i><br><i>CEBPA mutation</i>                         | <i>CD34+CD38+ fraction</i><br><i>CEBPA silenced</i><br><i>good prognosis</i><br><i>MLL fusion gene</i> |
| tissue development                                                                                                        | 1.96E-03 | 17 |                                                                             | <i>inv(16)</i>                                                                                         |

|                                                             |          |     |                                                                     |                                                                                                                                 |
|-------------------------------------------------------------|----------|-----|---------------------------------------------------------------------|---------------------------------------------------------------------------------------------------------------------------------|
| regulation of programmed cell death                         | 2.21E-03 | 24  | <i>CEBPA mutation</i>                                               | <i>CEBPA silenced</i><br><i>good prognosis</i><br><i>MLL fusion gene</i>                                                        |
| response to mechanical stimulus                             | 2.30E-03 | 5   |                                                                     | <i>inv(16)</i>                                                                                                                  |
| positive regulation of immune response                      | 2.43E-03 | 9   |                                                                     | <i>NPM1 mutation</i>                                                                                                            |
| production of molecular mediator of immune response         | 2.62E-03 | 6   |                                                                     | <i>inv(16)</i><br><i>NPM1 mutation</i>                                                                                          |
| regulation of body fluid levels                             | 2.65E-03 | 11  |                                                                     | <i>NPM1 mutation</i>                                                                                                            |
| blood coagulation                                           | 3.27E-03 | 10  |                                                                     | <i>NPM1 mutation</i>                                                                                                            |
| rhythmic process                                            | 3.50E-03 | 8   |                                                                     |                                                                                                                                 |
| regulation of cell activation                               | 3.57E-03 | 9   |                                                                     | <i>good prognosis</i><br><i>inv(16)</i><br><i>NPM1 mutation</i>                                                                 |
| regulation of leukocyte activation                          | 3.57E-03 | 9   |                                                                     | <i>good prognosis</i><br><i>inv(16)</i><br><i>NPM1 mutation</i>                                                                 |
| negative regulation of cell proliferation                   | 3.63E-03 | 14  | <i>euploid</i>                                                      | <i>aneuploid</i><br><i>inv(16)</i>                                                                                              |
| response to chemical stimulus                               | 3.72E-03 | 24  | <i>11q23</i><br><i>CD34+CD38- fraction</i><br><i>poor prognosis</i> | <i>CD34+CD38+ fraction</i><br><i>good prognosis</i><br><i>inv(16)</i><br><i>normal cytogenetics</i><br><i>NPM1 mutation</i>     |
| cytokine production                                         | 4.49E-03 | 10  | <i>CD34+CD38- fraction</i>                                          | <i>CD34+CD38+ fraction</i><br><i>FAB-M4</i><br><i>FAB-M5</i><br><i>good prognosis</i><br><i>inv(16)</i><br><i>NPM1 mutation</i> |
| coagulation                                                 | 4.49E-03 | 10  |                                                                     |                                                                                                                                 |
| positive regulation of cell proliferation                   | 4.66E-03 | 14  | <i>poor prognosis</i>                                               | <i>inv(16)</i><br><i>MLL fusion gene</i><br><i>NPM1 mutation</i>                                                                |
| regulation of transcription from RNA polymerase II promoter | 6.90E-03 | 19  | <i>CEBPA mutation</i><br><i>MLL fusion gene</i>                     | <i>good prognosis</i><br><i>normal cytogenetics</i><br><i>NPM1 mutation</i>                                                     |
| localization                                                | 8.23E-03 | 100 | <i>poor prognosis</i>                                               | <i>FAB-M7</i><br><i>good prognosis</i><br><i>inv(16)</i><br><i>MLL fusion gene</i>                                              |
| regulation of response to stimulus                          | 8.32E-03 | 11  |                                                                     | <i>good prognosis</i><br><i>NPM1 mutation</i>                                                                                   |
| locomotory behavior                                         | 8.56E-03 | 12  | <i>11q23</i><br><i>CD34+CD38- fraction</i><br><i>control</i>        | <i>CD34+CD38+ fraction</i><br><i>inv(16)</i><br><i>NPM1 mutation</i>                                                            |
| regulation of mast cell cytokine production                 | 8.92E-03 | 3   |                                                                     | <i>good prognosis</i><br><i>inv(16)</i><br><i>normal cytogenetics</i>                                                           |
| mast cell cytokine production                               | 8.92E-03 | 3   |                                                                     | <i>good prognosis</i><br><i>inv(16)</i><br><i>normal cytogenetics</i>                                                           |
| lymphocyte activation                                       | 9.42E-03 | 11  | <i>FLT3 mutation</i>                                                | <i>inv(16)</i>                                                                                                                  |
| negative regulation of cytokine production                  | 9.49E-03 | 4   |                                                                     |                                                                                                                                 |

#### Molecular Functions

|                               |          |    |                            |                                                                                                              |
|-------------------------------|----------|----|----------------------------|--------------------------------------------------------------------------------------------------------------|
| signal transducer activity    | 3.82E-08 | 99 | <i>CD34+CD38- fraction</i> | <i>CD34+CD38+ fraction</i><br><i>FAB-M4</i><br><i>FAB-M5</i><br><i>inv(16)</i><br><i>normal cytogenetics</i> |
| molecular transducer activity | 3.82E-08 | 99 | <i>CD34+CD38- fraction</i> | <i>CD34+CD38+ fraction</i><br><i>FAB-M4</i><br><i>FAB-M5</i><br><i>inv(16)</i><br><i>normal cytogenetics</i> |

|                                        |          |     |                                                                                        |                                                                                                 |
|----------------------------------------|----------|-----|----------------------------------------------------------------------------------------|-------------------------------------------------------------------------------------------------|
| binding                                | 1.06E-05 | 353 | <i>CD34+CD38- fraction<br/>euploid</i>                                                 | <i>aneuploid<br/>CD34+CD38+ fraction<br/>good prognosis<br/>inv(16)<br/>normal cytogenetics</i> |
| enzyme regulator activity              | 6.45E-05 | 44  |                                                                                        |                                                                                                 |
| protein complex binding                | 5.80E-04 | 10  |                                                                                        | <i>inv(16)</i>                                                                                  |
| transcription activator activity       | 6.80E-04 | 17  | <i>poor prognosis</i>                                                                  | <i>good prognosis<br/>inv(16)<br/>NPM1 mutation</i>                                             |
| receptor binding                       | 7.70E-04 | 35  |                                                                                        | <i>11q23<br/>inv(16)<br/>NPM1 mutation</i>                                                      |
| transcription coactivator activity     | 4.53E-03 | 12  | <i>poor prognosis</i>                                                                  | <i>good prognosis<br/>inv(16)</i>                                                               |
| enzyme activator activity              | 4.92E-03 | 20  |                                                                                        |                                                                                                 |
| identical protein binding              | 6.43E-03 | 17  | <i>CD34+CD38+ fraction<br/>FLT3 mutation<br/>normal cytogenetics<br/>NPM1 mutation</i> | <i>abnormal cytogenetics<br/>CD34+CD38- fraction<br/>MLL fusion gene</i>                        |
| IgE binding                            | 8.42E-03 | 3   |                                                                                        |                                                                                                 |
| receptor activity                      | 9.20E-03 | 70  | <i>CD34+CD38- fraction</i>                                                             | <i>CD34+CD38+ fraction<br/>FAB-M4<br/>FAB-M5<br/>inv(16)</i>                                    |
| structural constituent of cytoskeleton | 9.41E-03 | 8   |                                                                                        |                                                                                                 |
| enzyme inhibitor activity              | 9.87E-03 | 18  |                                                                                        |                                                                                                 |

#### Cellular Components

|                         |          |     |                                                           |                                                                                                   |
|-------------------------|----------|-----|-----------------------------------------------------------|---------------------------------------------------------------------------------------------------|
| membrane                | 7.53E-18 | 233 | <i>normal cytogenetics</i>                                | <i>FLT3 mutation<br/>inv(16)<br/>MLL fusion gene</i>                                              |
| membrane part           | 5.49E-13 | 186 | <i>CEBPA mutation<br/>normal cytogenetics</i>             | <i>CEBPA silenced<br/>FAB-M4<br/>FAB-M5<br/>inv(16)<br/>MLL fusion gene</i>                       |
| intrinsic to membrane   | 4.60E-12 | 167 |                                                           | <i>CEBPA silenced<br/>FAB-M4<br/>FAB-M5<br/>inv(16)<br/>MLL fusion gene</i>                       |
| integral to membrane    | 4.98E-11 | 162 |                                                           | <i>CEBPA silenced<br/>FAB-M4<br/>FAB-M5<br/>inv(16)<br/>MLL fusion gene</i>                       |
| extracellular region    | 2.96E-09 | 76  | <i>CD34+CD38- fraction</i>                                | <i>11q23<br/>CD34+CD38+ fraction<br/>inv(16)<br/>NPM1 mutation<br/>t(15;17)</i>                   |
| intracellular organelle | 1.77E-07 | 216 | <i>CD34+CD38+ fraction<br/>low centrosome aberrations</i> | <i>abnormal cytogenetics<br/>CD34+CD38- fraction<br/>FLT3-TKD<br/>high centrosome aberrations</i> |
| organelle               | 1.83E-07 | 216 | <i>CD34+CD38+ fraction<br/>low centrosome aberrations</i> | <i>abnormal cytogenetics<br/>CD34+CD38- fraction<br/>FLT3-TKD<br/>high centrosome aberrations</i> |
| cytoplasmic part        | 4.25E-07 | 113 | <i>FLT3-ITD<br/>normal cytogenetics<br/>NPM1 mutation</i> | <i>abnormal cytogenetics<br/>FAB-M7<br/>inv(16)<br/>MLL fusion gene</i>                           |
| Golgi apparatus         | 1.80E-06 | 32  | <i>poor prognosis</i>                                     | <i>good prognosis<br/>inv(16)<br/>MLL fusion gene</i>                                             |

|                                    |          |    |                                                                              |                                                                                                                                                                                |
|------------------------------------|----------|----|------------------------------------------------------------------------------|--------------------------------------------------------------------------------------------------------------------------------------------------------------------------------|
| membrane fraction                  | 2.00E-05 | 29 | <i>del(7q)</i>                                                               | <i>FAB-M7</i><br><i>inv(16)</i><br><i>MLL fusion gene</i><br><i>normal cytogenetics</i>                                                                                        |
| melanosome                         | 3.77E-05 | 10 | <i>NRAS-PM</i>                                                               | <i>inv(16)</i>                                                                                                                                                                 |
| pigment granule                    | 3.77E-05 | 10 | <i>NRAS-PM</i>                                                               | <i>inv(16)</i>                                                                                                                                                                 |
| cytoplasmic vesicle                | 4.43E-05 | 22 |                                                                              | <i>inv(16)</i><br><i>MLL fusion gene</i>                                                                                                                                       |
| vesicle                            | 6.02E-05 | 22 |                                                                              | <i>inv(16)</i><br><i>MLL fusion gene</i>                                                                                                                                       |
| endomembrane system                | 1.50E-04 | 36 | <i>CEBPA mutation</i><br><i>poor prognosis</i>                               | <i>CEBPA silenced</i><br><i>good prognosis</i><br><i>inv(16)</i><br><i>MLL fusion gene</i><br><i>NPM1 mutation</i>                                                             |
| vacuole                            | 1.70E-04 | 15 | <i>CD34+CD38- fraction</i><br><i>CEBPA silenced</i><br><i>poor prognosis</i> | <i>CD34+CD38+ fraction</i><br><i>CEBPA mutation</i><br><i>FAB-M4</i><br><i>FAB-M5</i><br><i>good prognosis</i><br><i>inv(16)</i><br><i>MLL fusion gene</i><br><i>monocytic</i> |
| Golgi membrane                     | 3.00E-04 | 19 | <i>poor prognosis</i>                                                        | <i>inv(16)</i>                                                                                                                                                                 |
| Golgi apparatus part               | 6.50E-04 | 20 | <i>poor prognosis</i>                                                        | <i>inv(16)</i><br><i>MLL fusion gene</i>                                                                                                                                       |
| lysosome                           | 8.50E-04 | 13 | <i>CD34+CD38- fraction</i><br><i>CEBPA silenced</i><br><i>poor prognosis</i> | <i>CD34+CD38+ fraction</i><br><i>CEBPA mutation</i><br><i>FAB-M4</i><br><i>FAB-M5</i><br><i>good prognosis</i><br><i>inv(16)</i><br><i>MLL fusion gene</i><br><i>monocytic</i> |
| lytic vacuole                      | 9.90E-04 | 13 | <i>CD34+CD38- fraction</i><br><i>CEBPA silenced</i><br><i>poor prognosis</i> | <i>CD34+CD38+ fraction</i><br><i>CEBPA mutation</i><br><i>FAB-M4</i><br><i>FAB-M5</i><br><i>good prognosis</i><br><i>inv(16)</i><br><i>MLL fusion gene</i><br><i>monocytic</i> |
| extracellular region part          | 1.07E-03 | 31 | <i>CD34+CD38- fraction</i>                                                   | <i>11q23</i><br><i>CD34+CD38+ fraction</i><br><i>FLT3 mutation</i><br><i>inv(16)</i><br><i>NPM1 mutation</i>                                                                   |
| extracellular space                | 1.26E-03 | 22 | <i>CD34+CD38- fraction</i>                                                   | <i>11q23</i><br><i>CD34+CD38+ fraction</i><br><i>FLT3 mutation</i><br><i>inv(16)</i><br><i>NPM1 mutation</i>                                                                   |
| cytoplasmic membrane-bound vesicle | 1.60E-03 | 17 |                                                                              | <i>inv(16)</i><br><i>MLL fusion gene</i>                                                                                                                                       |
| integrin complex                   | 1.72E-03 | 7  |                                                                              | <i>inv(16)</i>                                                                                                                                                                 |
| membrane-bound vesicle             | 1.92E-03 | 17 |                                                                              | <i>inv(16)</i><br><i>MLL fusion gene</i>                                                                                                                                       |
| endoplasmic reticulum              | 2.19E-03 | 30 | <i>poor prognosis</i>                                                        | <i>CEBPA silenced</i><br><i>MLL fusion gene</i>                                                                                                                                |
| organelle membrane                 | 3.03E-03 | 43 | <i>poor prognosis</i>                                                        | <i>MLL fusion gene</i>                                                                                                                                                         |
| receptor complex                   | 3.78E-03 | 9  |                                                                              | <i>inv(16)</i><br><i>MLL fusion gene</i>                                                                                                                                       |
| lipid raft                         | 6.43E-03 | 6  |                                                                              | <i>inv(16)</i>                                                                                                                                                                 |

Significantly over-represented functional gene ontology (GO) categories of down-regulated genes associated with t(8;21) are presented here. GO categories that are also over-represented in up-regulated genes associated with t(8;21) are not included. Corrected p-value is the Bonferroni multiple hypothesis. Identification tags that are both up-regulated and down-regulated are not included in the 'other tags' columns. Identification tag descriptions can be found in Table S1.
